# Supplementary material for: Prostaglandin synthases and pro-inflammatory cytokine gene expression dynamics in bovine endometrial cells exposed to cow blood plasma small extracellular vesicles (sEV) reflect the fertility breeding value
Source: Research Square preprint supplement (doi:10.21203/rs.3.rs-2342758/v1), 2022-12-13

bCSC – GO Biological Processes

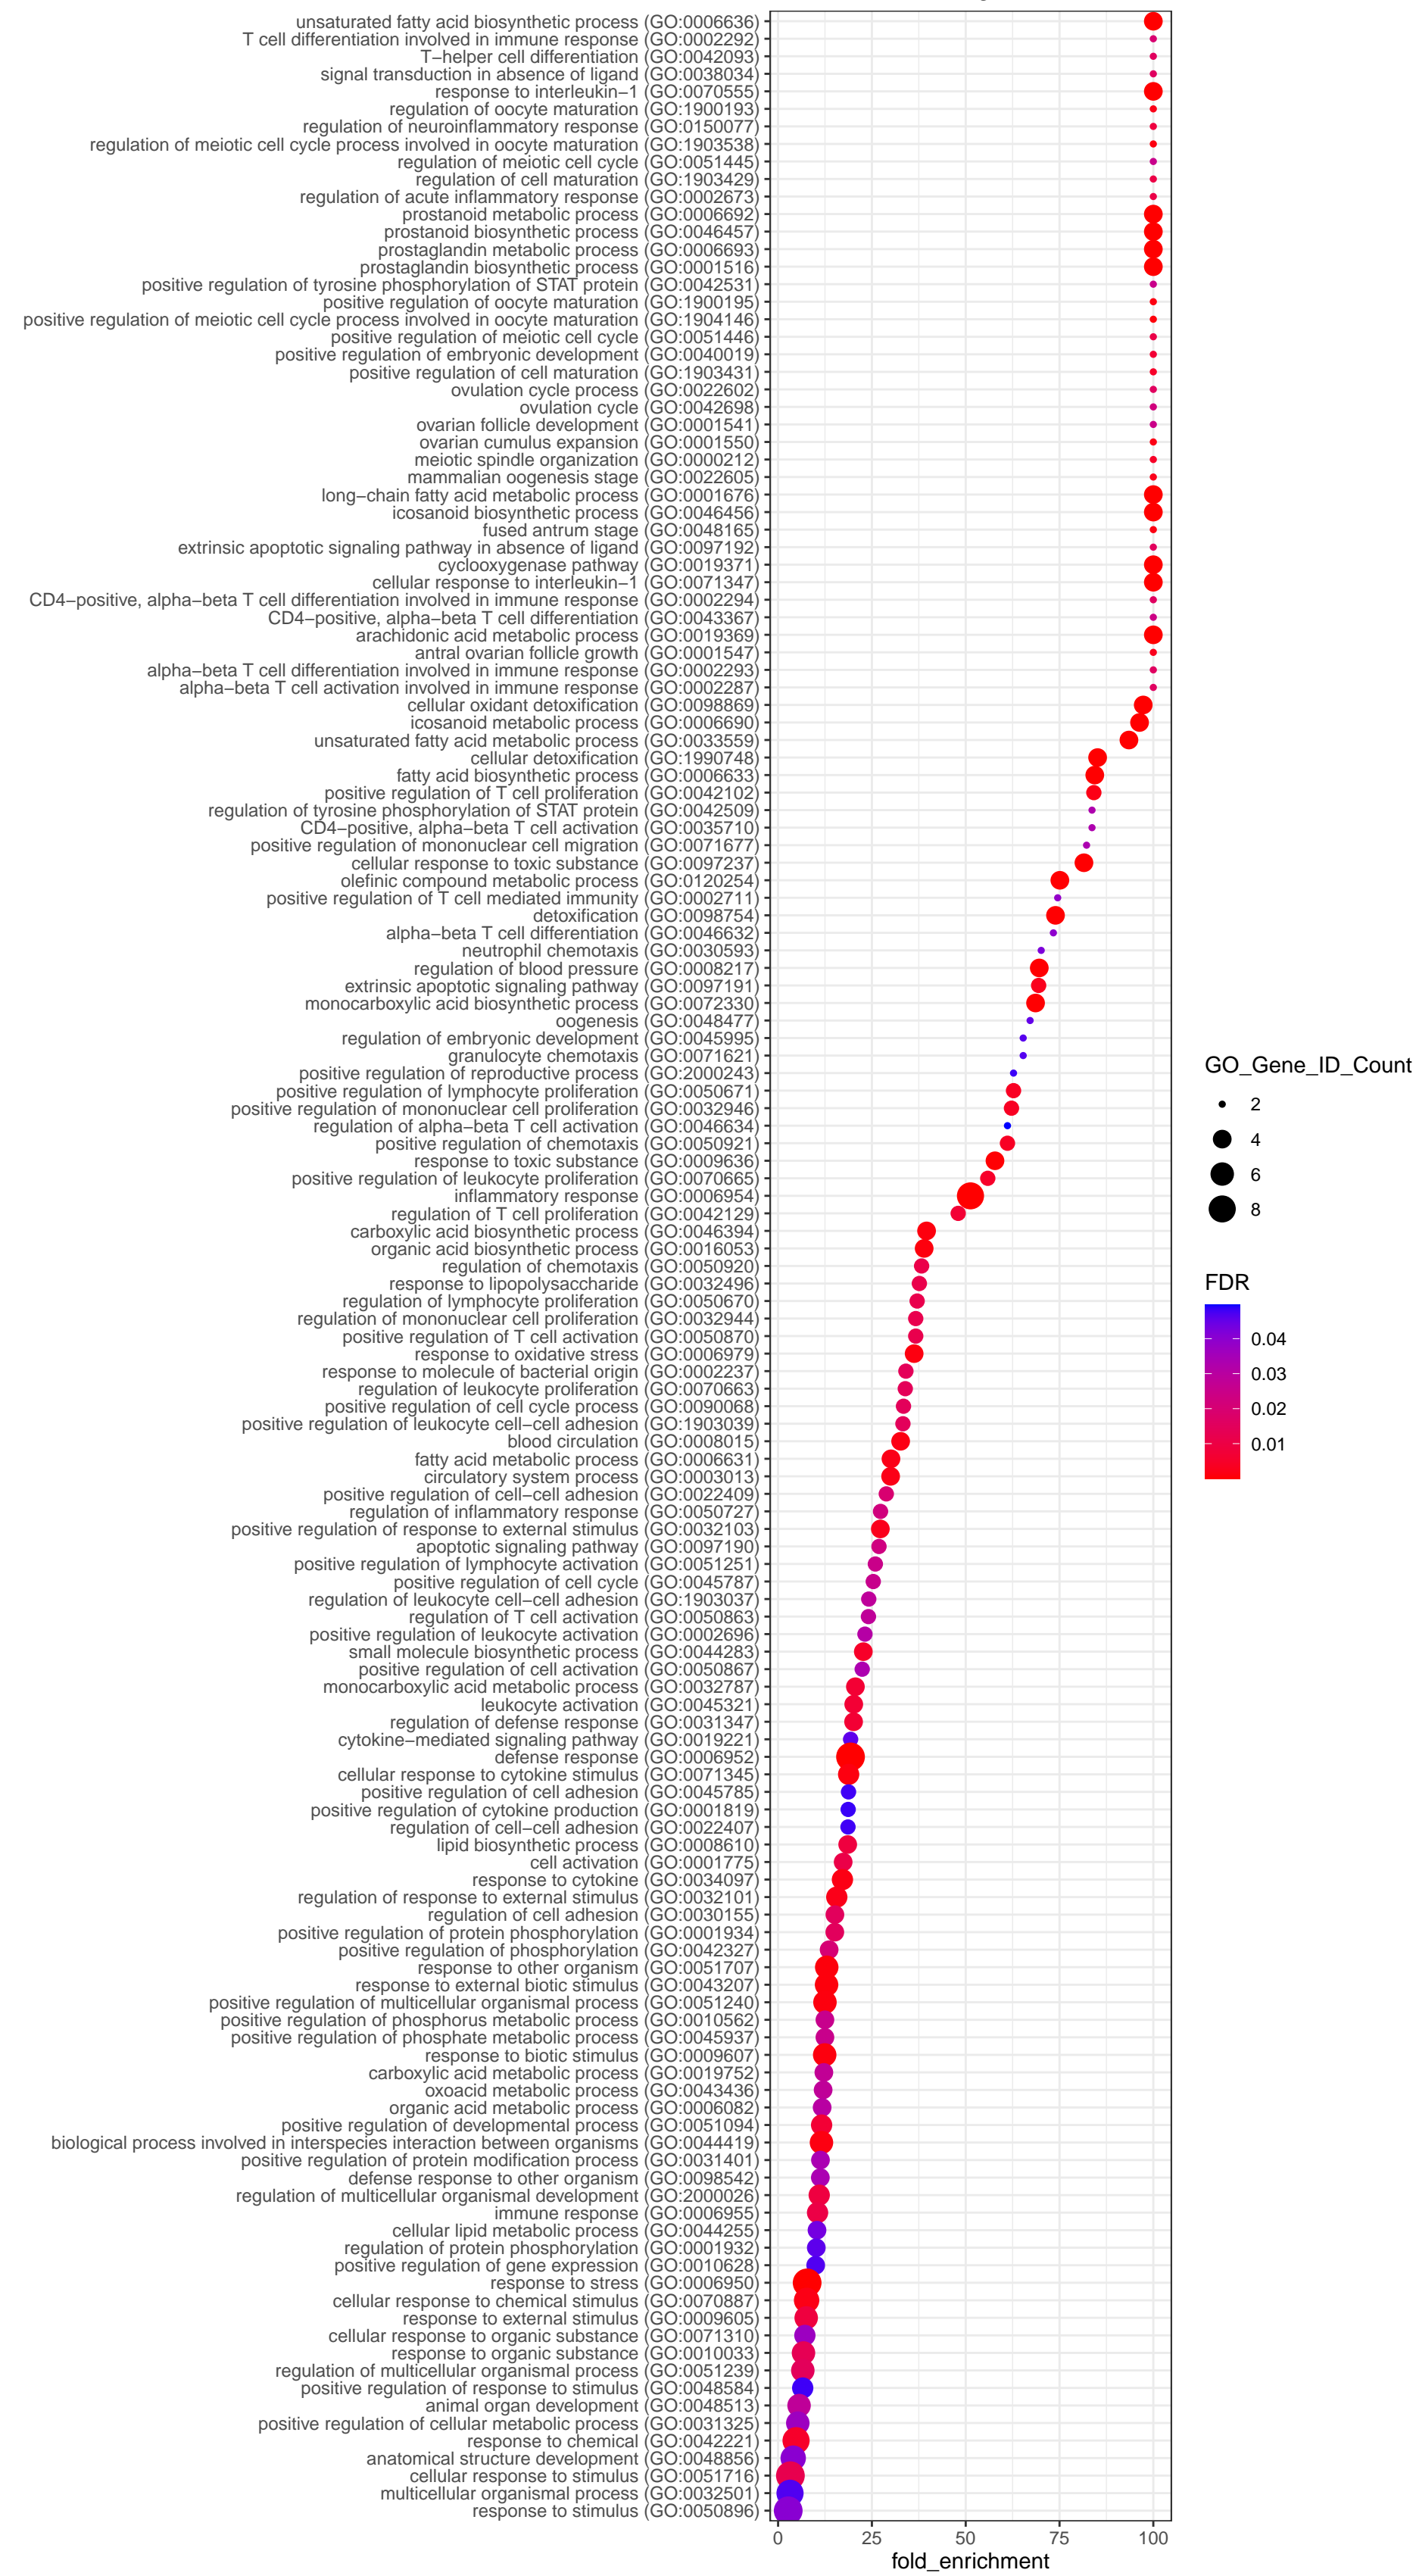

# GO enrichment analysis\_bEEL- Biological Processes

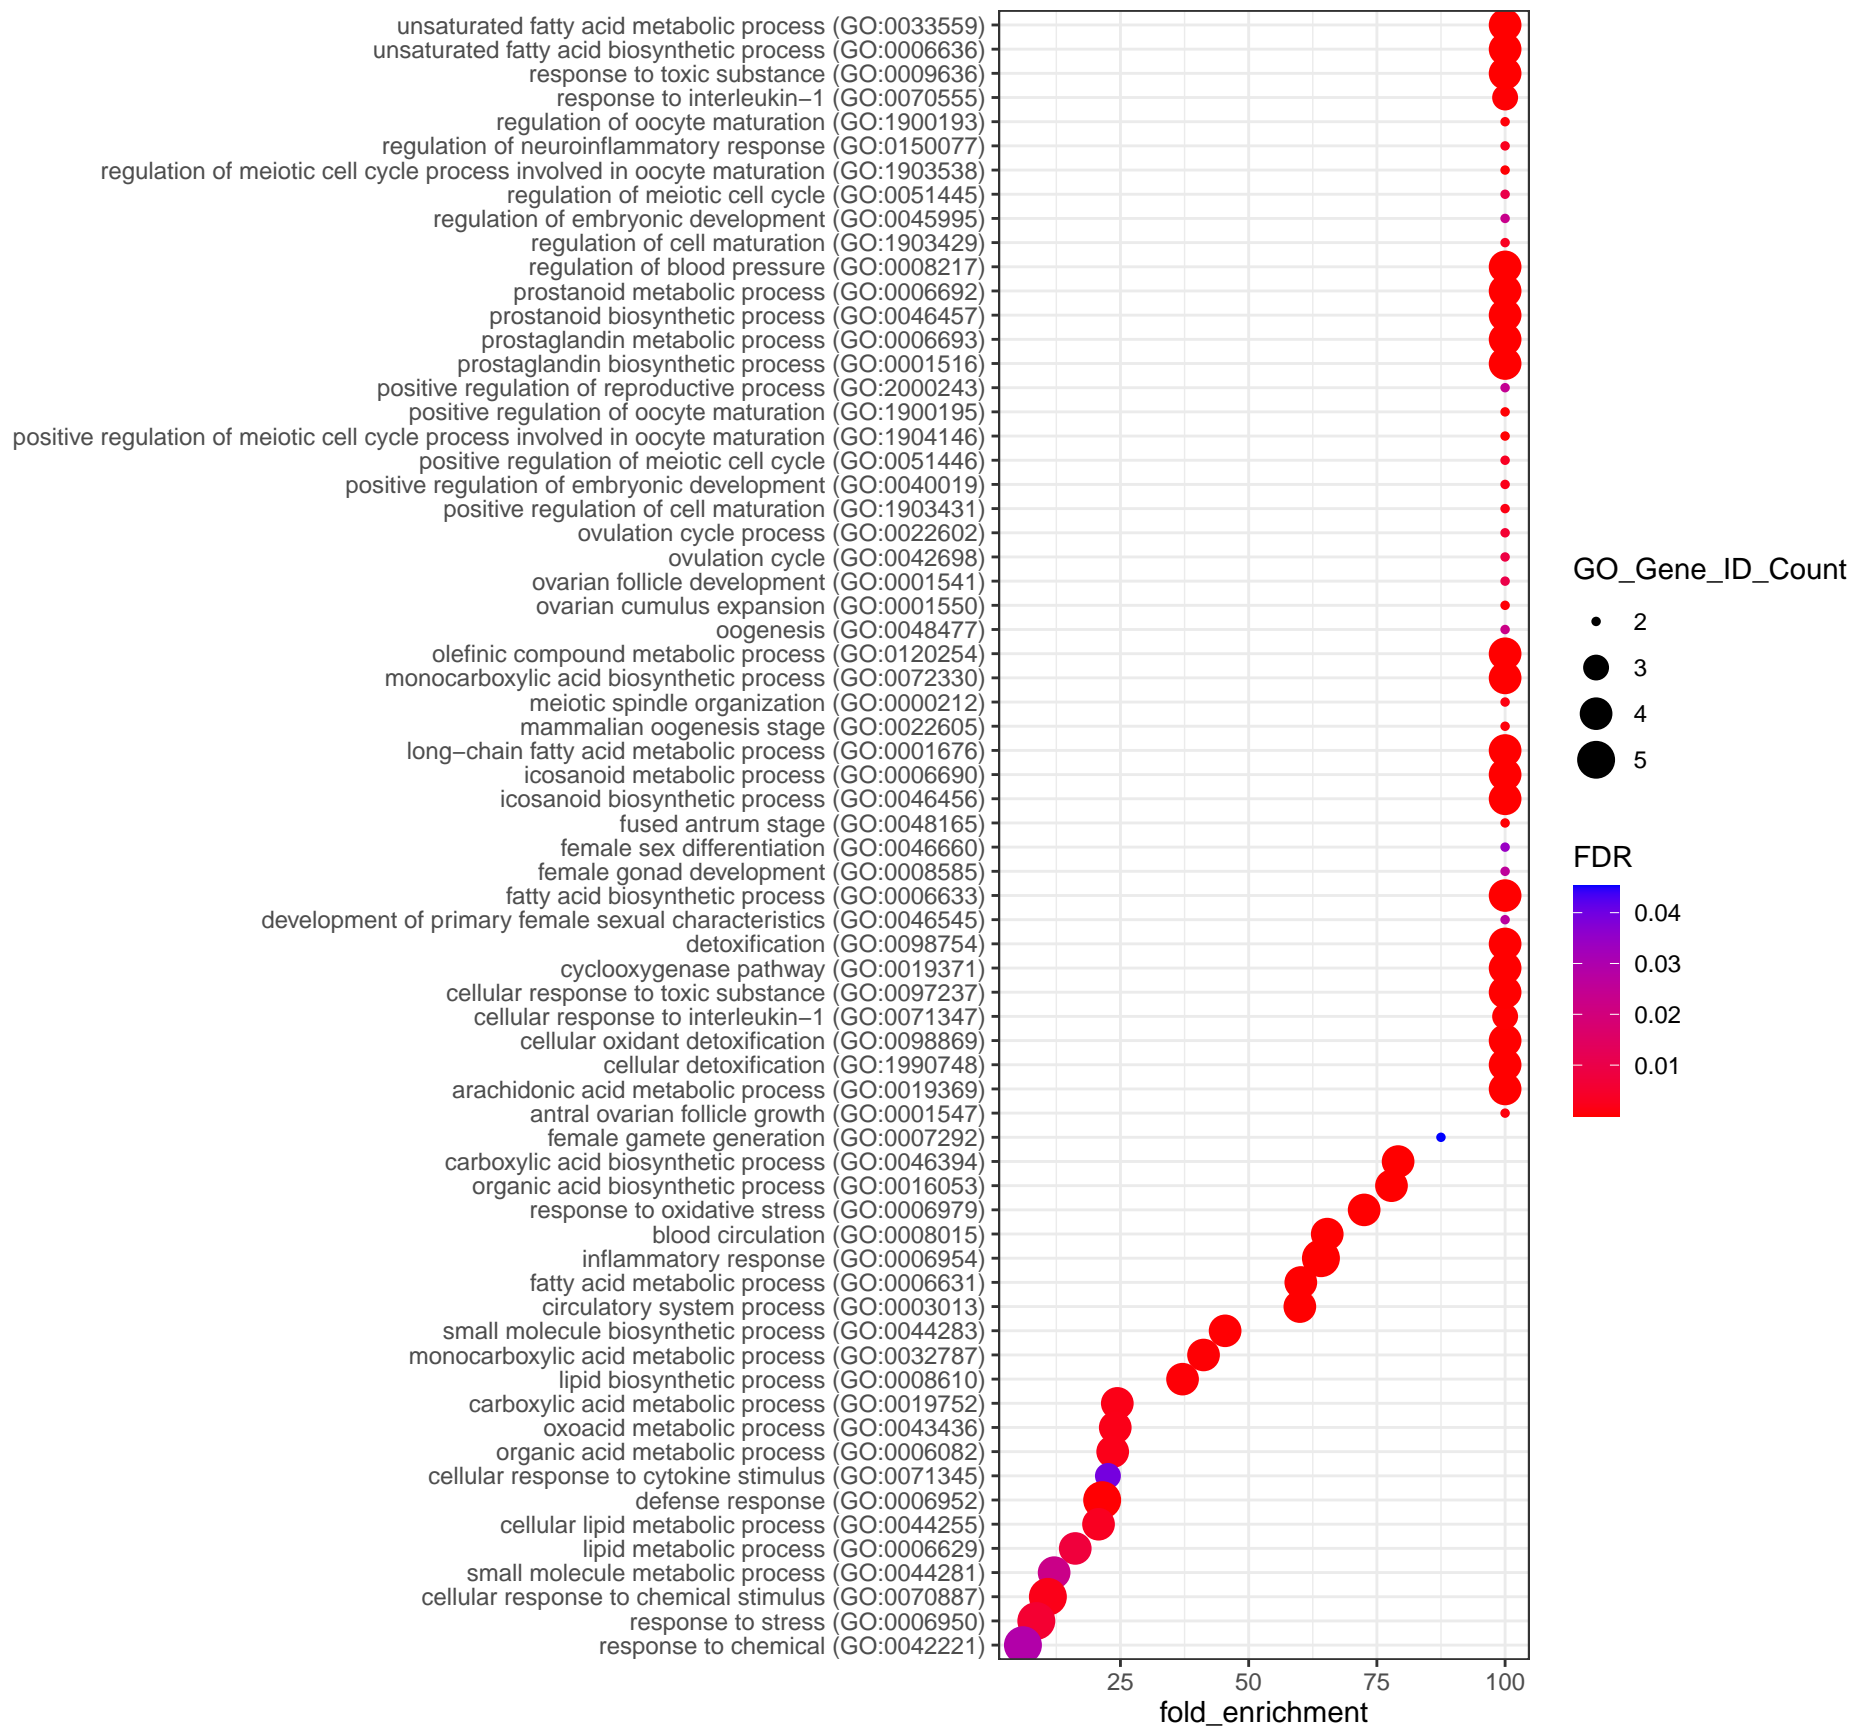

# GO enrichment analysis\_bCSC – Cellular Component

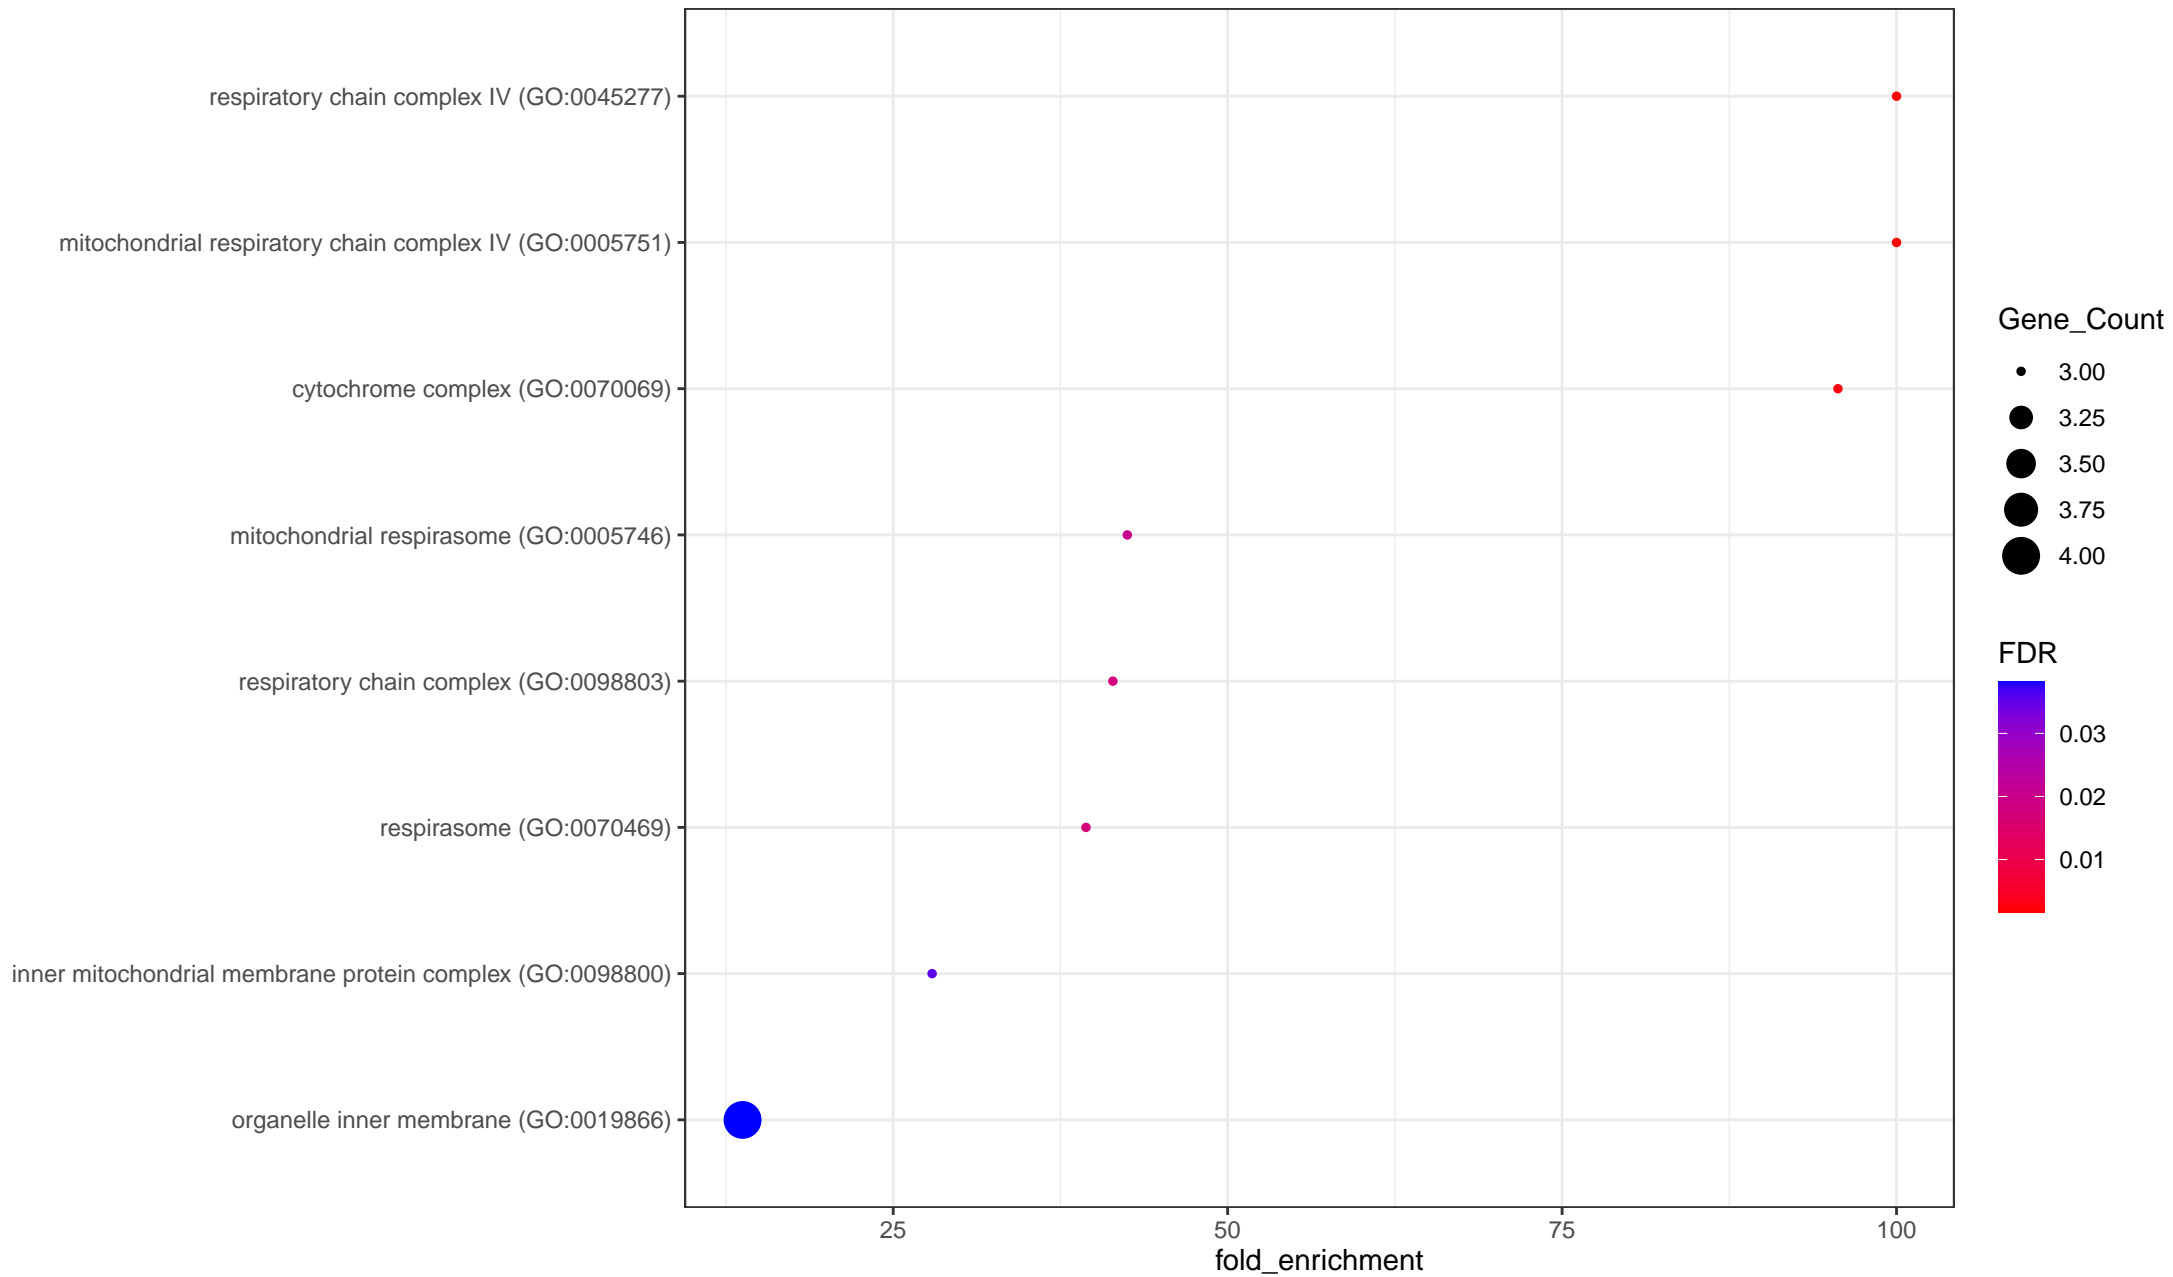

# GO enrichment analysis\_bEEL – Cellular Component

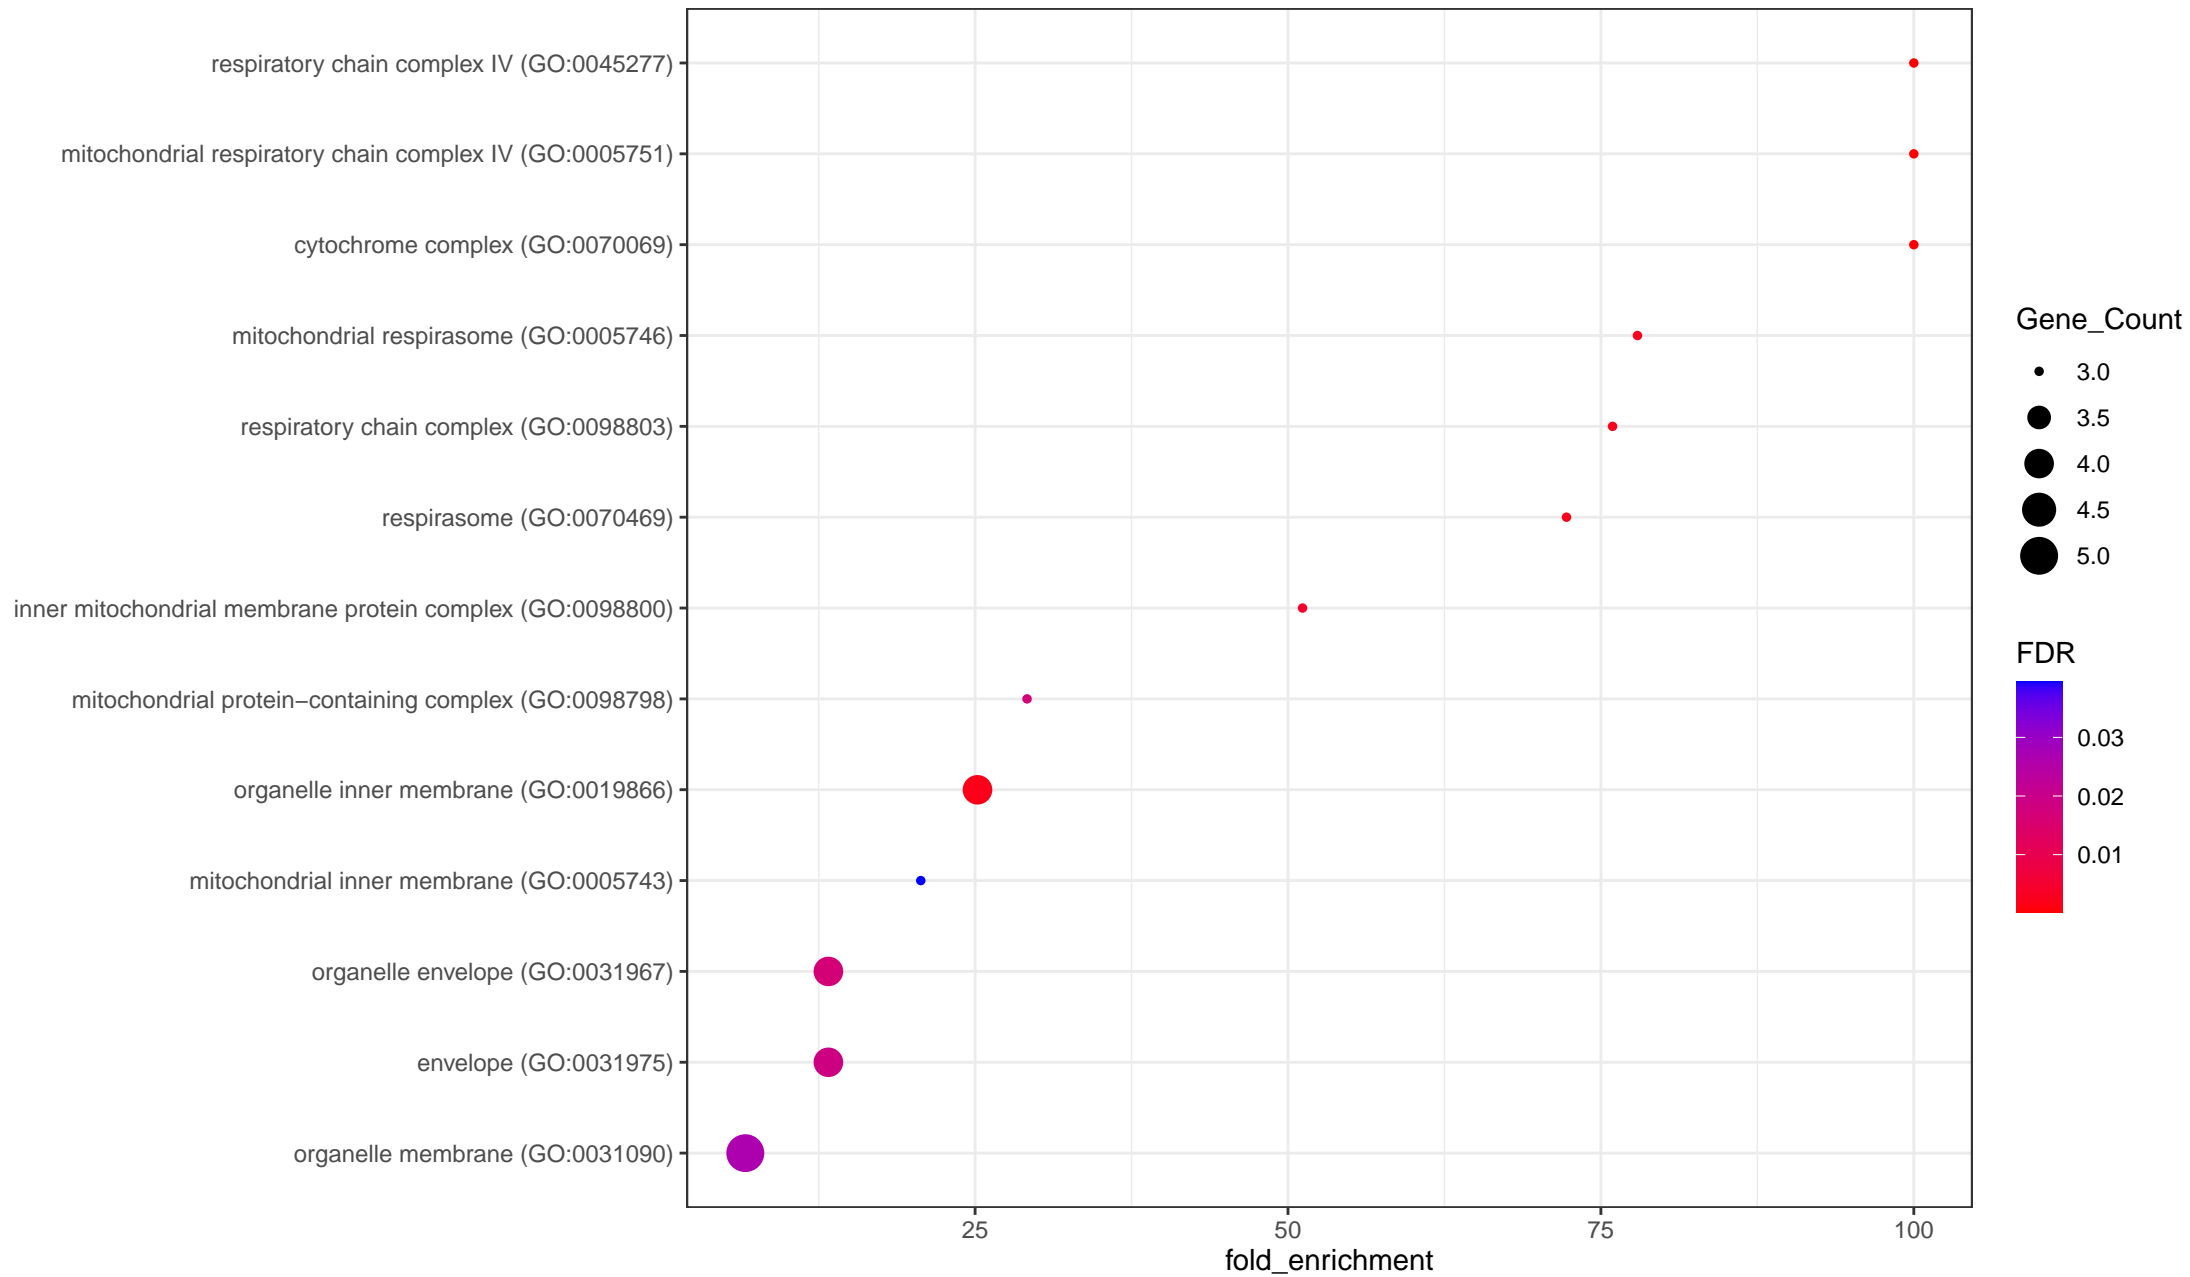

# GO enrichment analysis\_bCSC – Molecular Function

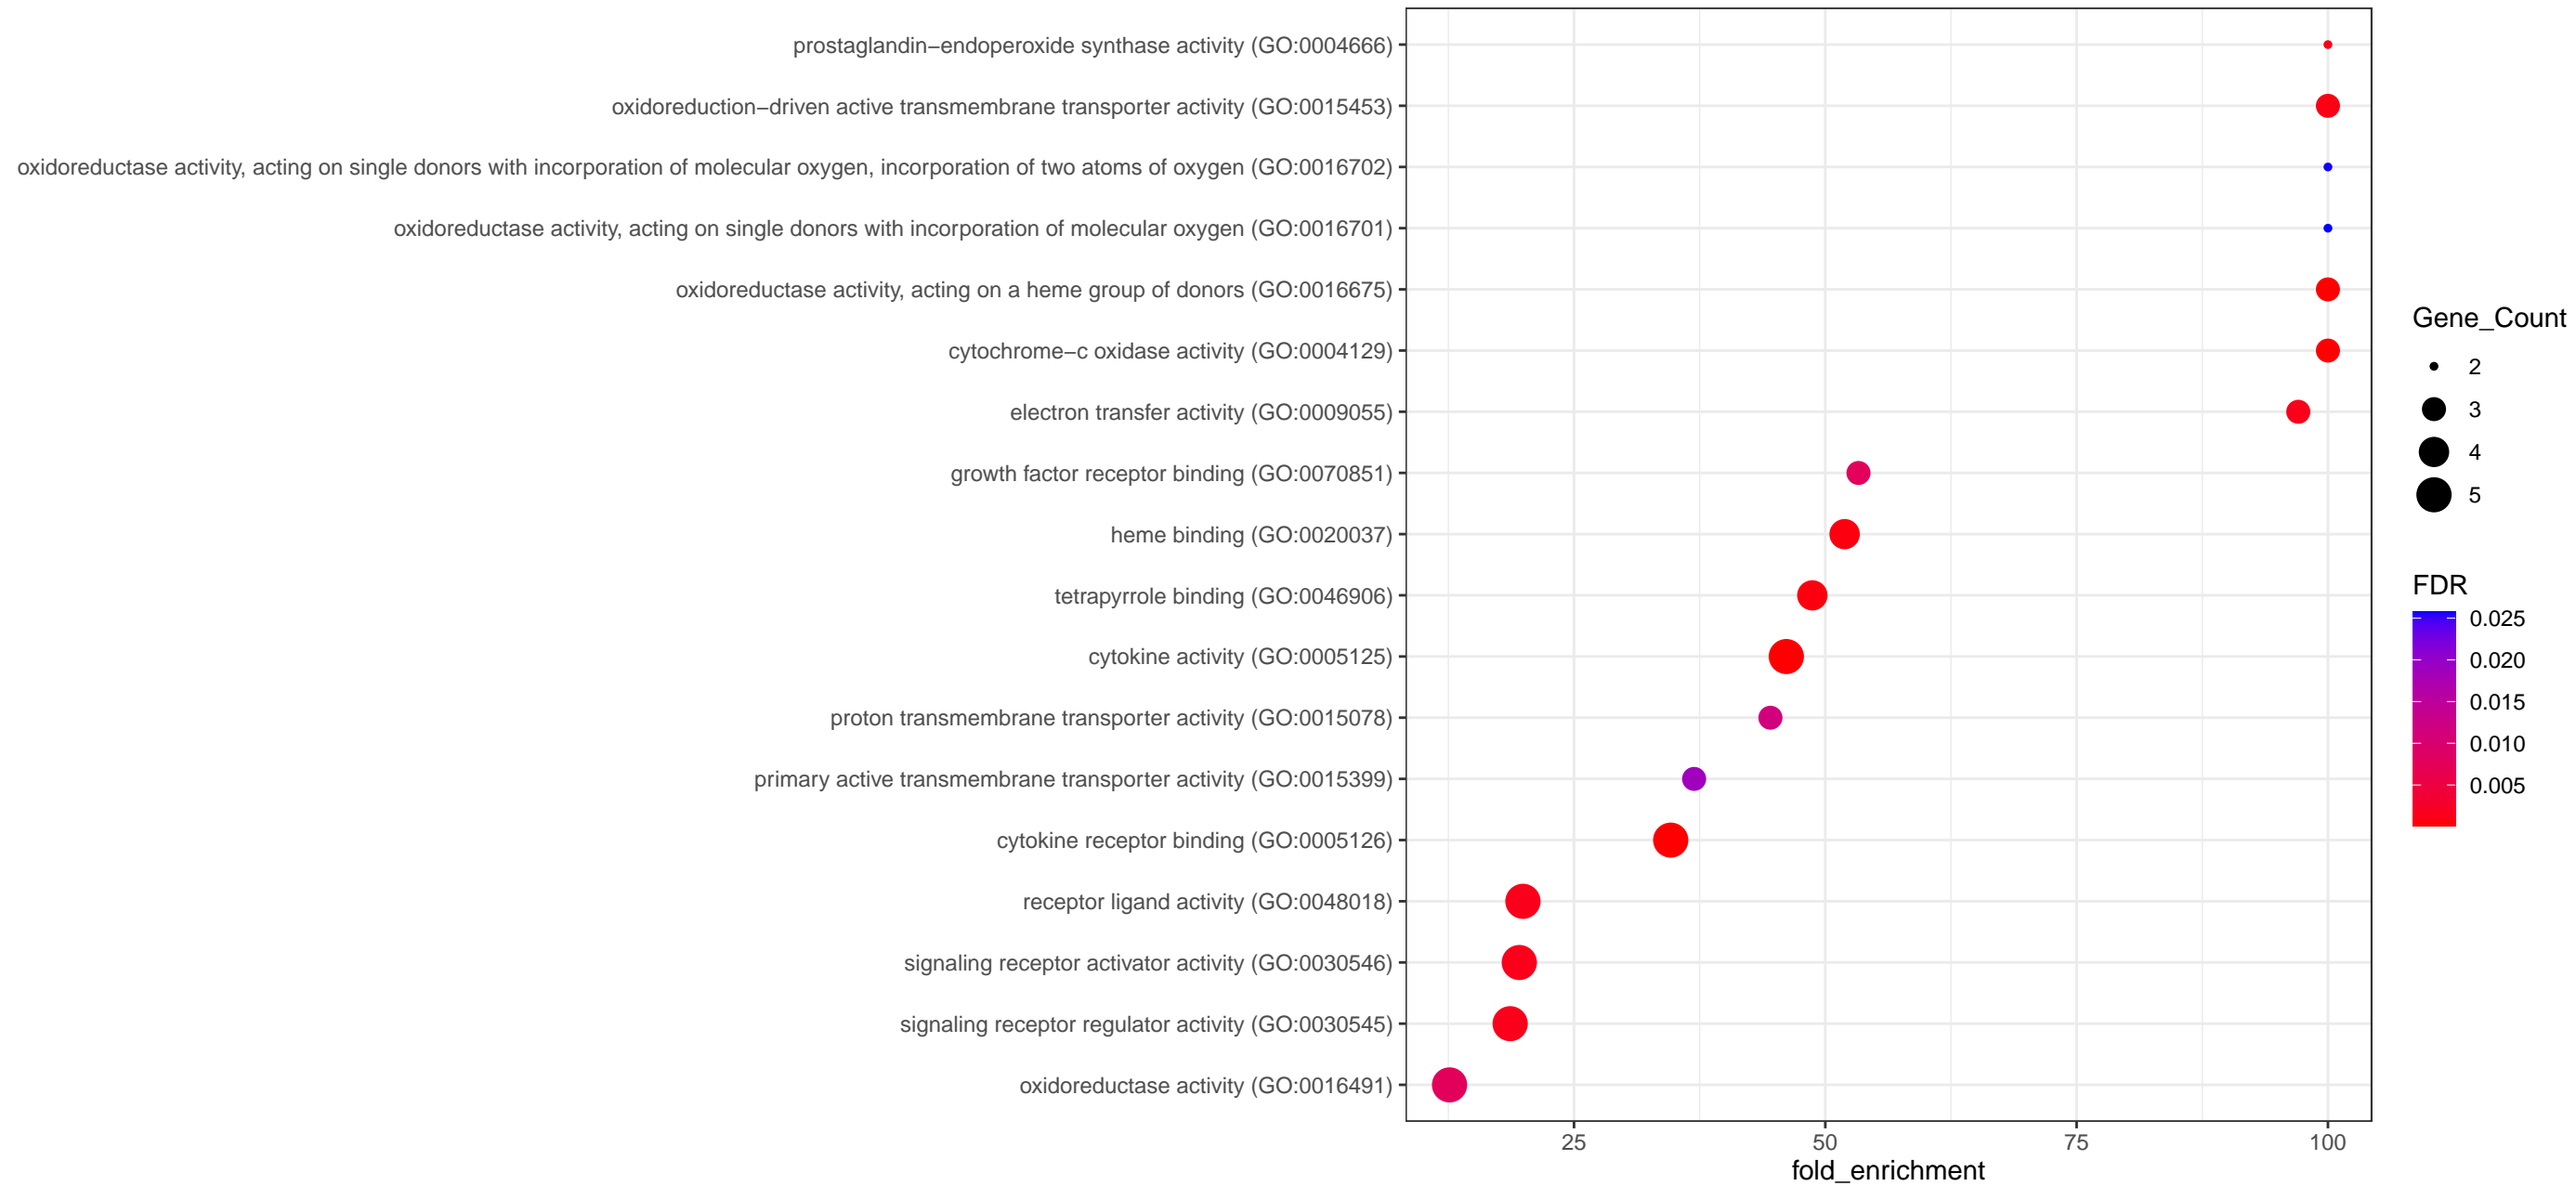

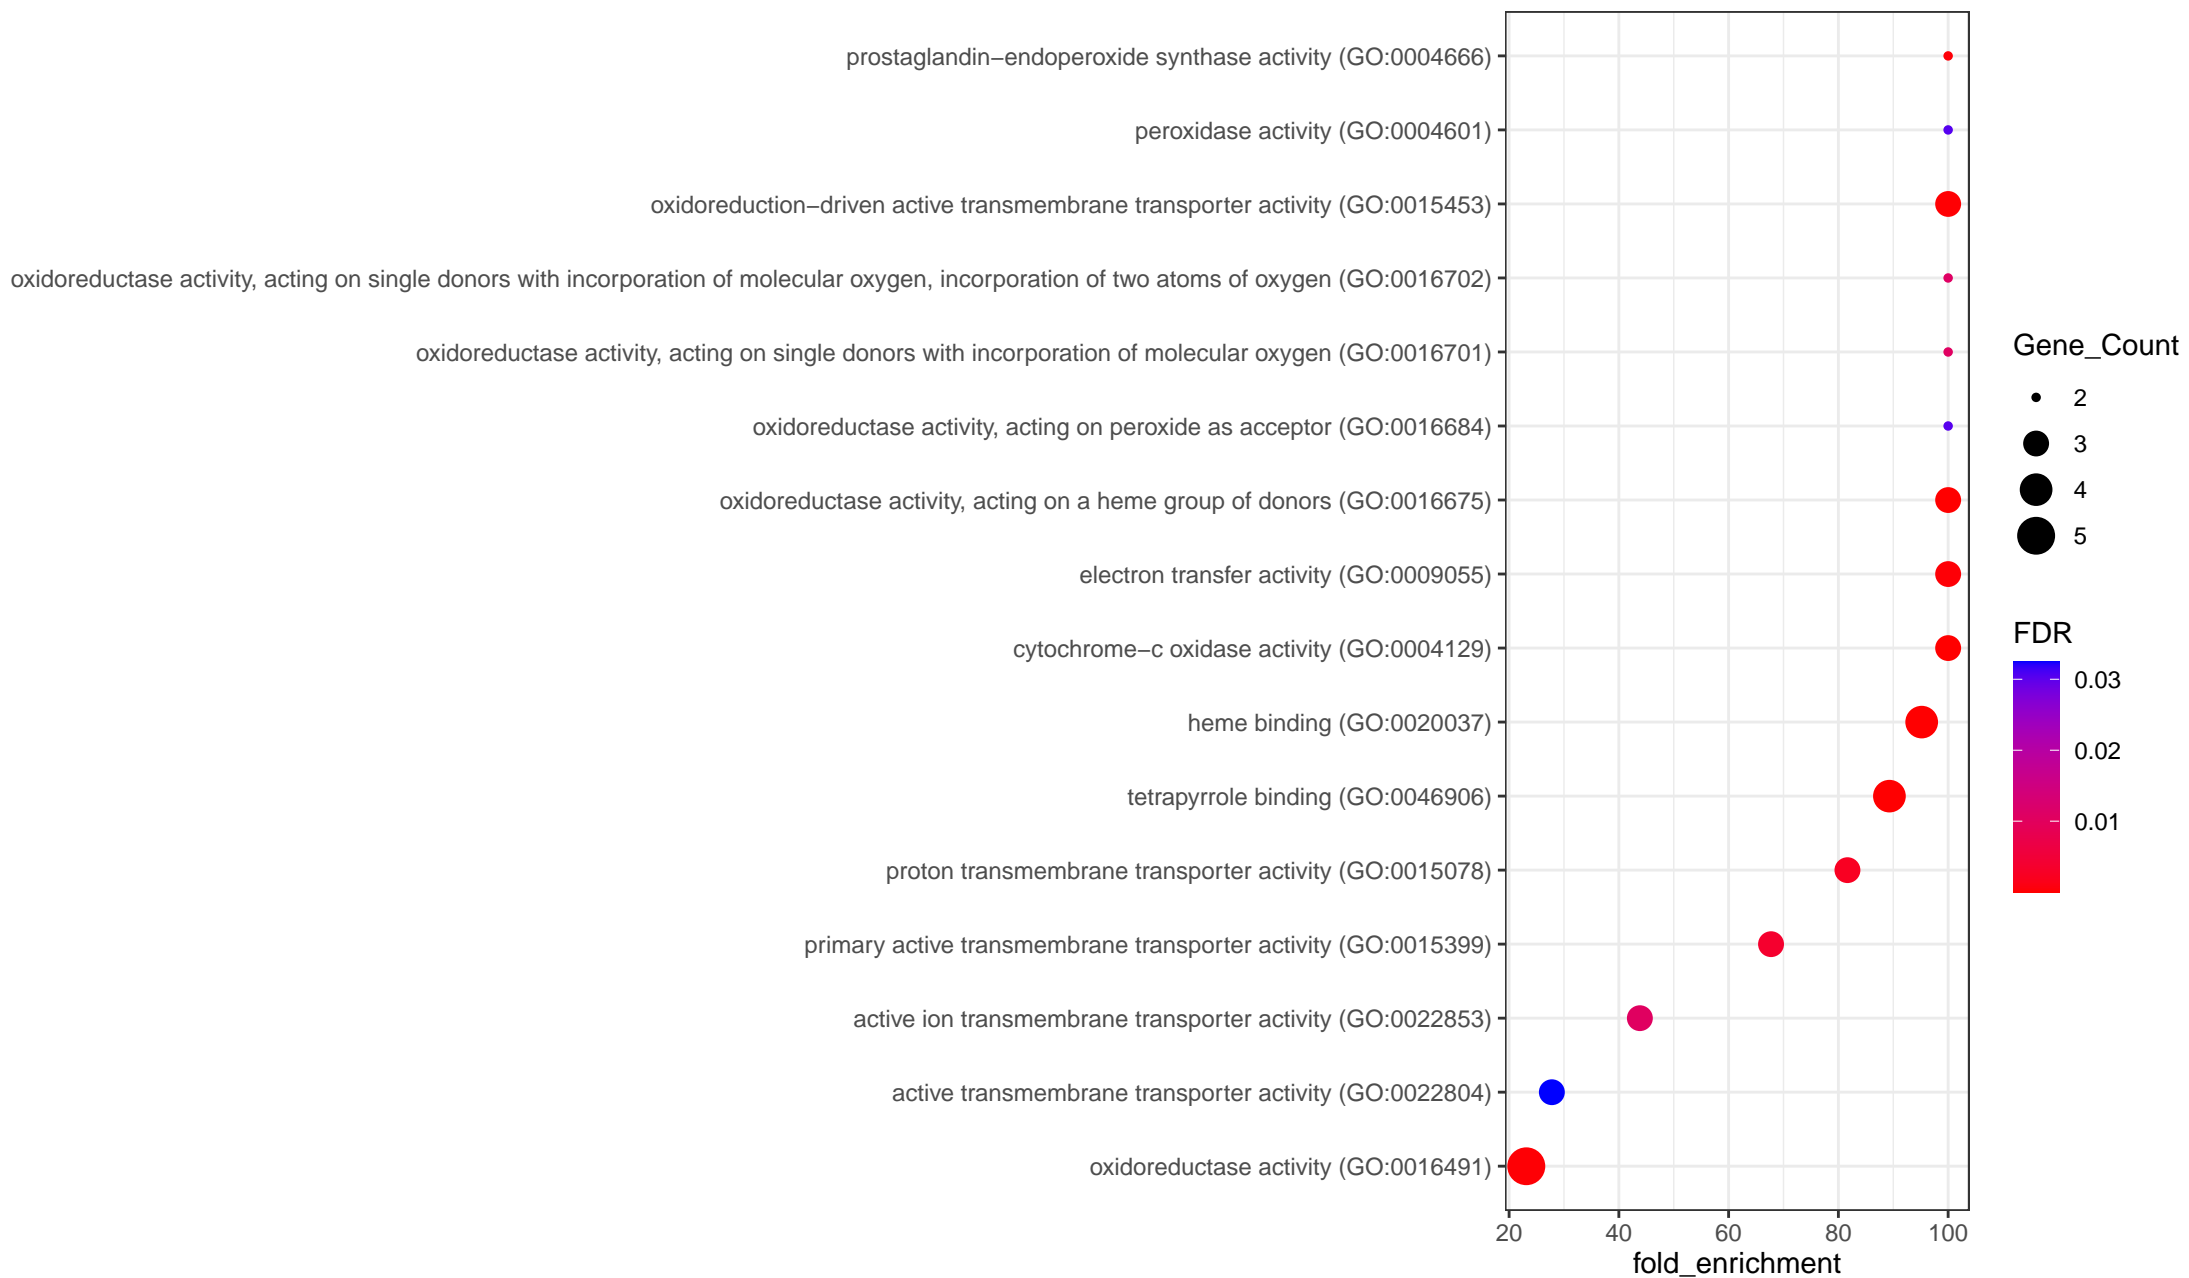

Supplement: Supplementary file 1 [file 1f1d9453d6d465f7cc6104b5.pdf]
