# Supplementary material for: Prostaglandin synthases and pro-inflammatory cytokine gene expression dynamics in bovine endometrial cells exposed to cow blood plasma small extracellular vesicles (sEV) reflect the fertility breeding value
Source: Research Square preprint supplement (doi:10.21203/rs.3.rs-2342758/v1), 2022-12-13
Supplement: Supplementary file 1 [file 6a56c1edc059d9d0c3cd3951.xlsx]

## Sheet: Plate plan
CLAB39919
	1	2	3	4	5	6	7	8	9	10	11	12	13	14	15	16	17	18	19	20	21	22	23	24
A	PLCB2	FAAH	PTGS2	HPGD	PLCB2	FAAH	PTGS2	HPGD	PLCB2	FAAH	PTGS2	HPGD	PLCB2	FAAH	PTGS2	HPGD	PLCB2	FAAH	PTGS2	HPGD	PLCB2	FAAH	PTGS2	HPGD
B	PTGES	PTGIS	HPGDS	DAGLA	PTGES	PTGIS	HPGDS	DAGLA	PTGES	PTGIS	HPGDS	DAGLA	PTGES	PTGIS	HPGDS	DAGLA	PTGES	PTGIS	HPGDS	DAGLA	PTGES	PTGIS	HPGDS	DAGLA
C	MGLL	PTGES2	PTGS1	IL1B	MGLL	PTGES2	PTGS1	IL1B	MGLL	PTGES2	PTGS1	IL1B	MGLL	PTGES2	PTGS1	IL1B	MGLL	PTGES2	PTGS1	IL1B	MGLL	PTGES2	PTGS1	IL1B
D	IL1A	CXCL8	IL4	IL6	IL1A	CXCL8	IL4	IL6	IL1A	CXCL8	IL4	IL6	IL1A	CXCL8	IL4	IL6	IL1A	CXCL8	IL4	IL6	IL1A	CXCL8	IL4	IL6
E	IL10	CXCL5	CXCL9	CXCL10	IL10	CXCL5	CXCL9	CXCL10	IL10	CXCL5	CXCL9	CXCL10	IL10	CXCL5	CXCL9	CXCL10	IL10	CXCL5	CXCL9	CXCL10	IL10	CXCL5	CXCL9	CXCL10
F	CXCL11	CXCL12	CX3CL1	CXCR3	CXCL11	CXCL12	CX3CL1	CXCR3	CXCL11	CXCL12	CX3CL1	CXCR3	CXCL11	CXCL12	CX3CL1	CXCR3	CXCL11	CXCL12	CX3CL1	CXCR3	CXCL11	CXCL12	CX3CL1	CXCR3
G	IFNG	MMP7	MMP9	MMP12	IFNG	MMP7	MMP9	MMP12	IFNG	MMP7	MMP9	MMP12	IFNG	MMP7	MMP9	MMP12	IFNG	MMP7	MMP9	MMP12	IFNG	MMP7	MMP9	MMP12
H	TIMP1	TIMP2	KISS1	GNRHR	TIMP1	TIMP2	KISS1	GNRHR	TIMP1	TIMP2	KISS1	GNRHR	TIMP1	TIMP2	KISS1	GNRHR	TIMP1	TIMP2	KISS1	GNRHR	TIMP1	TIMP2	KISS1	GNRHR
I	DES	ACTA2	PRDX6	IL17A	DES	ACTA2	PRDX6	IL17A	DES	ACTA2	PRDX6	IL17A	DES	ACTA2	PRDX6	IL17A	DES	ACTA2	PRDX6	IL17A	DES	ACTA2	PRDX6	IL17A
J	CL43	DNASE1	BOLA-N	KCTD11	CL43	DNASE1	BOLA-N	KCTD11	CL43	DNASE1	BOLA-N	KCTD11	CL43	DNASE1	BOLA-N	KCTD11	CL43	DNASE1	BOLA-N	KCTD11	CL43	DNASE1	BOLA-N	KCTD11
K	AHCY	PRKDC	PLA2G2A	OSTF1	AHCY	PRKDC	PLA2G2A	OSTF1	AHCY	PRKDC	PLA2G2A	OSTF1	AHCY	PRKDC	PLA2G2A	OSTF1	AHCY	PRKDC	PLA2G2A	OSTF1	AHCY	PRKDC	PLA2G2A	OSTF1
L	IL12A	CXCL3	DNMT1	DNMT3A	IL12A	CXCL3	DNMT1	DNMT3A	IL12A	CXCL3	DNMT1	DNMT3A	IL12A	CXCL3	DNMT1	DNMT3A	IL12A	CXCL3	DNMT1	DNMT3A	IL12A	CXCL3	DNMT1	DNMT3A
M	DNMT3B	TGFB1	TGFB2	RAB27A	DNMT3B	TGFB1	TGFB2	RAB27A	DNMT3B	TGFB1	TGFB2	RAB27A	DNMT3B	TGFB1	TGFB2	RAB27A	DNMT3B	TGFB1	TGFB2	RAB27A	DNMT3B	TGFB1	TGFB2	RAB27A
N	TNF	PTGES3	CCL2	CCL3	TNF	PTGES3	CCL2	CCL3	TNF	PTGES3	CCL2	CCL3	TNF	PTGES3	CCL2	CCL3	TNF	PTGES3	CCL2	CCL3	TNF	PTGES3	CCL2	CCL3
O	CCL4	ACTB	TBP	HPRT1	CCL4	ACTB	TBP	HPRT1	CCL4	ACTB	TBP	HPRT1	CCL4	ACTB	TBP	HPRT1	CCL4	ACTB	TBP	HPRT1	CCL4	ACTB	TBP	HPRT1
P	GAPDH	GDC	RTC	PPC	GAPDH	GDC	RTC	PPC	GAPDH	GDC	RTC	PPC	GAPDH	GDC	RTC	PPC	GAPDH	GDC	RTC	PPC	GAPDH	GDC	RTC	PPC
1	PLCB2	Phospholipase C, beta 2
2	PTGES	Prostaglandin E synthase
3	MGLL	Monoglyceride lipase
4	IL1A	Interleukin -1-Alpha
5	IL10	Interleukin-10
6	CXCL11	C-X-C motif chemokine ligand 11
7	IFNG	interferon gamma
8	TIMP1	TIMP metallopeptidase inhibitor 1
9	DES	Desmin
10	CL43	Collectin of 43 kDa
11	AHCY	Adenosylhomocysteinase
12	IL12A	Interleukin -12-Alpha
13	DNMT3B	DNA methyltransferase 3 beta
14	TNF	Tumor necrosis factor alpha
15	CCL4	C-C Motif Chemokine Ligand 4
16	GAPDH	Glyceraldehyde 3-phosphate dehydrogenase
17	FAAH	Fatty acid amide hydrolase
18	PTGIS	Prostaglandin I2 (prostacyclin) synthase
19	PTGES2	Prostaglandin E synthase 2
20	CXCL8	Interleukin 8
21	CXCL5	chemokine (C-X-C motif) ligand 5
22	CXCL12	C-X-C motif chemokine ligand 12
23	MMP7	matrix metallopeptidase 7
24	TIMP2	TIMP metallopeptidase inhibitor 2
25	ACTA2	Actin Alpha 2
26	DNASE1	Deoxyribonuclease-I
27	PRKDC	DNA-dependent protein kinase (PRKDC)
28	CXCL3	Chemokine (C-X-C motif) ligand 3
29	TGFB1	Transforming Growth Factor Beta 1
30	PTGES3	Prostaglandin E synthase 3 i
31	ACTB	Actin Beta
32	GDC	Genomic DNA Control
33	PTGS2	Prostaglandin-endoperoxide synthase 2 (prostaglandin G/H synthase and cyclooxygenase)
34	HPGDS	Hematopoietic prostaglandin D synthase
35	PTGS1	Prostaglandin-endoperoxide synthase 1 (prostaglandin G/H synthase and cyclooxygenase)
36	IL4	Interleukin-4
37	CXCL9	C-X-C motif chemokine ligand 9
38	CX3CL1	C-X3-C motif chemokine ligand 1
39	MMP9	matrix metallopeptidase 9
40	KISS1	KiSS-1 metastasis suppressor
41	PRDX6	Peroxiredoxin-6
42	BOLA-N	MHC class I antigen
43	PLA2G2A	Phospholipase A2 Group IIA
44	DNMT1	DNA methyltransferase 1
45	TGFB2	Transforming Growth Factor Beta 2
46	CCL2	Chemokine (C-C Motif) Ligand 2
47	TBP	TATA box binding protein
48	RTC	Reverse Transcription Control
49	HPGD	Hydroxyprostaglandin dehydrogenase 15-(NAD)
50	DAGLA	Diacylglycerol lipase, alpha
51	IL1B	Interleukin-1 beta
52	IL6	Interleukin-6
53	CXCL10	C-X-C motif chemokine ligand 10
54	CXCR3	C-X-C motif chemokine receptor 3
55	MMP12	matrix metallopeptidase 12
56	GNRHR	gonadotropin releasing hormone receptor
57	IL17A	Interleukin-17-alpha
58	KCTD11	Potassium Channel Tetramerisation Domain-Containing 11
59	OSTF1	Osteoclast Stimulating Factor -1
60	DNMT3A	DNA methyltransferase 3 alpha
61	RAB27A	Rab27A, , member RAS oncogene family
62	CCL3	Chemokine (C-C motif) ligand 3 (CCL3)
63	HPRT1	Hypoxanthine phosphoribosyltransferase 1
64	PPC	Positive PCR Control

## Sheet: CT Calculations
	Ct values
	Control																bCSC High Fert																				bCSC Low Fert
	No EXO bCSC 1		No EXO bCSC 2		RTC bCSC		TC bCSC		No EXO bEEL 1		No EXO bEEL 2		RTC bEEL		TC bEEL		1B		2B		3B		4B		5B		6B		7B		8B		9B		10B		28B		29B		30B		31B		32B		33B		34B
PLCB2	Undetermined	Undetermined	Undetermined	Undetermined	Undetermined	Undetermined	Undetermined	Undetermined	32.9202	Undetermined	38.2367	38.0605	Undetermined	Undetermined	Undetermined	Undetermined	Undetermined	Undetermined	16.9298	Undetermined	Undetermined	Undetermined	Undetermined	Undetermined	Undetermined	Undetermined	Undetermined	Undetermined	Undetermined	Undetermined	Undetermined	Undetermined	Undetermined	33.7272	Undetermined	Undetermined	Undetermined	Undetermined	Undetermined	Undetermined	Undetermined	Undetermined	Undetermined	Undetermined	Undetermined	Undetermined	Undetermined	Undetermined	Undetermined
PTGES	27.1754	27.2982	26.9805	26.9354	Undetermined	Undetermined	Undetermined	Undetermined	28.1443	30.6882	28.5959	28.3501	Undetermined	Undetermined	Undetermined	Undetermined	27.8	27.7261	27.5099	27.2855	27.7221	27.6538	28.2005	28.0018	27.3029	27.1857	27.1058	27.0652	27.4368	27.5541	27.5629	27.514	27.9537	27.7668	27.3015	27.4085	28.3379	28.0343	27.5199	27.5059	28.362	28.1801	27.7592	27.6753	27.2291	27.3709	27.9318	27.6417	27.4117
MGLL	30.6292	30.7913	31.8397	32.4865	Undetermined	35.99	Undetermined	Undetermined	23.2481	Undetermined	24.9943	25.0268	Undetermined	Undetermined	Undetermined	Undetermined	34.041	33.7511	31.9996	32.0549	32.994	33.5956	31.9962	32.2414	32.7524	32.3924	32.5456	34.2209	33.9413	33.3894	31.8944	31.627	34.8611	34.029	34.3702	32.725	32.9521	34.5838	34.723	34.0554	Undetermined	34.4115	32.8527	34.4258	34.1428	32.0058	34.2319	34.986	34.1337
IL1A	28.4001	28.4366	28.9837	28.6969	Undetermined	Undetermined	Undetermined	Undetermined	30.7622	25.9943	31.2479	31.4921	Undetermined	Undetermined	Undetermined	Undetermined	29.7674	29.9784	30.0117	30.1413	30.1279	29.5142	29.9024	29.9802	29.6304	29.5655	29.1778	29.4317	29.8639	29.7316	29.5261	29.2521	29.1875	29.4407	29.1122	29.659	30.1285	29.926	29.6216	29.5647	30.1337	29.9736	29.3221	28.9074	29.2698	28.9943	30.2226	29.9701	29.725
IL10	30.1296	30.2358	34.8607	33.4554	Undetermined	Undetermined	Undetermined	Undetermined	35.893	Undetermined	Undetermined	34.4822	Undetermined	Undetermined	Undetermined	Undetermined	34.2821	35.3797	33.3767	33.4843	35.452	33.5031	30.2238	30.6392	32.9211	32.3406	33.7879	33.0581	35.5792	34.8333	34.4646	33.8971	34.9727	33.9663	31.9162	32.4247	34.2471	Undetermined	34.6989	35.371	Undetermined	33.8861	34.9724	Undetermined	34.6854	32.2967	34.0434	35.3324	34.8956
CXCL11	30.2741	30.7146	Undetermined	Undetermined	Undetermined	Undetermined	Undetermined	Undetermined	Undetermined	32.1706	34.8089	Undetermined	Undetermined	Undetermined	Undetermined	Undetermined	33.7174	32.9056	32.7059	32.9158	Undetermined	34.5784	32.1681	32.548	34.846	34.3614	32.8171	33.6295	33.9145	33.9166	33.6841	Undetermined	32.3751	33.336	34.6059	Undetermined	35.3092	38.8253	34.4017	34.4575	Undetermined	34.7671	Undetermined	35.3849	34.398	32.67	34.9662	35.0075	32.1264
IFNG	30.3116	30.5649	Undetermined	Undetermined	Undetermined	Undetermined	Undetermined	Undetermined	Undetermined	26.3568	Undetermined	Undetermined	Undetermined	Undetermined	Undetermined	Undetermined	34.7978	35.0346	34.354	34.4516	33.2214	33.7857	31.824	32.0401	31.8993	Undetermined	34.627	32.5115	33.9034	32.3765	Undetermined	Undetermined	32.3611	34.3966	32.3402	32.9954	34.8645	35.9834	33.6869	Undetermined	34.5186	Undetermined	Undetermined	Undetermined	34.3703	33.2942	Undetermined	Undetermined	34.2591
TIMP1	21.3652	21.3806	20.9768	20.94	35.518	36.1985	Undetermined	Undetermined	22.0863	Undetermined	21.9406	21.9687	38.3398	39.4877	Undetermined	Undetermined	21.8197	21.7786	21.4249	21.4068	21.5338	21.5001	21.8124	21.8585	21.1825	21.1948	21.2207	21.2042	21.4202	21.5495	21.2476	21.2297	21.8203	21.8185	21.4422	21.4102	22.0099	21.9941	21.2079	21.195	22.3021	22.3791	21.5017	21.5724	21.0742	21.1214	21.7193	21.6736	21.6113
DES	19.5407	19.5432	19.2475	19.1692	33.9533	33.0026	Undetermined	Undetermined	34.6157	Undetermined	Undetermined	35.1494	36.9058	39.5006	38.1978	Undetermined	20.5357	20.291	20.1421	19.8978	20.2025	19.8387	20.6746	20.376	21.7896	21.5117	21.3925	21.3779	21.7184	21.765	20.1495	19.9175	19.6818	19.6807	19.7861	19.763	20.2279	20.0127	19.9352	19.6118	18.4649	18.3641	19.9762	19.7342	21.444	21.4129	22.2479	21.9678	18.9425
CL43	30.3455	30.4165	Undetermined	Undetermined	Undetermined	Undetermined	Undetermined	Undetermined	Undetermined	28.7765	Undetermined	Undetermined	Undetermined	Undetermined	Undetermined	38.3169	Undetermined	35.3006	33.8676	32.1004	34.2586	34.1816	31.5705	31.3643	32.387	33.4047	Undetermined	Undetermined	34.073	35.5843	Undetermined	Undetermined	35.3225	35.3826	Undetermined	Undetermined	Undetermined	Undetermined	34.0704	35.8601	Undetermined	35.5806	Undetermined	Undetermined	34.4251	Undetermined	Undetermined	Undetermined	36.1696
AHCY	24.6038	24.5058	24.2563	24.1843	Undetermined	Undetermined	Undetermined	Undetermined	23.9094	22.5485	24.0583	24.0222	Undetermined	Undetermined	Undetermined	Undetermined	24.9848	25.0906	24.5603	24.4354	25.2304	25.3363	25.4897	25.4499	24.8248	24.8637	24.9672	25.0191	24.9956	25.0497	24.5526	24.8283	25.2239	25.1292	25.0349	25.0071	25.212	25.2994	24.8019	24.7214	26.0102	26.079	24.8898	24.9288	24.987	24.8255	25.3375	25.3035	25.0401
IL12A	30.5782	30.5224	31.0678	31.5634	Undetermined	Undetermined	Undetermined	Undetermined	38.7713	29.015	34.8522	33.5031	37.7959	33.7149	38.3628	Undetermined	32.9299	32.1644	31.9919	32.3154	32.6907	31.8075	31.2051	31.7851	31.8013	31.951	32.5152	31.6402	30.2925	30.3636	31.5089	31.731	32.4286	31.9662	31.5659	31.5497	30.4885	30.3925	29.9647	29.9091	30.4901	30.1421	29.3171	29.128	31.5935	31.9	31.1532	30.186	31.9567
DNMT3B	28.2688	28.3583	28.0455	28.1467	Undetermined	Undetermined	Undetermined	Undetermined	28.2205	24.8381	28.0988	28.009	Undetermined	Undetermined	Undetermined	39.8213	29.0809	29.0159	28.6824	28.5928	29.0233	29.1212	29.1176	28.8991	28.6142	28.6001	28.3505	28.1779	28.4005	28.4387	28.3963	28.3134	29.124	29.2363	28.9848	28.7931	29.2247	29.281	29.0328	28.8613	29.6591	29.7887	28.3587	28.4912	28.3602	28.4843	29.0558	29.015	28.6245
TNF	29.1226	28.5669	34.2625	35.4944	Undetermined	Undetermined	Undetermined	Undetermined	33.9566	34.3132	33.2345	35.4844	Undetermined	Undetermined	Undetermined	Undetermined	32.9437	32.7103	34.6626	34.9595	33.2589	33.1461	32.2066	32.1692	34.5507	35.0377	32.8026	33.3406	32.3299	32.372	32.5955	31.8632	32.805	33.3636	35.5431	34.7401	34.4712	34.4007	30.7911	31.8311	32.9127	33.9627	32.9212	32.7386	35.3787	35.0204	34.8576	33.5399	32.2538
CCL4	30.9273	31.0428	Undetermined	Undetermined	Undetermined	34.006	Undetermined	Undetermined	Undetermined	23.7457	Undetermined	Undetermined	Undetermined	Undetermined	Undetermined	Undetermined	35.2017	33.9828	33.6855	33.9049	32.3998	32.8905	30.9971	30.4037	34.5319	33.1081	34.8285	35.3954	33.8898	34.1097	Undetermined	Undetermined	33.1454	34.7924	Undetermined	Undetermined	33.5839	34.6424	Undetermined	34.2249	Undetermined	Undetermined	34.7401	Undetermined	34.2173	Undetermined	Undetermined	Undetermined	35.0048
FAAH	28.1082	28.2014	27.9849	28.2396	Undetermined	Undetermined	Undetermined	Undetermined	28.945	28.8423	28.8201	28.7432	Undetermined	Undetermined	Undetermined	Undetermined	28.7831	28.6038	28.5624	28.671	28.6917	28.9427	29.1081	29.1175	28.5153	28.483	28.1858	28.1713	28.5869	28.4726	28.3025	28.1211	28.8571	28.8539	28.6177	28.816	29.2342	29.0617	28.5923	28.8988	29.1247	29.211	28.3051	28.3039	28.1961	28.1144	28.9781	28.8491	28.3662
PTGIS	30.2783	30.2948	30.6075	30.984	Undetermined	34.8137	Undetermined	Undetermined	Undetermined	Undetermined	Undetermined	35.3178	Undetermined	Undetermined	Undetermined	Undetermined	33.138	32.9623	31.148	31.2113	30.6396	30.116	30.4545	30.7192	31.9242	31.8756	29.4684	30.0116	31.4839	31.2008	30.9092	32.4999	31.6659	32.2308	30.2935	29.7575	35.0538	33.5978	31.3219	31.185	33.9251	33.2441	31.2117	32.3452	31.4517	32.1955	32.8438	31.4438	32.7568
PTGES2	27.8979	27.9131	27.3889	27.5075	Undetermined	Undetermined	Undetermined	Undetermined	27.7096	27.7002	27.5524	27.584	Undetermined	Undetermined	Undetermined	Undetermined	28.2575	28.2936	27.9742	28.0997	28.0463	28.2344	28.4643	28.4281	27.837	27.851	27.7323	27.6919	27.8824	27.9849	27.7086	27.7334	28.0175	28.085	27.8858	27.8443	28.3743	28.4797	27.8177	27.5394	28.8693	28.8545	27.8023	27.9859	27.8005	27.8297	28.2565	28.2456	27.9004
CXCL8	28.4534	28.3722	27.9901	28.1418	Undetermined	Undetermined	Undetermined	Undetermined	32.3476	32.9581	35.2221	35.304	Undetermined	Undetermined	Undetermined	Undetermined	28.8949	29.1255	28.9331	28.3342	29.9106	29.9616	29.8884	30.1384	29.1532	29.9151	27.3492	27.1465	29.5109	29.7238	27.3613	27.3957	27.56	27.3823	29.8962	30.0291	27.6197	27.2789	29.1451	29.9365	30.1482	30.1147	27.5567	27.5302	29.5663	29.6453	29.1672	29.694	26.8615
CXCL5	25.4925	25.6074	25.1937	25.2611	Undetermined	Undetermined	Undetermined	Undetermined	24.914	24.9838	24.737	24.7141	Undetermined	Undetermined	Undetermined	Undetermined	25.9744	25.7996	25.7612	25.7186	25.911	25.6785	26.2259	26.093	25.9392	25.3963	25.207	25.1203	25.4877	25.5841	24.9296	25.1178	25.8104	25.7244	25.4009	25.4657	26.0656	25.9979	25.1471	25.1307	26.2855	26.2184	25.3618	25.3728	25.0983	25.169	25.9769	25.8716	25.463
CXCL12	27.1019	27.0329	26.8522	27.0242	39.25	Undetermined	Undetermined	Undetermined	36.1048	Undetermined	33.3703	34.3222	Undetermined	Undetermined	Undetermined	Undetermined	28.0625	27.9041	27.4008	27.696	27.2442	27.3882	27.9831	27.9835	27.2246	27.1594	26.8702	26.7617	27.5048	27.5521	25.6087	25.6441	25.9104	25.919	27.38	27.3684	27.9425	28.3016	25.77	25.7709	28.2105	28.1732	27.2337	27.1383	26.9206	26.9463	27.4713	27.6574	25.4974
MMP7	29.4039	29.2926	29.7911	29.9494	36.0361	Undetermined	Undetermined	Undetermined	22.8382	22.8151	22.9324	22.9879	Undetermined	39.5603	Undetermined	Undetermined	30.6831	30.838	30.1488	29.9475	30.406	30.5504	29.5053	29.9182	30.2968	30.2941	30.0146	30.1375	30.446	30.0795	30.29	29.9146	30.4335	30.2176	30.1174	30.2097	30.9517	30.2424	30.6024	30.0208	31.3137	31.1975	30.5667	30.1277	30.4129	29.825	30.38	30.2818	30.5208
TIMP2	21.4161	21.431	21.1266	21.1839	Undetermined	Undetermined	Undetermined	39.858	25.2385	25.1542	25.1616	25.1126	Undetermined	Undetermined	Undetermined	Undetermined	22.3423	22.2767	22.1692	22.0631	22.3432	22.3146	22.5547	22.448	21.7972	21.742	21.5949	21.6659	21.7248	21.7733	21.422	21.7148	22.2095	22.2223	21.6763	21.7058	22.5495	22.4943	21.8345	21.884	22.4833	22.4944	21.8905	21.8821	21.6418	21.6005	22.2744	22.2707	21.8778
ACTA2	21.2208	21.1139	20.8702	21.029	35.4496	37.56	Undetermined	Undetermined	31.0906	32.3036	31.5809	31.0486	Undetermined	Undetermined	Undetermined	Undetermined	21.6046	21.5095	21.5832	21.5835	21.3678	21.3286	21.713	21.7338	20.9747	20.8979	20.9464	20.6651	21.0184	21.1327	20.6358	20.6508	21.2245	21.1935	20.8888	20.9186	21.8015	21.7422	21.2745	21.2531	21.899	21.9328	20.7251	20.7202	20.9809	20.9638	22.2875	22.3024	20.7927
DNASE1	27.4368	27.6429	27.7601	27.8085	Undetermined	Undetermined	Undetermined	Undetermined	27.7619	27.9388	27.4743	27.7493	Undetermined	Undetermined	Undetermined	Undetermined	28.2284	28.1978	28.2508	28.2907	28.1777	28.181	28.6602	28.4789	27.888	28.0081	27.7236	27.9228	28.0716	28.223	27.6403	27.6993	28.0357	28.062	28.1197	28.1637	28.7337	28.5745	28.2038	28.1153	29.4485	29.2525	28.0578	27.9467	27.7722	27.9369	28.8057	28.7155	28.0281
PRKDC	26.2493	26.1763	25.7508	25.75	Undetermined	Undetermined	Undetermined	Undetermined	27.1135	27.118	27.0964	27.2077	35.5199	Undetermined	Undetermined	Undetermined	26.9847	27.1086	27.0941	26.5957	26.8184	26.7101	27.4169	27.2833	26.5475	26.5129	26.158	26.1983	26.3097	26.4999	26.0519	26.1171	26.7603	26.7783	26.3806	26.4365	26.9149	27.0548	26.9566	26.4065	27.3908	27.4914	26.3268	26.2606	26.0386	26.1445	26.9696	26.9389	26.4805
CXCL3	27.5255	27.6037	27.3834	27.4028	Undetermined	Undetermined	Undetermined	Undetermined	31.9404	31.6227	31.4158	31.352	Undetermined	Undetermined	Undetermined	Undetermined	28.1044	28.2987	28.213	27.9957	28.2019	28.1199	28.2547	28.7029	27.9765	27.9675	27.6823	27.5608	27.9008	28.1034	27.8972	27.9331	28.1862	27.9023	27.8343	27.7805	28.9699	28.8868	28.0203	27.635	28.8279	28.6501	27.978	28.1359	27.4792	27.7367	28.6946	28.9929	28.0701
TGFB1	23.8889	23.3299	23.6438	23.6632	Undetermined	Undetermined	Undetermined	Undetermined	23.2148	23.2793	23.2129	23.1619	Undetermined	Undetermined	Undetermined	Undetermined	23.8709	23.8649	24.2948	24.309	24.1086	24.1235	24.7541	24.5927	24.0028	24	23.9101	23.837	23.7844	23.7666	23.8912	23.8704	24.2439	23.8906	23.8933	23.8531	24.4014	24.3702	23.8148	23.9737	24.5513	24.4277	23.929	23.9361	23.8955	23.8429	24.108	24.0639	24.0555
PTGES3	21.3825	22.2176	19.0289	20.6492	35.4204	35.5415	Undetermined	Undetermined	20.7356	20.9869	21.0111	21.0738	34.6136	35.9542	Undetermined	Undetermined	21.6467	21.6903	21.569	21.0932	20.6538	20.69	21.3574	21.3996	21.0322	21.0945	21.1002	21.2439	20.9834	20.9384	21.2014	21.1814	21.3937	21.394	21.3298	21.2884	21.8573	21.8594	21.3674	21.354	21.4	21.3766	21.4514	21.4398	20.7994	20.8487	21.3047	21.3355	21.1321
PTGS2	26.7759	26.7167	26.5902	26.6294	Undetermined	Undetermined	Undetermined	Undetermined	24.1221	24.058	24.1127	24.0257	Undetermined	Undetermined	Undetermined	Undetermined	27.9668	27.7265	27.4593	27.3592	27.4417	27.5203	27.8837	27.7666	27.1963	27.1403	27.1398	27.1131	27.4752	27.4634	27.1755	27.2587	28.9617	27.8944	27.0944	27.0615	27.4623	27.492	27.3383	27.3246	27.9359	28.0834	27.2935	27.3653	26.8418	26.8426	27.1513	27.0801	27.4002
HPGDS	31.1495	30.8946	34.2129	35.3839	34.9267	Undetermined	Undetermined	Undetermined	34.7967	Undetermined	Undetermined	Undetermined	Undetermined	Undetermined	Undetermined	Undetermined	35.0757	33.9848	33.4759	31.9379	33.555	33.2121	30.9345	31.5925	Undetermined	34.6013	34.8353	Undetermined	31.8845	33.1248	Undetermined	Undetermined	34.7849	34.9905	32.9546	Undetermined	Undetermined	34.9814	34.708	Undetermined	Undetermined	35.5221	Undetermined	Undetermined	Undetermined	34.55	33.1472	33.7116	33.1227
PTGS1	27.205	26.9942	27.1172	27.115	Undetermined	Undetermined	Undetermined	Undetermined	25.7896	25.8569	25.8449	25.8299	Undetermined	37.5236	Undetermined	Undetermined	27.7128	27.9865	27.8106	27.7028	27.852	27.8865	28.4007	28.1572	27.4226	27.5723	27.1875	27.2458	27.8111	27.8285	27.39	27.6917	27.8686	28.0531	27.7409	27.6576	27.9264	27.7841	27.3085	27.2867	28.4175	28.4976	27.2806	27.4544	27.1265	27.1727	27.9079	28.1031	27.5131
IL4	29.644	29.9884	30.6546	30.9088	Undetermined	Undetermined	Undetermined	Undetermined	31.3434	31.5731	31.5011	31.7809	Undetermined	Undetermined	Undetermined	Undetermined	31.8326	31.4252	32.8427	31.8925	31.2214	32.788	31.4866	31.9088	31.8839	31.6648	31.1924	32.2064	31.163	31.5459	30.2494	30.6977	31.9953	32.2297	31.6257	31.0999	32.117	31.5605	31.9586	32.3183	32.6207	32.2375	31.0574	31.0068	31.1938	31.6024	32.0419	31.6179	31.458
CXCL9	27.9761	27.8389	28.0288	28.1817	39.192	Undetermined	39.2296	38.7604	33.3999	Undetermined	Undetermined	Undetermined	Undetermined	Undetermined	Undetermined	38.0157	28.5335	28.6685	28.5807	28.7373	27.4291	27.2111	27.7514	27.8222	28.8441	28.9606	28.0636	28.0068	29.0659	29.0459	28.3992	28.5466	28.8061	28.8501	29.0858	29.196	28.1753	28.1457	27.5404	27.2304	30.1847	29.931	29.1701	29.1131	28.7087	28.9914	29.8191	29.5544	27.5472
CX3CL1	28.507	28.5684	28.9042	28.7739	Undetermined	Undetermined	Undetermined	Undetermined	29.6299	29.9465	29.6451	29.5688	Undetermined	Undetermined	Undetermined	Undetermined	29.7834	29.936	29.3521	29.1486	29.7866	29.8722	29.4045	29.5084	28.4122	28.1675	29.2117	29.3635	28.9969	29.1075	29.1808	29.5495	29.8045	29.8853	29.0056	29.2545	30.034	30.0094	29.457	29.2856	31.3251	31.182	29.489	29.5663	28.218	27.7756	29.3726	30.0619	29.6624
MMP9	28.4763	28.8717	32.3356	33.3495	Undetermined	Undetermined	Undetermined	Undetermined	33.7448	32.3753	32.1319	32.2267	34.7834	Undetermined	Undetermined	Undetermined	33.0636	31.5971	32.7371	32.1596	32.9284	33.1066	30.5256	30.6038	32.8185	32.9742	31.8513	31.8473	31.754	33.0618	33.4553	32.6192	33.457	32.4063	30.8181	31.6349	32.3899	32.9417	34.1774	33.1972	32.5244	34.0686	33.7818	31.3925	32.4299	33.4134	33.0475	33.0262	31.1442
KISS1	29.7734	30.1107	35.606	Undetermined	Undetermined	Undetermined	Undetermined	Undetermined	34.2114	Undetermined	34.5701	Undetermined	Undetermined	Undetermined	Undetermined	Undetermined	39.2325	33.2308	33.8853	34.0914	32.1661	33.2028	31.7152	32.6111	32.4434	32.8829	Undetermined	Undetermined	32.306	34.0611	34.5755	35.7474	31.5087	31.4536	34.2906	Undetermined	Undetermined	32.7601	Undetermined	32.9439	38.3706	Undetermined	34.866	Undetermined	32.8576	Undetermined	Undetermined	36.061	32.9579
PRDX6	21.5239	21.5981	21.0576	21.1019	34.4781	Undetermined	Undetermined	39.4103	21.9987	22.0814	22.0391	22.0734	Undetermined	Undetermined	Undetermined	Undetermined	21.9069	21.8767	21.4945	21.4462	21.8576	21.8139	22.191	22.1421	21.4644	21.4291	21.2842	21.2683	21.7474	21.8489	21.4519	21.4881	21.9863	21.9952	21.771	21.8114	22.0567	22.1898	21.5251	21.5147	22.4649	22.4067	21.6068	21.612	21.3184	21.3895	22.2351	22.1368	21.9043
BOLA-N	27.389	27.2913	26.868	26.9743	Undetermined	Undetermined	Undetermined	Undetermined	25.2303	25.1192	25.1299	25.1679	Undetermined	Undetermined	Undetermined	Undetermined	27.4187	27.6487	27.5992	27.5146	27.2085	27.1208	27.769	27.5811	27.0688	26.8	26.6749	26.6477	27.1123	27.1089	27.001	27.0603	27.2561	27.2833	26.9628	26.8657	27.7265	27.1824	27.405	26.7721	27.9935	27.8713	27.1746	27.2805	27.007	27.1149	27.5528	27.6147	26.9497
PLA2G2A	30.3103	30.3459	34.4558	35.2801	35.4101	37.2185	Undetermined	Undetermined	Undetermined	Undetermined	35.4352	35.1887	Undetermined	Undetermined	Undetermined	Undetermined	35.3943	34.7309	31.0244	32.3481	33.2823	32.5856	32.7315	32.703	35.2453	33.3574	33.6617	34.5883	32.6218	32.5034	34.6312	34.1769	32.6067	33.0911	35.1553	33.9581	31.8533	32.7157	33.6295	33.555	Undetermined	Undetermined	33.5653	34.7857	33.4548	33.9645	33.6552	Undetermined	33.183
DNMT1	25.3699	25.2874	25.0157	25.0642	Undetermined	Undetermined	Undetermined	Undetermined	26.5786	26.6775	26.6066	26.5104	Undetermined	Undetermined	Undetermined	Undetermined	25.9491	25.9364	25.8963	25.9061	26.1151	26.0391	26.3451	26.3689	25.7762	25.7532	25.5499	25.5249	25.8402	25.7661	25.4316	25.4571	26.1231	26.1458	25.6244	25.5673	26.3024	26.3202	25.6333	25.7318	26.5566	26.625	25.6374	25.5422	25.6376	25.5876	26.0308	26.0167	25.7743
TGFB2	25.1782	25.1428	24.6943	24.6768	Undetermined	Undetermined	Undetermined	Undetermined	22.7347	22.7166	22.6392	22.6516	Undetermined	Undetermined	Undetermined	Undetermined	25.7579	25.727	25.1617	25.2358	25.7826	25.7844	26.002	25.9922	25.1347	25.1491	25.1718	25.2752	25.439	25.3994	25.2911	25.2369	25.5326	25.5706	25.335	25.3485	25.8972	25.882	25.4166	25.3956	26.2172	26.1533	25.1765	25.2707	24.9799	25.0282	25.8246	25.7725	25.3369
CCL2	29.8059	29.3762	30.8389	30.5917	Undetermined	Undetermined	Undetermined	Undetermined	33.7488	Undetermined	36.1521	Undetermined	Undetermined	36.1147	Undetermined	Undetermined	31.5352	32.1451	32.0014	31.4255	29.5642	29.3307	31.1984	30.9785	31.632	31.3023	31.8632	31.3127	30.9067	31.0139	31.8841	31.7791	31.1027	31.1812	31.891	32.2771	30.2593	30.0198	31.8911	32.1741	32.1236	32.6635	31.656	31.3755	32.0209	30.9433	32.3918	31.7076	29.4572
HPGD	31.7184	31.4361	33.7397	33.9084	Undetermined	Undetermined	Undetermined	Undetermined	Undetermined	Undetermined	34.3123	35.4475	37.6655	Undetermined	Undetermined	Undetermined	32.8301	32.5316	34.2184	34.6479	33.1432	33.2613	32.0203	32.1953	32.863	32.7814	32.8389	31.9855	31.9557	30.9854	33.0959	32.5021	32.9926	34.007	32.9836	33.3129	33.6795	33.4328	31.1174	31.7163	32.8669	34.113	34.8176	29.6259	33.1907	32.1745	32.5111	33.4678	31.4822
DAGLA	28.4045	28.4831	28.7792	28.9787	Undetermined	Undetermined	Undetermined	Undetermined	30.6882	30.5367	30.0376	30.4319	Undetermined	Undetermined	Undetermined	Undetermined	29.9431	29.6988	29.4688	29.3916	29.3474	29.5323	29.5486	29.3136	29.3016	29.3674	29.2105	29.3167	29.3919	29.3778	29.1342	29.0668	29.2351	29.4191	29.195	29.3444	29.9317	29.9791	29.2813	29.1656	30.0622	30.3158	29.0052	29.1643	28.9623	28.9208	29.5041	29.564	29.2686
IL1B	29.5447	29.797	34.8327	34.8527	Undetermined	Undetermined	Undetermined	Undetermined	Undetermined	Undetermined	Undetermined	Undetermined	Undetermined	Undetermined	Undetermined	Undetermined	33.0855	32.3587	33.5704	33.2759	34.2896	34.3339	31.7328	32.8805	33.908	33.2806	35.4697	33.9283	32.7923	33.6974	Undetermined	Undetermined	Undetermined	32.8665	35.4986	Undetermined	34.0353	Undetermined	Undetermined	Undetermined	34.8171	33.5311	34.0113	32.7747	33.4828	31.8827	34.2979	Undetermined	33.3153
IL6	29.0889	29.2048	31.3964	30.7325	Undetermined	Undetermined	Undetermined	Undetermined	25.9943	26.1169	26.3174	26.2846	Undetermined	Undetermined	Undetermined	Undetermined	31.996	31.613	31.6055	31.9116	31.4667	33.9434	31.358	31.1135	31.5205	32.2907	31.9703	33.2293	32.2246	32.6391	31.5188	31.5454	32.0081	31.9552	31.2548	30.9732	31.5578	32.3647	31.9149	32.1036	31.8772	32.8123	31.9829	30.9759	30.7608	31.4552	32.8948	31.5443	31.9949
CXCL10	28.9976	28.8537	28.9973	29.0418	Undetermined	Undetermined	Undetermined	Undetermined	Undetermined	34.5274	Undetermined	Undetermined	Undetermined	Undetermined	Undetermined	Undetermined	30.0894	30.0638	29.0939	29.4583	29.9604	30.09	29.5916	29.5701	29.2544	29.1238	28.5334	28.4056	29.9456	29.7978	29.509	29.8563	29.8351	29.6444	29.6515	29.824	30.0243	30.0655	29.9039	29.66	29.9749	29.9175	29.6789	29.824	28.5555	29.0283	30.3539	30.442	29.6633
CXCR3	29.6952	29.8014	32.4395	31.9248	Undetermined	Undetermined	Undetermined	Undetermined	32.1706	34.1363	33.6249	34.0913	Undetermined	Undetermined	Undetermined	Undetermined	33.8551	33.8274	31.3808	33.6886	33.2487	33.1135	31.8487	32.1352	31.3462	31.4036	30.9255	31.1518	33.056	34.8604	32.1858	33.0902	31.2354	31.7085	33.7095	32.551	32.2939	31.2586	33.2647	32.9044	30.8856	33.1506	31.9633	31.947	31.3281	31.6914	34.956	33.9745	33.3974
MMP12	24.8328	24.9736	26.6397	27.3869	34.4114	34.858	Undetermined	Undetermined	26.3568	26.3447	26.1851	26.469	31.9882	32.3117	Undetermined	Undetermined	26.991	26.9075	27.6736	27.1732	26.3506	26.29	25.3259	25.232	26.4478	26.7326	25.99	26.2014	26.0517	26.1971	26.209	26.2232	26.0589	26.1726	26.3467	26.4364	27.1163	27.4136	27.2327	27.4752	27.9812	27.7939	26.8124	26.7789	26.9098	26.2903	27.8497	27.7306	26.569
GNRHR	29.381	29.1859	36.7803	Undetermined	34.1266	Undetermined	Undetermined	Undetermined	Undetermined	34.4062	Undetermined	Undetermined	Undetermined	Undetermined	Undetermined	Undetermined	32.2233	33.2064	31.9985	32.9762	33.7282	Undetermined	30.1271	30.3282	33.9142	32.4596	Undetermined	34.865	32.7268	33.3034	Undetermined	34.7208	33.7077	31.982	34.8319	34.6019	33.5469	32.9461	34.415	Undetermined	35.2672	34.4266	33.9948	34.2029	33.5577	33.7071	34.9284	35.3205	34.4281
IL17A	30.4923	31.0855	34.6863	33.6599	Undetermined	34.5431	Undetermined	Undetermined	Undetermined	34.7234	35.0037	Undetermined	Undetermined	34.911	Undetermined	Undetermined	34.895	35.4935	31.7659	32.6754	31.833	34.5875	32.3057	31.8585	34.2117	33.3446	34.4568	33.3951	33.1511	32.6597	34.7618	Undetermined	Undetermined	33.1332	Undetermined	34.6233	34.4768	33.4932	Undetermined	33.3009	Undetermined	Undetermined	34.7267	Undetermined	34.6772	Undetermined	33.8281	Undetermined	33.1865
KCTD11	28.9271	28.9788	28.5934	28.7526	Undetermined	Undetermined	Undetermined	Undetermined	28.7765	28.9061	28.4794	28.6784	Undetermined	Undetermined	Undetermined	Undetermined	29.444	29.4381	29.1203	29.0412	29.6487	29.7572	29.9449	29.8925	29.1228	29.1569	29.2083	29.1685	29.0902	29.3423	29.2305	29.2395	29.7424	29.7899	29.5556	29.6867	30.0235	30.0039	29.0743	29.1636	30.6706	30.6744	29.1047	29.115	29.2661	29.3708	29.8974	29.9195	29.6361
OSTF1	22.774	22.76	22.2374	22.215	Undetermined	Undetermined	39.116	Undetermined	22.5485	22.5655	22.2909	22.3861	Undetermined	35.3754	Undetermined	Undetermined	23.2619	23.2495	22.7431	22.7292	23.1809	23.1787	23.1692	23.1662	22.8953	22.8064	22.6999	22.7923	23.0169	23.0521	22.8535	22.825	22.917	22.9167	22.9232	22.8378	23.4955	23.3984	22.7351	22.8016	23.241	23.1761	22.7402	22.7602	22.7776	22.6901	23.3367	23.3485	22.9376
DNMT3A	30.5748	30.1185	31.9131	32.1059	39.8334	Undetermined	Undetermined	38.293	29.015	29.3747	30.4656	31.0204	37.5002	Undetermined	Undetermined	Undetermined	32.8429	31.9557	31.8267	32.6173	31.8973	32.4472	31.9116	31.6804	31.6678	31.9228	31.9458	31.3068	31.8934	32.0198	31.5921	32.2295	31.7893	32.2535	32.8811	32.946	30.6538	31.637	32.5776	33.0126	33.0498	33.8414	32.3373	32.004	31.6709	31.7002	32.5723	33.8403	32.8843
RAB27A	26.1423	26.119	26.0303	26.2073	Undetermined	Undetermined	Undetermined	Undetermined	24.8381	24.9884	24.4258	24.6173	Undetermined	Undetermined	Undetermined	Undetermined	26.7329	26.6833	26.7636	26.8849	26.9756	26.8295	27.1445	26.9917	26.1418	26.0479	26.0976	26.2727	26.5114	26.4703	26.2603	26.0954	26.8682	26.7961	26.2911	26.1886	27.1099	26.9069	26.0783	26.4596	27.2572	27.1623	26.4378	26.4276	26.0966	26.0389	26.9514	27.0342	26.2173
CCL3	29.4676	29.96	35.4115	Undetermined	Undetermined	Undetermined	Undetermined	39.6026	34.3132	Undetermined	38.4672	Undetermined	Undetermined	Undetermined	Undetermined	Undetermined	32.8629	35.0245	32.3815	32.3394	35.2583	34.8879	31.6365	31.3361	34.6398	33.3763	33.9686	37.7963	33.289	33.4849	Undetermined	35.4422	39.2581	35.5103	Undetermined	35.3957	33.6299	35.3743	36.3378	Undetermined	36.2347	35.5019	Undetermined	35.5129	Undetermined	Undetermined	35.2165	34.4747	33.6361
GAPDH	19.327	19.3496	18.6128	18.5971	32.6781	33.4168	Undetermined	Undetermined	19.3476	20.0403	19.366	19.2502	34.2128	35.5282	Undetermined	Undetermined	19.744	19.6724	19.0465	19.1283	18.5845	18.592	19.7085	19.7324	19.1464	19.164	18.9827	18.9904	19.2888	19.2813	19.1284	19.1378	19.2684	19.2623	19.0334	19.089	19.7006	19.6625	19.0499	19.0732	19.4615	19.4582	19.0944	19.0577	19.0625	19.0358	19.5162	19.5342	19.1491
ACTB	16.3036	16.2894	16.0186	15.9705	33.7799	33.855	Undetermined	Undetermined	17.0643	17.0761	17.0951	17.0708	32.8514	32.4746	Undetermined	Undetermined	16.8401	16.8194	16.6482	16.558	16.7214	16.724	16.9892	16.9932	16.2918	16.2747	16.1867	16.1902	16.5095	16.5136	16.2363	16.2471	16.9855	16.9638	16.5495	16.5476	17.2539	17.5676	16.6052	16.5071	16.4831	16.487	16.4604	16.4542	16.1389	16.1982	17.0695	17.0186	16.7442
TBP	25.6953	25.652	25.3979	25.6783	Undetermined	Undetermined	Undetermined	Undetermined	25.9537	26.0959	26.0184	26.2179	Undetermined	Undetermined	Undetermined	Undetermined	26.2861	26.0471	25.9668	25.9046	26.3446	26.3206	26.3348	26.2142	25.9131	25.8457	25.2725	25.4833	26.0123	26.1069	25.3468	25.4767	26.0359	26.2211	25.9182	26.0651	26.2259	25.9874	25.7829	25.7915	26.8379	26.5588	25.8973	25.8678	25.8418	25.7286	26.314	26.2847	25.9621
GDC	31.0184	31.0972	37.7479	Undetermined	Undetermined	Undetermined	Undetermined	Undetermined	Undetermined	Undetermined	35.4712	35.5587	Undetermined	Undetermined	Undetermined	Undetermined	Undetermined	33.5126	34.6846	32.9899	33.2188	Undetermined	30.2339	30.665	33.3916	34.752	33.5485	33.4358	31.433	33.4529	Undetermined	Undetermined	34.0533	35.1886	34.7196	33.543	35.2854	Undetermined	Undetermined	Undetermined	Undetermined	33.474	32.9024	33.4191	32.593	33.5878	Undetermined	34.9262	Undetermined
RTC	21.2759	21.3546	21.1811	21.3151	Undetermined	Undetermined	Undetermined	Undetermined	22.2692	22.3977	22.0478	22.0048	Undetermined	Undetermined	Undetermined	Undetermined	21.4321	21.4151	21.0851	21.1069	21.6199	21.5921	21.2224	21.2424	21.1861	21.1591	21.1653	21.2174	21.466	21.4949	21.3974	21.3349	21.1732	21.2821	21.2544	21.246	21.5976	21.5754	21.354	21.2781	21.7513	21.7859	21.4056	21.3779	21.1254	21.1693	21.1879	21.1203	21.5842
HPRT1	22.7463	22.7439	22.0672	22.1348	36.5998	Undetermined	Undetermined	Undetermined	23.7457	23.7423	23.8777	23.967	Undetermined	36.8427	Undetermined	Undetermined	23.2524	23.2368	22.5779	22.5255	23.17	23.1518	23.3726	23.3602	22.7623	22.7069	22.6498	22.7112	22.8588	22.9499	22.5743	22.5371	23.0426	23.1061	22.7454	22.7365	23.1081	23.265	22.8196	22.7997	23.3735	23.3721	22.9183	22.9386	22.7196	22.7388	22.9647	22.973	22.9264
PPC	21.3259	21.4652	21.4162	22.1684	21.1876	21.0539	20.0009	19.9734	20.0403	20.4973	19.9781	20.1199	20.784	20.5098	20.0137	20.1937	20.181	20.3485	21.8357	21.6366	20.3738	20.4779	20.4057	20.6279	20.5725	20.7938	20.109	20.51	20.0042	20.2143	20.4427	20.5454	20.5349	20.4818	20.2267	20.2621	20.7758	20.7183	20.522	20.5537	20.392	20.3033	20.7001	20.6804	20.0749	20.6403	21.0819	21.1427	20.2898
	delta Ct values		ct-av HKGct
	Control																bCSC High Fert																				bCSC Low Fert
	No EXO bCSC 1		No EXO bCSC 2		RTC bCSC		TC bCSC		No EXO bEEL 1		No EXO bEEL 2		RTC bEEL		TC bEEL		1B		2B		3B		4B		5B		6B		7B		8B		9B		10B		28B		29B		30B		31B		32B		33B		34B
PLCB2	#VALUE!	#VALUE!	#VALUE!	#VALUE!	#VALUE!	#VALUE!	#VALUE!	#VALUE!	12.0372	#VALUE!	17.3537	17.1775	#VALUE!	#VALUE!	#VALUE!	#VALUE!	#VALUE!	#VALUE!	-3.65162	#VALUE!	#VALUE!	#VALUE!	#VALUE!	#VALUE!	#VALUE!	#VALUE!	#VALUE!	#VALUE!	#VALUE!	#VALUE!	#VALUE!	#VALUE!	#VALUE!	13.1457	#VALUE!	#VALUE!	#VALUE!	#VALUE!	#VALUE!	#VALUE!	#VALUE!	#VALUE!	#VALUE!	#VALUE!	#VALUE!	#VALUE!	#VALUE!	#VALUE!	#VALUE!
PTGES	6.93441	7.05717	6.73947	6.69444	#VALUE!	#VALUE!	#VALUE!	#VALUE!	7.26127	9.80517	7.71285	7.46711	#VALUE!	#VALUE!	#VALUE!	#VALUE!	7.21854	7.14463	6.92839	6.70402	7.14066	7.07238	7.61907	7.42034	6.72148	6.60427	6.52431	6.48374	6.85538	6.97265	6.98146	6.9325	7.37221	7.1853	6.72	6.827	7.41605	7.11246	6.59813	6.58409	7.44014	7.25828	6.83743	6.7535	6.30733	6.44912	7.00994	6.71988	6.48992
MGLL	10.3882	10.5503	11.5987	12.2455	#VALUE!	2.55761	#VALUE!	#VALUE!	2.36505	#VALUE!	4.11128	4.14375	#VALUE!	#VALUE!	#VALUE!	#VALUE!	13.4595	13.1696	11.4181	11.4734	12.4125	13.0141	11.4148	11.6599	12.1709	11.811	11.9641	13.6394	13.3598	12.8079	11.3129	11.0455	14.2797	13.4475	13.7887	12.1436	12.0303	13.662	13.8012	13.1336	#VALUE!	13.4897	11.9309	13.504	13.221	11.084	13.3101	14.0642	13.2119
IL1A	8.15907	8.19565	8.74274	8.4559	#VALUE!	#VALUE!	#VALUE!	#VALUE!	9.87915	5.11124	10.3649	10.609	#VALUE!	#VALUE!	#VALUE!	#VALUE!	9.18596	9.39691	9.43025	9.55985	9.54645	8.93274	9.32094	9.39872	9.04892	8.98406	8.59629	8.85022	9.28239	9.15015	8.94466	8.67061	8.60601	8.85923	8.5307	9.07751	9.20666	9.00423	8.69977	8.64285	9.21185	9.05174	8.40031	7.98558	8.34796	8.07248	9.30075	9.04833	8.80316
IL10	9.8886	9.99477	14.6197	13.2144	#VALUE!	#VALUE!	#VALUE!	#VALUE!	15.01	#VALUE!	#VALUE!	13.5992	#VALUE!	#VALUE!	#VALUE!	#VALUE!	13.7006	14.7982	12.7952	12.9028	14.8706	12.9216	9.6423	10.0577	12.3397	11.7591	13.2064	12.4766	14.9977	14.2518	13.8831	13.3156	14.3913	13.3848	11.3347	11.8432	13.3253	#VALUE!	13.777	14.4492	#VALUE!	12.9643	14.0506	#VALUE!	13.7635	11.3749	13.1216	14.4106	13.9738
CXCL11	10.0331	10.4736	#VALUE!	#VALUE!	#VALUE!	#VALUE!	#VALUE!	#VALUE!	#VALUE!	11.2876	13.9259	#VALUE!	#VALUE!	#VALUE!	#VALUE!	#VALUE!	13.1359	12.3241	12.1244	12.3344	#VALUE!	13.9969	11.5866	11.9665	14.2645	13.7799	12.2356	13.048	13.3331	13.3351	13.1026	#VALUE!	11.7936	12.7545	14.0244	#VALUE!	14.3874	17.9035	13.4798	13.5357	#VALUE!	13.8453	#VALUE!	14.463	13.4762	11.7482	14.0444	14.0857	11.2046
IFNG	10.0706	10.3239	#VALUE!	#VALUE!	#VALUE!	#VALUE!	#VALUE!	#VALUE!	#VALUE!	5.4738	#VALUE!	#VALUE!	#VALUE!	#VALUE!	#VALUE!	#VALUE!	14.2164	14.4531	13.7725	13.8702	12.64	13.2043	11.2425	11.4586	11.3178	#VALUE!	14.0455	11.9301	13.3219	11.795	#VALUE!	#VALUE!	11.7796	13.8152	11.7587	12.414	13.9427	15.0616	12.765	#VALUE!	13.5968	#VALUE!	#VALUE!	#VALUE!	13.4485	12.3724	#VALUE!	#VALUE!	13.3373
TIMP1	1.12419	1.13961	0.735764	0.699048	2.08556	2.76603	#VALUE!	#VALUE!	1.20324	#VALUE!	1.05753	1.08566	4.57302	5.72092	#VALUE!	#VALUE!	1.23828	1.19718	0.843475	0.825326	0.952291	0.91864	1.2309	1.27703	0.601053	0.613351	0.639211	0.62273	0.838744	0.968076	0.666183	0.64828	1.23883	1.237	0.860721	0.828788	1.08808	1.07227	0.286081	0.273138	1.38029	1.45725	0.579882	0.650619	0.152407	0.199612	0.797521	0.751745	0.689438
DES	-0.700313	-0.697813	-0.993532	-1.07176	0.520818	-0.429885	#VALUE!	#VALUE!	13.7327	#VALUE!	#VALUE!	14.2664	3.13912	5.73391	#DIV/0!	#VALUE!	-0.0457408	-0.290509	-0.439358	-0.683676	-0.378972	-0.742751	0.0931276	-0.205477	1.20818	0.930215	0.811065	0.796443	1.13691	1.18354	-0.431985	-0.663928	-0.89967	-0.900786	-0.795397	-0.818505	-0.693949	-0.90914	-0.986591	-1.30999	-2.45694	-2.55774	-0.945624	-1.18761	0.522142	0.491037	1.3261	1.04601	-1.9793
CL43	10.1045	10.1755	#VALUE!	#VALUE!	#VALUE!	#VALUE!	#VALUE!	#VALUE!	#VALUE!	7.89344	#VALUE!	#VALUE!	#VALUE!	#VALUE!	#VALUE!	#DIV/0!	#VALUE!	14.7191	13.2862	11.5189	13.6772	13.6002	10.989	10.7828	11.8055	12.8233	#VALUE!	#VALUE!	13.4915	15.0029	#VALUE!	#VALUE!	14.741	14.8012	#VALUE!	#VALUE!	#VALUE!	#VALUE!	13.1486	14.9383	#VALUE!	14.6588	#VALUE!	#VALUE!	13.5033	#VALUE!	#VALUE!	#VALUE!	15.2478
AHCY	4.36278	4.26477	4.01531	3.94334	#VALUE!	#VALUE!	#VALUE!	#VALUE!	3.02632	1.66546	3.17522	3.1392	#VALUE!	#VALUE!	#VALUE!	#VALUE!	4.40335	4.5091	3.97888	3.85394	4.64892	4.75488	4.90824	4.86839	4.24332	4.28226	4.38572	4.43767	4.4141	4.46826	3.97118	4.24686	4.64246	4.54773	4.45346	4.42562	4.29021	4.37755	3.88006	3.79954	5.08837	5.15716	3.96799	4.00698	4.06523	3.90368	4.41567	4.38166	4.11832
IL12A	10.3372	10.2814	10.8269	11.3225	#VALUE!	#VALUE!	#VALUE!	#VALUE!	17.8883	8.13199	13.9691	12.62	4.02919	-0.051878	#DIV/0!	#VALUE!	12.3485	11.5829	11.4105	11.734	12.1093	11.226	10.6237	11.2036	11.2198	11.3695	11.9337	11.0588	9.71103	9.78217	10.9275	11.1496	11.8472	11.3847	10.9845	10.9682	9.56664	9.47068	9.04292	8.98725	9.5683	9.22029	8.39531	8.20619	10.6716	10.9782	10.2314	9.26423	11.0349
DNMT3B	8.02776	8.11731	7.80447	7.90566	#VALUE!	#VALUE!	#VALUE!	#VALUE!	7.33742	3.95511	7.21573	7.12595	#VALUE!	#VALUE!	#VALUE!	#DIV/0!	8.49944	8.43443	8.10093	8.01132	8.44183	8.5397	8.5361	8.31762	8.03276	8.01861	7.76903	7.59645	7.81901	7.85721	7.81484	7.73195	8.54257	8.65482	8.40338	8.2116	8.30292	8.35921	8.11099	7.93946	8.73727	8.86691	7.43687	7.56943	7.43839	7.56246	8.13397	8.09317	7.70264
TNF	8.88164	8.32588	14.0215	15.2534	#VALUE!	#VALUE!	#VALUE!	#VALUE!	13.0736	13.4302	12.3515	14.6014	#VALUE!	#VALUE!	#VALUE!	#VALUE!	12.3622	12.1289	14.0811	14.378	12.6774	12.5646	11.6251	11.5877	13.9693	14.4562	12.2211	12.7591	11.7484	11.7905	12.014	11.2817	12.2236	12.7821	14.9616	14.1586	13.5493	13.4789	9.86928	10.9093	11.9908	13.0409	11.9993	11.8168	14.4569	14.0986	13.9358	12.618	11.332
CCL4	10.6863	10.8018	#VALUE!	#VALUE!	#VALUE!	0.573598	#VALUE!	#VALUE!	#VALUE!	2.8627	#VALUE!	#VALUE!	#VALUE!	#VALUE!	#VALUE!	#VALUE!	14.6202	13.4013	13.104	13.3235	11.8183	12.309	10.4157	9.82225	13.9504	12.5267	14.247	14.8139	13.3083	13.5282	#VALUE!	#VALUE!	12.5639	14.2109	#VALUE!	#VALUE!	12.6621	13.7206	#VALUE!	13.3031	#VALUE!	#VALUE!	13.8183	#VALUE!	13.2954	#VALUE!	#VALUE!	#VALUE!	14.0829
FAAH	7.86718	7.96041	7.74393	7.99857	#VALUE!	#VALUE!	#VALUE!	#VALUE!	8.06193	7.95924	7.93702	7.86016	#VALUE!	#VALUE!	#VALUE!	#VALUE!	8.20163	8.02232	7.98092	8.08957	8.11022	8.36123	8.52666	8.53602	7.93388	7.90155	7.60436	7.58986	8.00545	7.8911	7.72102	7.53963	8.27564	8.27245	8.03627	8.23454	8.31241	8.13992	7.67044	7.97694	8.20287	8.28915	7.38332	7.38203	7.27433	7.19256	8.05628	7.92728	7.44438
PTGIS	10.0373	10.0538	10.3665	10.743	#VALUE!	1.38131	#VALUE!	#VALUE!	#VALUE!	#VALUE!	#VALUE!	14.4348	#VALUE!	#VALUE!	#VALUE!	#VALUE!	12.5565	12.3808	10.5666	10.6298	10.0581	9.5345	9.87305	10.1378	11.3427	11.2941	8.88697	9.4301	10.9025	10.6194	10.3277	11.9184	11.0845	11.6494	9.71201	9.176	14.132	12.676	10.4001	10.2632	13.0033	12.3223	10.2898	11.4234	10.5299	11.2737	11.922	10.522	11.835
PTGES2	7.65694	7.67215	7.14791	7.26654	#VALUE!	#VALUE!	#VALUE!	#VALUE!	6.82659	6.81721	6.66932	6.70095	#VALUE!	#VALUE!	#VALUE!	#VALUE!	7.67607	7.71213	7.39273	7.5182	7.46483	7.65296	7.88285	7.84661	7.25551	7.26953	7.15086	7.11048	7.30091	7.40341	7.12719	7.15199	7.43606	7.50355	7.30433	7.26287	7.45245	7.55786	6.89588	6.61761	7.94744	7.9327	6.88045	7.06409	6.87868	6.90787	7.33465	7.32376	6.97854
CXCL8	8.21243	8.13122	7.74913	7.90081	#VALUE!	#VALUE!	#VALUE!	#VALUE!	11.4645	12.075	14.3391	14.4209	#VALUE!	#VALUE!	#VALUE!	#VALUE!	8.31342	8.544	8.35162	7.75275	9.32912	9.38016	9.30689	9.55692	8.57177	9.33363	6.76777	6.56505	8.92939	9.14232	6.77986	6.8142	6.97856	6.80087	9.31472	9.44765	6.6979	6.3571	8.22327	9.01472	9.22635	9.19286	6.63487	6.60839	8.64446	8.72347	8.24542	8.77216	5.93972
CXCL5	5.25151	5.36636	4.95275	5.02013	#VALUE!	#VALUE!	#VALUE!	#VALUE!	4.03094	4.10078	3.85394	3.83105	#VALUE!	#VALUE!	#VALUE!	#VALUE!	5.39292	5.21811	5.17978	5.13709	5.32956	5.09704	5.64443	5.51157	5.3577	4.8148	4.62559	4.53882	4.90627	5.00267	4.34818	4.53631	5.22899	5.14291	4.81948	4.88428	5.14383	5.07609	4.22528	4.20891	5.36367	5.29663	4.43994	4.45097	4.17646	4.24721	5.0551	4.94978	4.54121
CXCL12	6.86095	6.79194	6.61119	6.78324	5.81751	#VALUE!	#VALUE!	#VALUE!	15.2217	#VALUE!	12.4872	13.4392	#VALUE!	#VALUE!	#VALUE!	#VALUE!	7.48108	7.32262	6.8193	7.11459	6.66269	6.80676	7.40167	7.402	6.64314	6.57795	6.2887	6.18022	6.92333	6.97064	5.02724	5.06262	5.3289	5.33757	6.79849	6.78694	7.02065	7.37975	4.84819	4.84913	7.28868	7.25137	6.31188	6.21644	5.99877	6.02451	6.54944	6.73556	4.57556
MMP7	9.16291	9.05164	9.55008	9.70844	2.60361	#VALUE!	#VALUE!	#VALUE!	1.95513	1.93202	2.04933	2.10486	#VALUE!	5.79358	#VALUE!	#VALUE!	10.1016	10.2566	9.56736	9.36601	9.82452	9.96892	8.92383	9.33671	9.71537	9.71262	9.4331	9.55602	9.86455	9.49803	9.70851	9.33315	9.85206	9.63614	9.53593	9.62826	10.0299	9.32062	9.68063	9.09894	10.3919	10.2757	9.64485	9.20593	9.49111	8.90319	9.45815	9.35996	9.59895
TIMP2	1.17509	1.18998	0.885586	0.94286	#VALUE!	#VALUE!	#VALUE!	#DIV/0!	4.35547	4.27113	4.27852	4.22953	#VALUE!	#VALUE!	#VALUE!	#VALUE!	1.76086	1.69525	1.58771	1.48164	1.76174	1.7331	1.9732	1.86649	1.21571	1.16054	1.01345	1.08447	1.14339	1.1918	0.840526	1.13331	1.62799	1.64086	1.09487	1.1243	1.6277	1.5725	0.912721	0.962169	1.5615	1.57258	0.968693	0.960295	0.719997	0.67865	1.35262	1.34886	0.956007
ACTA2	0.979855	0.872912	0.629242	0.788014	2.01719	4.1276	#VALUE!	#VALUE!	10.2076	11.4206	10.6979	10.1655	#VALUE!	#VALUE!	#VALUE!	#VALUE!	1.02314	0.928031	1.00172	1.00203	0.786346	0.747182	1.13152	1.15236	0.393239	0.316388	0.36494	0.083608	0.436986	0.551193	0.0543645	0.0692952	0.643018	0.612056	0.307292	0.337095	0.879635	0.820366	0.352728	0.331241	0.977135	1.01096	-0.196716	-0.20163	0.0590456	0.0420092	1.36564	1.38056	-0.129164
DNASE1	7.19578	7.40194	7.51913	7.56749	#VALUE!	#VALUE!	#VALUE!	#VALUE!	6.87882	7.05573	6.59126	6.86625	#VALUE!	#VALUE!	#VALUE!	#VALUE!	7.64694	7.61636	7.66934	7.70921	7.59627	7.59951	8.07874	7.89744	7.30656	7.42668	7.14213	7.3413	7.49012	7.64152	7.05882	7.1178	7.45425	7.48049	7.53828	7.58224	7.81185	7.65264	7.282	7.19345	8.52667	8.33067	7.136	7.02487	6.85036	7.01507	7.88388	7.79371	7.1063
PRKDC	6.00833	5.93527	5.50979	5.50904	#VALUE!	#VALUE!	#VALUE!	#VALUE!	6.23045	6.23492	6.21339	6.32467	1.75312	#VALUE!	#VALUE!	#VALUE!	6.40321	6.52713	6.51268	6.01424	6.23691	6.12861	6.83547	6.70188	5.96606	5.93146	5.57653	5.61683	5.72824	5.91841	5.47041	5.53564	6.17884	6.19682	5.79914	5.85499	5.99306	6.13301	6.03473	5.48466	6.46897	6.56961	5.40496	5.33874	5.11674	5.22264	6.04783	6.01706	5.55872
CXCL3	7.28448	7.36273	7.14245	7.16178	#VALUE!	#VALUE!	#VALUE!	#VALUE!	11.0574	10.7396	10.5328	10.469	#VALUE!	#VALUE!	#VALUE!	#VALUE!	7.52298	7.71724	7.63156	7.41427	7.62044	7.53844	7.67324	8.1214	7.39501	7.38605	7.10089	6.97936	7.31931	7.5219	7.31575	7.35166	7.60471	7.32082	7.25282	7.199	8.04811	7.96502	7.0985	6.71321	7.90608	7.72824	7.05615	7.2141	6.55737	6.81485	7.77277	8.07109	7.14826
TGFB1	3.64787	3.08886	3.40284	3.42218	#VALUE!	#VALUE!	#VALUE!	#VALUE!	2.33173	2.39628	2.32983	2.27882	#VALUE!	#VALUE!	#VALUE!	#VALUE!	3.28949	3.28347	3.71335	3.72755	3.52711	3.54201	4.17263	4.01122	3.42133	3.41854	3.32865	3.25554	3.20299	3.18516	3.30976	3.28892	3.66241	3.30918	3.31188	3.27161	3.47962	3.44839	2.89302	3.05185	3.62949	3.5059	3.00714	3.01427	2.97371	2.92107	3.18614	3.14207	3.13368
PTGES3	1.14153	1.9766	-1.21206	0.408242	1.98793	2.10907	#VALUE!	#VALUE!	-0.147418	0.103907	0.128071	0.190747	0.846914	2.18744	#VALUE!	#VALUE!	1.0652	1.10889	0.987556	0.511728	0.0723432	0.108568	0.775935	0.818122	0.450765	0.513048	0.518714	0.662437	0.40192	0.356941	0.619935	0.599937	0.812242	0.812513	0.748338	0.706901	0.93551	0.937578	0.44561	0.432155	0.478136	0.454765	0.529631	0.518017	-0.122406	-0.0730859	0.382919	0.413671	0.210316
PTGS2	6.53494	6.47566	6.34918	6.38842	#VALUE!	#VALUE!	#VALUE!	#VALUE!	3.23906	3.175	3.22966	3.14263	#VALUE!	#VALUE!	#VALUE!	#VALUE!	7.38533	7.14505	6.8778	6.77772	6.86019	6.93881	7.30227	7.18514	6.61486	6.55886	6.55833	6.53163	6.89375	6.88196	6.59402	6.67728	8.38023	7.31297	6.5129	6.48007	6.54045	6.57019	6.41653	6.40277	7.01412	7.16156	6.37168	6.44346	5.91994	5.92083	6.2295	6.15831	6.47838
HPGDS	10.9085	10.6536	13.9719	15.1429	1.49421	#VALUE!	#VALUE!	#VALUE!	13.9136	#VALUE!	#VALUE!	#VALUE!	#VALUE!	#VALUE!	#VALUE!	#VALUE!	14.4942	13.4034	12.8945	11.3565	12.9735	12.6307	10.353	11.011	#VALUE!	14.0198	14.2539	#VALUE!	11.303	12.5434	#VALUE!	#VALUE!	14.2034	14.4091	12.3731	#VALUE!	#VALUE!	14.0596	13.7862	#VALUE!	#VALUE!	14.6003	#VALUE!	#VALUE!	#VALUE!	13.6282	12.2254	12.7898	12.2009
PTGS1	6.96396	6.75319	6.87624	6.87406	#VALUE!	#VALUE!	#VALUE!	#VALUE!	4.90652	4.97389	4.96183	4.94686	#VALUE!	3.75685	#VALUE!	#VALUE!	7.13135	7.40507	7.22916	7.12138	7.27058	7.30506	7.8192	7.57576	6.84116	6.99081	6.60609	6.66438	7.22967	7.24702	6.80855	7.11023	7.28713	7.47163	7.15939	7.07614	7.00459	6.86229	6.38667	6.36485	7.49565	7.57573	6.35882	6.53255	6.20466	6.25088	6.98604	7.18123	6.59132
IL4	9.40304	9.74736	10.4136	10.6678	#VALUE!	#VALUE!	#VALUE!	#VALUE!	10.4603	10.6901	10.6181	10.8978	#VALUE!	#VALUE!	#VALUE!	#VALUE!	11.2512	10.8438	12.2612	11.311	10.64	12.2065	10.9051	11.3274	11.3025	11.0834	10.611	11.625	10.5815	10.9645	9.66791	10.1162	11.4138	11.6483	11.0443	10.5185	11.1952	10.6387	11.0367	11.3965	11.6988	11.3157	10.1356	10.085	10.272	10.6806	11.1201	10.6961	10.5362
CXCL9	7.73511	7.59791	7.78784	7.9407	5.75953	#VALUE!	#DIV/0!	#DIV/0!	12.5169	#VALUE!	#VALUE!	#VALUE!	#VALUE!	#VALUE!	#VALUE!	#DIV/0!	7.952	8.087	7.99922	8.15588	6.84764	6.62962	7.16991	7.24072	8.26263	8.37916	7.48212	7.42529	8.48441	8.46445	7.81771	7.96515	8.22468	8.26867	8.50429	8.61451	7.25346	7.22391	6.6186	6.30854	9.26286	9.00918	8.24829	8.19127	7.78692	8.06962	8.89724	8.6326	6.62536
CX3CL1	8.266	8.32743	8.66318	8.53286	#VALUE!	#VALUE!	#VALUE!	#VALUE!	8.74682	9.06348	8.76202	8.6858	#VALUE!	#VALUE!	#VALUE!	#VALUE!	9.20191	9.35454	8.77069	8.56718	9.20517	9.29071	8.82301	8.92689	7.83074	7.58606	8.63027	8.78205	8.41546	8.52603	8.59938	8.96801	9.22308	9.30384	8.42414	8.67303	9.11222	9.08759	8.53515	8.36375	10.4032	10.2601	8.56721	8.6445	7.2962	6.8538	8.45081	9.14007	8.74054
MMP9	8.23531	8.63072	12.0946	13.1085	#VALUE!	#VALUE!	#VALUE!	#VALUE!	12.8617	11.4923	11.2488	11.3437	1.01671	#VALUE!	#VALUE!	#VALUE!	12.4822	11.0157	12.1556	11.5782	12.3469	12.5252	9.94414	10.0223	12.2371	12.3927	11.2698	11.2659	11.1725	12.4803	12.8739	12.0377	12.8755	11.8248	10.2367	11.0534	11.4681	12.0198	13.2556	12.2754	11.6026	13.1468	12.86	10.4707	11.5081	12.4916	12.1257	12.1044	10.2224
KISS1	9.5324	9.8697	15.365	#VALUE!	#VALUE!	#VALUE!	#VALUE!	#VALUE!	13.3284	#VALUE!	13.687	#VALUE!	#VALUE!	#VALUE!	#VALUE!	#VALUE!	18.651	12.6494	13.3038	13.5099	11.5847	12.6214	11.1337	12.0297	11.862	12.3015	#VALUE!	#VALUE!	11.7245	13.4796	13.994	15.1659	10.9272	10.8721	13.7091	#VALUE!	#VALUE!	11.8383	#VALUE!	12.0221	17.4488	#VALUE!	13.9442	#VALUE!	11.9358	#VALUE!	#VALUE!	15.1391	12.036
PRDX6	1.28288	1.35707	0.816567	0.860861	1.0457	#VALUE!	#VALUE!	#DIV/0!	1.11568	1.19832	1.15604	1.19039	#VALUE!	#VALUE!	#VALUE!	#VALUE!	1.32546	1.29523	0.912992	0.864751	1.27618	1.2324	1.60958	1.56065	0.882951	0.847596	0.70272	0.686857	1.16594	1.26748	0.870445	0.906623	1.40481	1.41376	1.18955	1.22997	1.13487	1.26797	0.603332	0.592844	1.54313	1.48484	0.685011	0.69021	0.396538	0.467676	1.31333	1.21495	0.982494
BOLA-N	7.14798	7.05035	6.62705	6.73333	#VALUE!	#VALUE!	#VALUE!	#VALUE!	4.34727	4.23621	4.24688	4.28489	#VALUE!	#VALUE!	#VALUE!	#VALUE!	6.8372	7.0672	7.01774	6.93311	6.62702	6.53929	7.1875	6.99968	6.48733	6.21854	6.09343	6.06619	6.53086	6.52749	6.41957	6.47884	6.67461	6.70189	6.3813	6.28427	6.80469	6.26063	6.48315	5.85023	7.07166	6.94945	6.25273	6.35869	6.08513	6.19308	6.63097	6.69293	6.02793
PLA2G2A	10.0693	10.1049	14.2148	15.0391	1.97769	3.78601	#VALUE!	#VALUE!	#VALUE!	#VALUE!	14.5522	14.3056	#VALUE!	#VALUE!	#VALUE!	#VALUE!	14.8128	14.1494	10.4429	11.7667	12.7008	12.0041	12.15	12.1215	14.6638	12.7759	13.0803	14.0068	12.0403	11.922	14.0498	13.5954	12.0252	12.5096	14.5738	13.3766	10.9315	11.7939	12.7077	12.6332	#VALUE!	#VALUE!	12.6435	13.8639	12.5329	13.0427	12.7333	#VALUE!	12.2612
DNMT1	5.12888	5.04643	4.7747	4.82319	#VALUE!	#VALUE!	#VALUE!	#VALUE!	5.69556	5.79443	5.72357	5.62734	#VALUE!	#VALUE!	#VALUE!	#VALUE!	5.36762	5.35492	5.31487	5.32461	5.53367	5.45765	5.76359	5.78739	5.19469	5.17178	4.96842	4.94344	5.25869	5.18462	4.85012	4.87562	5.54163	5.56438	5.04298	4.98584	5.3806	5.39836	4.71148	4.81002	5.63474	5.70314	4.71554	4.62035	4.71576	4.66581	5.109	5.09488	4.85247
TGFB2	4.93717	4.90185	4.45333	4.43579	#VALUE!	#VALUE!	#VALUE!	#VALUE!	1.85166	1.83357	1.75621	1.76855	#VALUE!	#VALUE!	#VALUE!	#VALUE!	5.17648	5.14558	4.58025	4.65433	5.20115	5.20299	5.42049	5.41075	4.55328	4.56766	4.59035	4.69377	4.85751	4.81795	4.70961	4.65547	4.95113	4.98917	4.75351	4.76702	4.97542	4.96022	4.4948	4.47379	5.29534	5.2315	4.25466	4.34892	4.05812	4.10637	4.90275	4.85069	4.4151
CCL2	9.56487	9.13519	10.5979	10.3507	#VALUE!	#VALUE!	#VALUE!	#VALUE!	12.8657	#VALUE!	15.2691	#VALUE!	#VALUE!	2.34802	#VALUE!	#VALUE!	10.9537	11.5636	11.4199	10.8441	8.98278	8.7492	10.617	10.3971	11.0505	10.7209	11.2817	10.7313	10.3252	10.4324	11.3027	11.1977	10.5212	10.5998	11.3096	11.6956	9.33746	9.09794	10.9693	11.2523	11.2017	11.7417	10.7342	10.4537	11.0991	10.0215	11.47	10.7857	8.53542
HPGD	11.4774	11.1951	13.4987	13.6674	#VALUE!	#VALUE!	#VALUE!	#VALUE!	#VALUE!	#VALUE!	13.4292	14.5644	3.89877	#VALUE!	#VALUE!	#VALUE!	12.2486	11.9501	13.6369	14.0664	12.5617	12.6799	11.4388	11.6138	12.2816	12.1999	12.2574	11.404	11.3742	10.4039	12.5144	11.9206	12.4112	13.4255	12.4021	12.7314	12.7576	12.511	10.1956	10.7945	11.945	13.1912	13.8958	8.7041	12.2689	11.2527	11.5893	12.5459	10.5603
DAGLA	8.16348	8.24213	8.53819	8.73767	#VALUE!	#VALUE!	#VALUE!	#VALUE!	9.80517	9.65366	9.15459	9.54891	#VALUE!	#VALUE!	#VALUE!	#VALUE!	9.36162	9.11737	8.88738	8.81013	8.76598	8.95082	8.96718	8.73211	8.72011	8.7859	8.62904	8.73527	8.81044	8.79637	8.55278	8.48538	8.6536	8.83761	8.61352	8.76296	9.00985	9.05733	8.35952	8.24383	9.14042	9.39401	8.08338	8.24253	8.04051	7.99899	8.58229	8.64216	8.34679
IL1B	9.30374	9.55603	14.5917	14.6117	#VALUE!	#VALUE!	#VALUE!	#VALUE!	#VALUE!	#VALUE!	#VALUE!	#VALUE!	#VALUE!	#VALUE!	#VALUE!	#VALUE!	12.5041	11.7772	12.989	12.6945	13.7082	13.7525	11.1514	12.299	13.3265	12.6991	14.8882	13.3468	12.2108	13.1159	#VALUE!	#VALUE!	#VALUE!	12.285	14.9171	#VALUE!	13.1135	#VALUE!	#VALUE!	#VALUE!	13.8953	12.6093	13.0895	11.8529	12.561	10.9609	13.3761	#VALUE!	12.3935
IL6	8.84787	8.96376	11.1554	10.4916	#VALUE!	#VALUE!	#VALUE!	#VALUE!	5.11124	5.23383	5.43441	5.40161	#VALUE!	#VALUE!	#VALUE!	#VALUE!	11.4145	11.0315	11.0241	11.3302	10.8852	13.3619	10.7765	10.5321	10.9391	11.7093	11.3889	12.6478	11.6432	12.0576	10.9373	10.964	11.4266	11.3737	10.6733	10.3918	10.636	11.4429	10.9931	11.1818	10.9553	11.8905	11.0611	10.054	9.839	10.5333	11.973	10.6224	11.0731
CXCL10	8.75658	8.61273	8.75632	8.80081	#VALUE!	#VALUE!	#VALUE!	#VALUE!	#VALUE!	13.6443	#VALUE!	#VALUE!	#VALUE!	#VALUE!	#VALUE!	#VALUE!	9.5079	9.48232	8.51244	8.87685	9.37896	9.50855	9.01014	8.98865	8.6729	8.54234	7.95192	7.82418	9.36414	9.21633	8.9275	9.2748	9.25364	9.06295	9.07006	9.24255	9.10253	9.1437	8.98212	8.73816	9.05308	8.99572	8.75704	8.90221	7.63363	8.10647	9.43207	9.52015	8.74149
CXCR3	9.45424	9.5604	12.1985	11.6838	#VALUE!	#VALUE!	#VALUE!	#VALUE!	11.2876	13.2532	12.7418	13.2082	#VALUE!	#VALUE!	#VALUE!	#VALUE!	13.2737	13.2459	10.7994	13.1072	12.6673	12.5321	11.2673	11.5537	10.7648	10.8221	10.344	10.5703	12.4745	14.2789	11.6044	12.5088	10.6539	11.1271	13.1281	11.9695	11.3721	10.3368	12.3429	11.9826	9.96374	12.2287	11.0415	11.0251	10.4063	10.7696	14.0342	13.0526	12.4756
MMP12	4.59185	4.73258	6.3987	7.14589	0.978944	1.42556	#VALUE!	#VALUE!	5.4738	5.46168	5.30205	5.58598	-1.77851	-1.45508	#VALUE!	#VALUE!	6.40955	6.32607	7.09213	6.5917	5.76912	5.70856	4.74442	4.65053	5.86639	6.15114	5.40852	5.6199	5.4702	5.6156	5.62753	5.64169	5.47747	5.59117	5.76524	5.8549	6.19452	6.49181	6.31091	6.55335	7.05937	6.87213	5.89063	5.85706	5.98796	5.36853	6.92792	6.80877	5.64716
GNRHR	9.13998	8.94487	16.5393	#VALUE!	0.694173	#VALUE!	#VALUE!	#VALUE!	#VALUE!	13.5232	#VALUE!	#VALUE!	#VALUE!	#VALUE!	#VALUE!	#VALUE!	11.6418	12.625	11.417	12.3947	13.1468	#VALUE!	9.54563	9.74678	13.3327	11.8781	#VALUE!	14.2836	12.1453	12.7219	#VALUE!	14.1393	13.1262	11.4006	14.2505	14.0205	12.625	12.0243	13.4932	#VALUE!	14.3454	13.5048	13.073	13.2811	12.6358	12.7853	14.0066	14.3987	13.5063
IL17A	10.2513	10.8445	14.4453	13.4189	#VALUE!	1.11066	#VALUE!	#VALUE!	#VALUE!	13.8403	14.1207	#VALUE!	#VALUE!	1.14423	#VALUE!	#VALUE!	14.3135	14.9121	11.1844	12.0939	11.2516	14.006	11.7243	11.277	13.6302	12.7631	13.8754	12.8136	12.5697	12.0782	14.1803	#VALUE!	#VALUE!	12.5518	#VALUE!	14.0418	13.555	12.5714	#VALUE!	12.3791	#VALUE!	#VALUE!	13.8049	#VALUE!	13.7554	#VALUE!	12.9063	#VALUE!	12.2647
KCTD11	8.68612	8.73779	8.35245	8.51156	#VALUE!	#VALUE!	#VALUE!	#VALUE!	7.89344	8.02302	7.59641	7.79531	#VALUE!	#VALUE!	#VALUE!	#VALUE!	8.86253	8.8566	8.53887	8.45975	9.06724	9.17577	9.36344	9.31104	8.54135	8.57543	8.62687	8.58701	8.5087	8.7608	8.64899	8.658	9.16097	9.20845	8.97411	9.10524	9.10166	9.08207	8.15252	8.2418	9.7488	9.75256	8.18286	8.1932	8.3443	8.44902	8.97558	8.99767	8.71432
OSTF1	2.53299	2.51904	1.9964	1.97404	#VALUE!	#VALUE!	#DIV/0!	#VALUE!	1.66546	1.68246	1.40782	1.50302	#VALUE!	1.60868	#VALUE!	#VALUE!	2.68042	2.66804	2.16167	2.14778	2.5994	2.59719	2.58771	2.58469	2.31387	2.22492	2.1184	2.21081	2.43542	2.47063	2.27205	2.24351	2.33555	2.33524	2.34169	2.25634	2.57363	2.47657	1.81325	1.87976	2.31917	2.25427	1.81841	1.83838	1.85576	1.76832	2.41491	2.42667	2.01581
DNMT3A	10.3338	9.87752	11.6722	11.8649	6.40098	#VALUE!	#VALUE!	#DIV/0!	8.13199	8.49166	9.58258	10.1373	3.73343	#VALUE!	#VALUE!	#VALUE!	12.2614	11.3743	11.2453	12.0358	11.3158	11.8657	11.3302	11.099	11.0863	11.3414	11.3644	10.7253	11.312	11.4383	11.0107	11.648	11.2079	11.6721	12.2996	12.3646	9.73199	10.7151	11.6557	12.0908	12.128	12.9196	11.4155	11.0822	10.7491	10.7784	11.6505	12.9184	11.9625
RAB27A	5.90126	5.87798	5.78931	5.96627	#VALUE!	#VALUE!	#VALUE!	#VALUE!	3.95511	4.10535	3.54277	3.73423	#VALUE!	#VALUE!	#VALUE!	#VALUE!	6.15146	6.10181	6.18209	6.30344	6.39414	6.24802	6.56301	6.41025	5.56032	5.46643	5.51617	5.69124	5.92989	5.88884	5.67881	5.51397	6.28677	6.21468	5.7096	5.60714	6.18806	5.98511	5.15646	5.53781	6.33538	6.24051	5.51595	5.50581	5.17478	5.11704	6.02955	6.11237	5.29546
CCL3	9.22664	9.71905	15.1705	#VALUE!	#VALUE!	#VALUE!	#VALUE!	#DIV/0!	13.4302	#VALUE!	17.5842	#VALUE!	#VALUE!	#VALUE!	#VALUE!	#VALUE!	12.2814	14.443	11.8	11.7579	14.6768	14.3065	11.055	10.7546	14.0583	12.7948	13.3871	17.2149	12.7076	12.9034	#VALUE!	14.8607	18.6766	14.9289	#VALUE!	14.8142	12.7081	14.4525	15.416	#VALUE!	15.3128	14.5801	#VALUE!	14.5911	#VALUE!	#VALUE!	14.2947	13.5529	12.7143
GAPDH	-0.913967	-0.891391	-1.62823	-1.64392	-0.754355	-0.015605	#VALUE!	#VALUE!	-1.53541	-0.842767	-1.51701	-1.63284	0.4461	1.76143	#VALUE!	#VALUE!	-0.8375	-0.909079	-1.53494	-1.45321	-1.99696	-1.98948	-0.872914	-0.849068	-1.43504	-1.41742	-1.5988	-1.59107	-1.29262	-1.30016	-1.45304	-1.44365	-1.31302	-1.31914	-1.5481	-1.49251	-1.2212	-1.25935	-1.87189	-1.8486	-1.4603	-1.46364	-1.82738	-1.86408	-1.8593	-1.88602	-1.40558	-1.38763	-1.77273
ACTB	-3.93737	-3.95164	-4.22243	-4.27047	0.347428	0.422532	#VALUE!	#VALUE!	-3.8187	-3.80695	-3.78794	-3.81223	-0.91538	-1.29215	#VALUE!	#VALUE!	-3.74133	-3.76208	-3.93325	-4.0235	-3.86006	-3.85745	-3.59225	-3.58824	-4.28968	-4.3068	-4.39473	-4.39129	-4.07196	-4.06789	-4.34512	-4.33438	-3.59598	-3.61771	-4.03192	-4.03387	-3.66796	-3.35426	-4.31667	-4.41472	-4.43876	-4.43486	-4.46141	-4.46761	-4.78293	-4.7236	-3.85234	-3.90322	-4.17766
TBP	5.45426	5.41096	5.15689	5.43729	#VALUE!	#VALUE!	#VALUE!	#VALUE!	5.07066	5.2129	5.13537	5.33491	#VALUE!	#VALUE!	#VALUE!	#VALUE!	5.70467	5.46559	5.38535	5.32311	5.76315	5.73913	5.7533	5.63276	5.33168	5.26421	4.69108	4.90181	5.43079	5.52548	4.76538	4.89527	5.45442	5.63963	5.33677	5.4836	5.30409	5.06554	4.86108	4.86972	5.91605	5.63696	4.97553	4.946	4.91998	4.80679	5.3922	5.36286	5.04028
GDC	10.7774	10.8562	17.5069	#VALUE!	#VALUE!	#VALUE!	#VALUE!	#VALUE!	#VALUE!	#VALUE!	14.5882	14.6757	#VALUE!	#VALUE!	#VALUE!	#VALUE!	#VALUE!	12.9312	14.1031	12.4085	12.6373	#VALUE!	9.65248	10.0835	12.8102	14.1705	12.967	12.8544	10.8515	12.8714	#VALUE!	#VALUE!	13.4719	14.6071	14.1382	12.9615	14.3636	#VALUE!	#VALUE!	#VALUE!	#VALUE!	12.5522	11.9806	12.4973	11.6711	12.666	#VALUE!	14.0044	#VALUE!
RTC	1.03492	1.11364	0.94014	1.07412	#VALUE!	#VALUE!	#VALUE!	#VALUE!	1.38615	1.51464	1.16476	1.12172	#VALUE!	#VALUE!	#VALUE!	#VALUE!	0.850608	0.833608	0.503621	0.525474	1.03846	1.01066	0.640924	0.660978	0.604682	0.577623	0.583791	0.635959	0.884574	0.913455	0.815929	0.753463	0.591779	0.700649	0.672975	0.664497	0.675749	0.653578	0.432155	0.356285	0.829525	0.86409	0.483772	0.456102	0.203548	0.247471	0.266121	0.198484	0.662346
HPRT1	2.50529	2.50291	1.82626	1.89381	3.16734	#VALUE!	#VALUE!	#VALUE!	2.8627	2.85928	2.99463	3.08398	#VALUE!	3.07595	#VALUE!	#VALUE!	2.67094	2.65529	1.99642	1.94404	2.58849	2.57032	2.79111	2.77872	2.18083	2.12546	2.06838	2.12976	2.27738	2.36839	1.99284	1.95564	2.46113	2.52467	2.16395	2.155	2.18629	2.34315	1.89775	1.87791	2.45164	2.45028	1.99645	2.0168	1.79778	1.81698	2.04291	2.05119	2.00455
PPC	1.08489	1.22419	1.17521	1.92743	-12.2449	-12.3785	#DIV/0!	#DIV/0!	-0.842767	-0.385696	-0.904909	-0.763122	-12.9828	-13.257	#DIV/0!	#DIV/0!	-0.40049	-0.232989	1.25424	1.05511	-0.207678	-0.103583	-0.175736	0.0464357	-0.00898425	0.21231	-0.472455	-0.0714804	-0.577286	-0.367154	-0.138768	-0.0360247	-0.0465132	-0.099652	-0.354764	-0.31938	-0.146048	-0.203543	-0.399855	-0.368113	-0.529827	-0.618506	-0.221678	-0.241385	-0.846869	-0.281548	0.16004	0.220867	-0.631972
delta delta Ct values			d Ct-cal
	Control																bCSC High Fert																				bCSC Low Fert
	No EXO bCSC 1		No EXO bCSC 2		RTC bCSC		TC bCSC		No EXO bEEL 1		No EXO bEEL 2		RTC bEEL		TC bEEL		1B		2B		3B		4B		5B		6B		7B		8B		9B		10B		28B		29B		30B		31B		32B		33B		34B
PLCB2	#VALUE!	#VALUE!	#VALUE!	#VALUE!	#VALUE!	#VALUE!	#VALUE!	#VALUE!	#VALUE!	#VALUE!	#VALUE!	#VALUE!	#VALUE!	#VALUE!	#VALUE!	#VALUE!	#VALUE!	#VALUE!	#VALUE!	#VALUE!	#VALUE!	#VALUE!	#VALUE!	#VALUE!	#VALUE!	#VALUE!	#VALUE!	#VALUE!	#VALUE!	#VALUE!	#VALUE!	#VALUE!	#VALUE!	#VALUE!	#VALUE!	#VALUE!	#VALUE!	#VALUE!	#VALUE!	#VALUE!	#VALUE!	#VALUE!	#VALUE!	#VALUE!	#VALUE!	#VALUE!	#VALUE!	#VALUE!	#VALUE!
PTGES	0.0780396	0.200797	-0.116899	-0.161937	#VALUE!	#VALUE!	#VALUE!	#VALUE!	-0.800326	1.74357	-0.348753	-0.594489	#VALUE!	#VALUE!	#VALUE!	#VALUE!	0.362171	0.288261	0.0720189	-0.152348	0.284288	0.216005	0.762697	0.563968	-0.13489	-0.252099	-0.332059	-0.372636	-0.000996272	0.116273	0.125089	0.0761236	0.515832	0.328924	-0.136374	-0.0293738	0.559677	0.25609	-0.258246	-0.272284	0.583769	0.401907	-0.0189459	-0.102869	-0.549044	-0.40725	0.153572	-0.13649	-0.366455
MGLL	-0.807437	-0.645404	0.403035	1.04981	#VALUE!	-8.63806	#VALUE!	#VALUE!	-1.17498	#VALUE!	0.571255	0.60372	#VALUE!	#VALUE!	#VALUE!	#VALUE!	2.26383	1.97398	0.222455	0.277747	1.21685	1.81847	0.219089	0.464252	0.975223	0.615283	0.768432	2.44377	2.16415	1.61223	0.117273	-0.150134	3.08401	2.25187	2.59306	0.947902	0.834652	2.46635	2.60556	1.93796	#VALUE!	2.29405	0.735245	2.30835	2.02531	-0.111687	2.11442	2.86848	2.01625
IL1A	-0.229268	-0.192692	0.3544	0.0675597	#VALUE!	#VALUE!	#VALUE!	#VALUE!	0.888074	-3.87984	1.37382	1.61794	#VALUE!	#VALUE!	#VALUE!	#VALUE!	0.797617	1.00858	1.04191	1.17151	1.15811	0.544403	0.932604	1.01039	0.660576	0.595719	0.207953	0.461884	0.894055	0.761813	0.556319	0.282269	0.217669	0.470887	0.142363	0.689167	0.818322	0.615889	0.311433	0.254515	0.823508	0.663401	0.0119713	-0.402763	-0.0403778	-0.315854	0.91241	0.659993	0.414817
IL10	-2.04079	-1.93462	2.69035	1.28506	#VALUE!	#VALUE!	#VALUE!	#VALUE!	0.705412	#VALUE!	#VALUE!	-0.705412	#VALUE!	#VALUE!	#VALUE!	#VALUE!	1.77126	2.86884	0.865836	0.97346	2.94117	0.992205	-2.28708	-1.87165	0.410284	-0.170248	1.27702	0.547224	3.06835	2.32241	1.95376	1.38625	2.46189	1.45544	-0.594654	-0.0861718	1.39587	#VALUE!	1.84765	2.51979	#VALUE!	1.03489	2.12117	#VALUE!	1.83415	-0.554479	1.19217	2.4812	2.04437
CXCL11	-0.22027	0.22027	#VALUE!	#VALUE!	#VALUE!	#VALUE!	#VALUE!	#VALUE!	#VALUE!	-1.31917	1.31917	#VALUE!	#VALUE!	#VALUE!	#VALUE!	#VALUE!	2.88257	2.07073	1.87107	2.081	#VALUE!	3.74352	1.33324	1.71313	4.01115	3.52655	1.98224	2.79466	3.07971	3.08175	2.84923	#VALUE!	1.54023	2.50116	3.77106	#VALUE!	4.13405	7.65009	3.22647	3.28233	#VALUE!	3.59196	#VALUE!	4.20967	3.22279	1.49481	3.79104	3.8323	0.951215
IFNG	-0.126663	0.126663	#VALUE!	#VALUE!	#VALUE!	#VALUE!	#VALUE!	#VALUE!	#VALUE!	0	#VALUE!	#VALUE!	#VALUE!	#VALUE!	#VALUE!	#VALUE!	4.0191	4.25586	3.57525	3.67288	2.4427	3.007	1.04526	1.26136	1.12056	#VALUE!	3.84822	1.7328	3.12465	1.59774	#VALUE!	#VALUE!	1.58237	3.61788	1.56144	2.21671	3.74544	4.86435	2.56777	#VALUE!	3.39955	#VALUE!	#VALUE!	#VALUE!	3.25126	2.17511	#VALUE!	#VALUE!	3.14
TIMP1	0.199539	0.214958	-0.18889	-0.225607	1.1609	1.84137	#VALUE!	#VALUE!	0.0877603	#VALUE!	-0.0579459	-0.0298144	3.45755	4.60544	#VALUE!	#VALUE!	0.31363	0.272527	-0.0811798	-0.0993282	0.0276364	-0.00601498	0.306245	0.352378	-0.323602	-0.311303	-0.285443	-0.301925	-0.08591	0.0434216	-0.258472	-0.276374	0.314179	0.312346	-0.0639335	-0.0958664	0.163421	0.147617	-0.638573	-0.651517	0.455636	0.532594	-0.344773	-0.274035	-0.772248	-0.725043	-0.127133	-0.172909	-0.235217
DES	0.165542	0.168043	-0.127676	-0.205908	1.38667	0.43597	#VALUE!	#VALUE!	-0.266863	#VALUE!	#VALUE!	0.266863	-10.8604	-8.26561	#DIV/0!	#VALUE!	0.820114	0.575346	0.426497	0.182179	0.486883	0.123104	0.958983	0.660378	2.07404	1.79607	1.67692	1.6623	2.00277	2.0494	0.433871	0.201928	-0.0338151	-0.0349309	0.0704578	0.0473502	0.171906	-0.0432846	-0.120736	-0.444133	-1.59108	-1.69188	-0.0797683	-0.32175	1.388	1.35689	2.19196	1.91187	-1.11344
CL43	-0.0355129	0.0355129	#VALUE!	#VALUE!	#VALUE!	#VALUE!	#VALUE!	#VALUE!	#VALUE!	#VALUE!	#VALUE!	#VALUE!	#VALUE!	#VALUE!	#VALUE!	#DIV/0!	#VALUE!	4.57912	3.14615	1.37892	3.53713	3.46017	0.848981	0.642825	1.66549	2.68325	#VALUE!	#VALUE!	3.35149	4.86283	#VALUE!	#VALUE!	4.60099	4.66115	#VALUE!	#VALUE!	#VALUE!	#VALUE!	3.00861	4.79827	#VALUE!	4.51875	#VALUE!	#VALUE!	3.36328	#VALUE!	#VALUE!	#VALUE!	5.10774
AHCY	0.21623	0.118221	-0.131241	-0.203211	#VALUE!	#VALUE!	#VALUE!	#VALUE!	0.27477	-1.08609	0.423671	0.387653	#VALUE!	#VALUE!	#VALUE!	#VALUE!	0.2568	0.362544	-0.16767	-0.292613	0.502372	0.608329	0.761689	0.721843	0.0967644	0.135709	0.239167	0.291119	0.267548	0.321706	-0.17537	0.100308	0.495911	0.401183	0.30691	0.279065	0.143661	0.231	-0.266495	-0.347008	0.941823	1.01061	-0.178565	-0.139577	-0.0813185	-0.242867	0.269117	0.235113	-0.0282313
IL12A	-0.354782	-0.410572	0.134875	0.630478	#VALUE!	#VALUE!	#VALUE!	#VALUE!	4.73589	-5.02037	0.816785	-0.532313	-9.12317	-13.2042	#DIV/0!	#VALUE!	1.6565	0.890964	0.7185	1.04199	1.4173	0.534028	-0.0682971	0.511634	0.527826	0.677568	1.24172	0.366794	-0.980948	-0.90981	0.235498	0.457595	1.1552	0.692752	0.292503	0.276222	-1.12534	-1.22129	-1.64905	-1.70473	-1.12367	-1.47169	-2.29667	-2.48578	-0.0203363	0.286192	-0.460543	-1.42775	0.342947
DNMT3B	0.0639606	0.153511	-0.159329	-0.0581422	#VALUE!	#VALUE!	#VALUE!	#VALUE!	0.928865	-2.45345	0.807182	0.717398	#VALUE!	#VALUE!	#VALUE!	#DIV/0!	0.535641	0.470631	0.137133	0.04752	0.478033	0.575905	0.5723	0.353825	0.0689643	0.0548061	-0.194772	-0.367351	-0.144787	-0.106586	-0.148958	-0.231847	0.578766	0.691017	0.439577	0.247799	0.339116	0.395413	0.147187	-0.0243408	0.773467	0.903115	-0.526929	-0.394368	-0.525409	-0.401344	0.170171	0.129367	-0.261157
TNF	-2.73896	-3.29472	2.40086	3.63283	#VALUE!	#VALUE!	#VALUE!	#VALUE!	-0.290556	0.066	-1.01264	1.2372	#VALUE!	#VALUE!	#VALUE!	#VALUE!	0.741611	0.508247	2.46052	2.75741	1.05679	0.943996	0.00454315	-0.0328981	2.34866	2.83562	0.60054	1.13851	0.127838	0.169929	0.393398	-0.338902	0.602947	1.16154	3.34103	2.53803	1.92873	1.85828	-1.75133	-0.711275	0.370243	1.4203	0.378731	0.196217	2.83633	2.47796	2.31519	0.997433	-0.288616
CCL4	-0.0577488	0.0577488	#VALUE!	#VALUE!	#VALUE!	-10.1704	#VALUE!	#VALUE!	#VALUE!	#VALUE!	#VALUE!	#VALUE!	#VALUE!	#VALUE!	#VALUE!	#VALUE!	3.8762	2.65731	2.35999	2.57946	1.07429	1.56501	-0.32834	-0.921764	3.2064	1.78266	3.50302	4.06991	2.56432	2.78422	#VALUE!	#VALUE!	1.81988	3.46693	#VALUE!	#VALUE!	1.91811	2.97661	#VALUE!	2.55907	#VALUE!	#VALUE!	3.0743	#VALUE!	2.55142	#VALUE!	#VALUE!	#VALUE!	3.33893
FAAH	-0.0253458	0.0678911	-0.148591	0.106046	#VALUE!	#VALUE!	#VALUE!	#VALUE!	0.107344	0.00465059	-0.0175662	-0.0944285	#VALUE!	#VALUE!	#VALUE!	#VALUE!	0.309109	0.129799	0.088394	0.19705	0.217701	0.468708	0.634136	0.643501	0.0413531	0.00903114	-0.28816	-0.302658	0.112926	-0.00142304	-0.171501	-0.35289	0.383119	0.379932	0.143743	0.342018	0.41989	0.247401	-0.22208	0.0844177	0.310345	0.396626	-0.509199	-0.510488	-0.61819	-0.699958	0.16376	0.0347598	-0.448139
PTGIS	-0.262895	-0.246336	0.0663953	0.442835	#VALUE!	-8.91885	#VALUE!	#VALUE!	#VALUE!	#VALUE!	#VALUE!	0	#VALUE!	#VALUE!	#VALUE!	#VALUE!	2.25639	2.08065	0.266429	0.329692	-0.242049	-0.765658	-0.427107	-0.16239	1.04258	0.993987	-1.41318	-0.870059	0.602321	0.319228	0.0275834	1.61827	0.784303	1.34922	-0.588141	-1.12415	3.8318	2.37583	0.099901	-0.0369207	2.70314	2.02216	-0.0103056	1.12324	0.229698	0.973533	1.62181	0.22184	1.53484
PTGES2	0.221053	0.236268	-0.287972	-0.169349	#VALUE!	#VALUE!	#VALUE!	#VALUE!	0.073072	0.0636954	-0.0842004	-0.052567	#VALUE!	#VALUE!	#VALUE!	#VALUE!	0.240188	0.276247	-0.0431558	0.0823172	0.0289458	0.217075	0.44697	0.410728	-0.180372	-0.166353	-0.285021	-0.325401	-0.134977	-0.0324728	-0.308697	-0.283896	0.00017341	0.0676649	-0.131554	-0.173016	0.0165695	0.121979	-0.540006	-0.818279	0.511553	0.496813	-0.555439	-0.371793	-0.557209	-0.528015	-0.101234	-0.112123	-0.45734
CXCL8	0.214031	0.132826	-0.249273	-0.0975838	#VALUE!	#VALUE!	#VALUE!	#VALUE!	-1.61036	-0.999878	1.26419	1.34604	#VALUE!	#VALUE!	#VALUE!	#VALUE!	0.315024	0.545606	0.353217	-0.245649	1.33072	1.38177	1.30849	1.55853	0.573369	1.33523	-1.23063	-1.43335	0.930991	1.14392	-1.21854	-1.1842	-1.01983	-1.19752	1.31632	1.44925	-1.30049	-1.6413	0.224874	1.01633	1.22795	1.19446	-1.36353	-1.39001	0.64606	0.72507	0.247024	0.773759	-2.05868
CXCL5	0.103823	0.218674	-0.194942	-0.127555	#VALUE!	#VALUE!	#VALUE!	#VALUE!	0.076766	0.1466	-0.10024	-0.123126	#VALUE!	#VALUE!	#VALUE!	#VALUE!	0.245231	0.0704206	0.0320924	-0.010596	0.181873	-0.0506446	0.496744	0.363883	0.210012	-0.332886	-0.522101	-0.608872	-0.241421	-0.145016	-0.79951	-0.611382	0.0813001	-0.00477473	-0.32821	-0.263407	-0.00386063	-0.071602	-0.922403	-0.938782	0.21598	0.148945	-0.707752	-0.696722	-0.971228	-0.90048	-0.0925886	-0.197905	-0.606476
CXCL12	0.0991168	0.0301108	-0.150643	0.0214152	-0.944319	#VALUE!	#VALUE!	#VALUE!	1.5057	#VALUE!	-1.22881	-0.276882	#VALUE!	#VALUE!	#VALUE!	#VALUE!	0.71925	0.560789	0.0574764	0.352757	-0.0991341	0.0449298	0.639845	0.640168	-0.118686	-0.183878	-0.473133	-0.581613	0.161501	0.208807	-1.73459	-1.69921	-1.43292	-1.42426	0.0366634	0.0251067	0.258818	0.617923	-1.91363	-1.9127	0.526854	0.489543	-0.449947	-0.54539	-0.763063	-0.737317	-0.212386	-0.0262672	-2.18627
MMP7	-0.205359	-0.316628	0.181816	0.34017	-6.76466	#VALUE!	#VALUE!	#VALUE!	-0.0552049	-0.0783143	0.0389953	0.0945239	#VALUE!	3.78325	#VALUE!	#VALUE!	0.733325	0.888308	0.199088	-0.00225369	0.456252	0.600655	-0.444434	-0.031562	0.347098	0.344357	0.0648373	0.187756	0.496283	0.12976	0.340245	-0.0351135	0.483796	0.267871	0.167666	0.259988	0.661605	-0.0476481	0.312362	-0.269328	1.02359	0.907438	0.276582	-0.162335	0.122838	-0.465073	0.0898813	-0.00830714	0.230687
TIMP2	0.126707	0.141603	-0.162792	-0.105518	#VALUE!	#VALUE!	#VALUE!	#DIV/0!	0.0718093	-0.0125318	-0.00513887	-0.0541387	#VALUE!	#VALUE!	#VALUE!	#VALUE!	0.712485	0.646872	0.539336	0.433263	0.713357	0.684724	0.924825	0.81811	0.167332	0.112157	-0.0349323	0.0360936	0.0950096	0.143418	-0.207853	0.0849331	0.579615	0.592482	0.0464943	0.0759171	0.579322	0.524122	-0.135657	-0.086209	0.513126	0.5242	-0.0796858	-0.0880839	-0.328381	-0.369729	0.304242	0.300483	-0.0923716
ACTA2	0.162349	0.0554061	-0.188263	-0.0294919	1.19969	3.31009	#VALUE!	#VALUE!	-0.415328	0.797681	0.0750175	-0.457371	#VALUE!	#VALUE!	#VALUE!	#VALUE!	0.20563	0.110525	0.184214	0.184527	-0.03116	-0.0703236	0.314013	0.334854	-0.424266	-0.501117	-0.452566	-0.733898	-0.38052	-0.266313	-0.763141	-0.748211	-0.174488	-0.20545	-0.510214	-0.480411	0.0621289	0.00285991	-0.464778	-0.486264	0.159629	0.193452	-1.01422	-1.01914	-0.75846	-0.775497	0.548137	0.563056	-0.94667
DNASE1	-0.225307	-0.0191431	0.0980444	0.146405	#VALUE!	#VALUE!	#VALUE!	#VALUE!	0.0308027	0.207719	-0.256755	0.0182333	#VALUE!	#VALUE!	#VALUE!	#VALUE!	0.225857	0.195278	0.248258	0.288124	0.175182	0.178428	0.657661	0.476358	-0.114519	0.00559409	-0.278952	-0.0797865	0.0690382	0.220436	-0.362265	-0.303284	0.0331648	0.0594099	0.117195	0.161159	0.390768	0.231556	-0.139087	-0.227636	1.10559	0.90959	-0.28508	-0.396217	-0.570724	-0.406015	0.462799	0.372629	-0.314785
PRKDC	0.267725	0.194666	-0.230824	-0.231567	#VALUE!	#VALUE!	#VALUE!	#VALUE!	-0.0204048	-0.0159416	-0.037466	0.0738125	-4.49773	#VALUE!	#VALUE!	#VALUE!	0.662602	0.786521	0.772073	0.273635	0.496304	0.387997	1.09486	0.961274	0.225453	0.190854	-0.164081	-0.123777	-0.0123665	0.177806	-0.270198	-0.204967	0.438233	0.456212	0.0585316	0.114381	0.252446	0.392402	0.294126	-0.255953	0.72836	0.828998	-0.335652	-0.401864	-0.623864	-0.517968	0.30722	0.27645	-0.181893
CXCL3	0.0466175	0.124874	-0.0954113	-0.0760803	#VALUE!	#VALUE!	#VALUE!	#VALUE!	0.357669	0.0399218	-0.166892	-0.230699	#VALUE!	#VALUE!	#VALUE!	#VALUE!	0.285123	0.479382	0.3937	0.176415	0.382581	0.300584	0.43538	0.883542	0.157155	0.148188	-0.136972	-0.258496	0.0814503	0.284039	0.0778874	0.113803	0.366853	0.0829609	0.0149582	-0.0388595	0.810256	0.727161	-0.139353	-0.524649	0.668222	0.490377	-0.18171	-0.0237624	-0.680493	-0.423011	0.534913	0.833234	-0.0896002
TGFB1	0.257432	-0.301579	0.0124025	0.031745	#VALUE!	#VALUE!	#VALUE!	#VALUE!	-0.00243235	0.0621142	-0.00433207	-0.0553498	#VALUE!	#VALUE!	#VALUE!	#VALUE!	-0.10095	-0.106964	0.32291	0.337114	0.136675	0.151569	0.782192	0.620787	0.0308932	0.0280989	-0.0617887	-0.134895	-0.187451	-0.205277	-0.0806734	-0.101515	0.271971	-0.0812589	-0.0785543	-0.118828	0.0891822	0.057957	-0.497415	-0.338588	0.239048	0.11546	-0.3833	-0.376169	-0.416727	-0.469366	-0.204302	-0.248363	-0.256754
PTGES3	0.56295	1.39803	-1.79064	-0.170338	1.40935	1.5305	#VALUE!	#VALUE!	-0.216245	0.0350804	0.0592446	0.12192	0.778088	2.11861	#VALUE!	#VALUE!	0.486623	0.530307	0.408976	-0.0668518	-0.506236	-0.470012	0.197356	0.239543	-0.127814	-0.0655319	-0.0598652	0.0838574	-0.17666	-0.221639	0.0413559	0.0213574	0.233662	0.233933	0.169759	0.128321	0.356931	0.358999	-0.13297	-0.146424	-0.100444	-0.123814	-0.0489489	-0.0605628	-0.700986	-0.651665	-0.19566	-0.164908	-0.368264
PTGS2	0.0978885	0.0386119	-0.0878739	-0.0486264	#VALUE!	#VALUE!	#VALUE!	#VALUE!	0.042469	-0.0215874	0.0330734	-0.0539551	#VALUE!	#VALUE!	#VALUE!	#VALUE!	0.948281	0.707995	0.44075	0.340666	0.42314	0.501757	0.865219	0.748085	0.177809	0.121806	0.121275	0.09458	0.4567	0.444912	0.156971	0.240227	1.94318	0.87592	0.0758499	0.0430225	0.103394	0.133139	-0.0205185	-0.0342781	0.577065	0.724509	-0.0653679	0.00641139	-0.517108	-0.516223	-0.207549	-0.278745	0.0413292
HPGDS	-1.76076	-2.01558	1.30269	2.47365	-11.175	#VALUE!	#VALUE!	#VALUE!	#VALUE!	#VALUE!	#VALUE!	#VALUE!	#VALUE!	#VALUE!	#VALUE!	#VALUE!	1.82498	0.734164	0.225238	-1.31276	0.304305	-0.0385677	-2.31623	-1.65822	#VALUE!	1.35061	1.58466	#VALUE!	-1.36623	-0.125852	#VALUE!	#VALUE!	1.53422	1.73983	-0.296121	#VALUE!	#VALUE!	1.39036	1.11694	#VALUE!	#VALUE!	1.93108	#VALUE!	#VALUE!	#VALUE!	0.958976	-0.443864	0.120544	-0.46832
PTGS1	0.0971012	-0.113676	0.00938034	0.00719452	#VALUE!	#VALUE!	#VALUE!	#VALUE!	-0.0407524	0.0266132	0.0145588	-0.000419617	#VALUE!	-1.19043	#VALUE!	#VALUE!	0.264483	0.538205	0.362294	0.254515	0.403714	0.438201	0.952336	0.708897	-0.0257045	0.123944	-0.260776	-0.202478	0.362803	0.380158	-0.0583126	0.243363	0.420272	0.60477	0.292529	0.209277	0.137723	-0.00457446	-0.480191	-0.502009	0.628784	0.708873	-0.508042	-0.334307	-0.662203	-0.615983	0.119174	0.314372	-0.27554
IL4	-0.654904	-0.310584	0.355624	0.609864	#VALUE!	#VALUE!	#VALUE!	#VALUE!	-0.206244	0.0235033	-0.0484896	0.231231	#VALUE!	#VALUE!	#VALUE!	#VALUE!	1.19322	0.785812	2.20326	1.25309	0.582033	2.14857	0.847151	1.26944	1.24453	1.02542	0.553026	1.567	0.523592	0.906521	-0.390042	0.0582484	1.35587	1.59034	0.98632	0.460537	1.13722	0.580754	0.978793	1.33855	1.6409	1.25771	0.0776218	0.0270542	0.214083	0.622662	1.06215	0.638151	0.478279
CXCL9	-0.030283	-0.167479	0.0224514	0.17531	-2.00587	#VALUE!	#DIV/0!	#DIV/0!	#VALUE!	#VALUE!	#VALUE!	#VALUE!	#VALUE!	#VALUE!	#VALUE!	#DIV/0!	0.186602	0.321605	0.233823	0.39049	-0.917756	-1.13577	-0.595485	-0.524673	0.497233	0.613768	-0.283275	-0.3401	0.719018	0.699057	0.0523213	0.199759	0.459285	0.503278	0.738898	0.849116	-0.511933	-0.541487	-1.14679	-1.45685	1.49747	1.24378	0.482898	0.425882	0.0215276	0.304231	1.13185	0.867212	-1.14004
CX3CL1	-0.181365	-0.119939	0.215814	0.0854902	#VALUE!	#VALUE!	#VALUE!	#VALUE!	-0.0677123	0.248951	-0.0525069	-0.128732	#VALUE!	#VALUE!	#VALUE!	#VALUE!	0.754541	0.907167	0.323318	0.119814	0.757805	0.843344	0.375645	0.479523	-0.616627	-0.861313	0.182897	0.334684	-0.0319082	0.0786646	0.15201	0.520641	0.775717	0.856472	-0.023224	0.225664	0.664851	0.640227	0.0877803	-0.0836159	1.95587	1.81277	0.119843	0.197136	-1.15117	-1.59356	0.00344308	0.692704	0.293169
MMP9	-2.28197	-1.88656	1.57734	2.59119	#VALUE!	#VALUE!	#VALUE!	#VALUE!	1.12511	-0.244356	-0.487806	-0.39295	-10.7199	#VALUE!	#VALUE!	#VALUE!	1.9649	0.498378	1.63836	1.0609	1.82964	2.00788	-0.573142	-0.494966	1.71978	1.87546	0.752557	0.748603	0.655209	1.96307	2.35658	1.52043	2.35825	1.30757	-0.280593	0.536128	0.950782	1.50256	2.73828	1.75814	1.08535	2.62951	2.34274	-0.0466067	0.990836	1.97431	1.60839	1.58709	-0.294923
KISS1	-2.05663	-1.71933	3.77596	#VALUE!	#VALUE!	#VALUE!	#VALUE!	#VALUE!	#VALUE!	#VALUE!	#VALUE!	#VALUE!	#VALUE!	#VALUE!	#VALUE!	#VALUE!	7.06197	1.06036	1.71481	1.92092	-0.00435177	1.03236	-0.455329	0.440659	0.272939	0.71243	#VALUE!	#VALUE!	0.135518	1.89062	2.405	3.57691	-0.661815	-0.716911	2.12011	#VALUE!	#VALUE!	0.249235	#VALUE!	0.433061	5.85979	#VALUE!	2.3552	#VALUE!	0.346776	#VALUE!	#VALUE!	3.55011	0.447015
PRDX6	0.203535	0.277727	-0.262778	-0.218483	-0.0336399	#VALUE!	#VALUE!	#DIV/0!	-0.0494308	0.0332108	-0.00906563	0.0252857	#VALUE!	#VALUE!	#VALUE!	#VALUE!	0.246113	0.215884	-0.166353	-0.214594	0.196839	0.153056	0.530236	0.481306	-0.196394	-0.231748	-0.376625	-0.392488	0.0865959	0.188137	-0.2089	-0.172722	0.325461	0.334414	0.110203	0.150626	0.0555218	0.188624	-0.476012	-0.486501	0.463782	0.405495	-0.394334	-0.389135	-0.682807	-0.611669	0.233987	0.135602	-0.0968506
BOLA-N	0.2583	0.160671	-0.262627	-0.156344	#VALUE!	#VALUE!	#VALUE!	#VALUE!	0.0684571	-0.0425982	-0.0319343	0.00607538	#VALUE!	#VALUE!	#VALUE!	#VALUE!	-0.0524766	0.177525	0.128064	0.0434287	-0.262663	-0.350389	0.297818	0.110007	-0.402353	-0.671142	-0.796247	-0.823484	-0.358814	-0.362192	-0.470106	-0.410843	-0.215067	-0.187792	-0.508379	-0.605404	-0.0849868	-0.629052	-0.406528	-1.03944	0.181977	0.0597752	-0.636943	-0.53099	-0.804544	-0.696593	-0.258712	-0.19675	-0.861751
PLA2G2A	-2.2877	-2.25214	1.85777	2.68207	-10.3794	-8.57103	#VALUE!	#VALUE!	#VALUE!	#VALUE!	0.123276	-0.123276	#VALUE!	#VALUE!	#VALUE!	#VALUE!	2.45578	1.79237	-1.91414	-0.590377	0.343762	-0.352939	-0.207035	-0.235523	2.30675	0.418888	0.723214	1.64976	-0.316719	-0.435058	1.69274	1.23836	-0.33184	0.152573	2.21678	1.01956	-1.42556	-0.563163	0.350655	0.276135	#VALUE!	#VALUE!	0.286454	1.50686	0.175893	0.685609	0.376302	#VALUE!	-0.0958816
DNMT1	0.185583	0.103134	-0.168602	-0.120114	#VALUE!	#VALUE!	#VALUE!	#VALUE!	-0.0146632	0.084208	0.0133462	-0.082891	#VALUE!	#VALUE!	#VALUE!	#VALUE!	0.424322	0.411625	0.371569	0.38131	0.590374	0.514349	0.820292	0.844094	0.251395	0.228484	0.0251182	0.000145276	0.31539	0.241322	-0.0931832	-0.0676762	0.598334	0.621079	0.0996803	0.0425361	0.437302	0.455058	-0.23182	-0.133283	0.691441	0.759845	-0.227761	-0.322953	-0.22754	-0.277492	0.165702	0.151585	-0.0908291
TGFB2	0.255132	0.219815	-0.228705	-0.246242	#VALUE!	#VALUE!	#VALUE!	#VALUE!	0.049161	0.0310755	-0.0462866	-0.0339499	#VALUE!	#VALUE!	#VALUE!	#VALUE!	0.494442	0.463541	-0.101782	-0.0277044	0.519117	0.520952	0.738455	0.728714	-0.128754	-0.114372	-0.0916864	0.0117358	0.175472	0.135914	0.0275706	-0.0265676	0.269094	0.307136	0.0714701	0.0849875	0.293389	0.278183	-0.187233	-0.20825	0.613304	0.549467	-0.427377	-0.333118	-0.623912	-0.575662	0.220715	0.168652	-0.266939
CCL2	-0.347307	-0.77699	0.685769	0.438529	#VALUE!	#VALUE!	#VALUE!	#VALUE!	-1.20169	#VALUE!	1.20169	#VALUE!	#VALUE!	-11.7194	#VALUE!	#VALUE!	1.04156	1.65142	1.50774	0.931886	-0.929398	-1.16298	0.704772	0.484897	1.13834	0.808704	1.36956	0.819106	0.413047	0.520255	1.3905	1.2855	0.609048	0.687574	1.3974	1.78347	-0.574721	-0.814243	1.05711	1.34015	1.28956	1.82955	0.822002	0.541481	1.1869	0.109291	1.55783	0.873554	-1.37676
HPGD	-0.982227	-1.26455	1.03901	1.20777	#VALUE!	#VALUE!	#VALUE!	#VALUE!	#VALUE!	#VALUE!	-0.567616	0.567616	-10.0981	#VALUE!	#VALUE!	#VALUE!	-0.211028	-0.509532	1.17727	1.60675	0.102021	0.2202	-1.02084	-0.845851	-0.1781	-0.259772	-0.202262	-1.05564	-1.08544	-2.05574	0.0547531	-0.539058	-0.0485107	0.965829	-0.0575515	0.271737	0.297967	0.0513433	-2.26409	-1.66515	-0.514628	0.731492	1.43611	-3.75556	-0.190741	-1.207	-0.870349	0.0862783	-1.89932
DAGLA	-0.256892	-0.178235	0.117822	0.317304	#VALUE!	#VALUE!	#VALUE!	#VALUE!	0.264585	0.113081	-0.385994	0.00832891	#VALUE!	#VALUE!	#VALUE!	#VALUE!	0.941254	0.696999	0.467007	0.389759	0.345616	0.530453	0.54681	0.311745	0.299738	0.365528	0.208668	0.314904	0.39007	0.376002	0.132414	0.0650123	0.233233	0.417242	0.193156	0.342593	0.589482	0.636964	-0.0608513	-0.176538	0.720046	0.973641	-0.336986	-0.17784	-0.379863	-0.421376	0.161925	0.221787	-0.0735752
IL1B	-2.71204	-2.45975	2.5759	2.59589	#VALUE!	#VALUE!	#VALUE!	#VALUE!	#VALUE!	#VALUE!	#VALUE!	#VALUE!	#VALUE!	#VALUE!	#VALUE!	#VALUE!	0.488294	-0.238588	0.973196	0.678694	1.69238	1.73668	-0.864403	0.283247	1.31076	0.683325	2.87243	1.33105	0.195047	1.10017	#VALUE!	#VALUE!	#VALUE!	0.269239	2.90131	#VALUE!	1.09768	#VALUE!	#VALUE!	#VALUE!	1.87947	0.593478	1.07376	-0.16292	0.545195	-1.0549	1.36034	#VALUE!	0.377695
IL6	-1.01679	-0.900895	1.29078	0.626897	#VALUE!	#VALUE!	#VALUE!	#VALUE!	-0.184035	-0.0614381	0.139135	0.106338	#VALUE!	#VALUE!	#VALUE!	#VALUE!	1.54988	1.16683	1.15942	1.46552	1.02057	3.49725	0.911843	0.667404	1.07441	1.84462	1.52422	2.78315	1.77851	2.19298	1.07269	1.0993	1.56199	1.50904	0.808674	0.527094	0.771314	1.57822	1.12847	1.31716	1.09068	2.0258	1.19642	0.189389	-0.0256626	0.668689	2.10836	0.757781	1.20843
CXCL10	0.0249729	-0.118883	0.0247116	0.0691986	#VALUE!	#VALUE!	#VALUE!	#VALUE!	#VALUE!	#VALUE!	#VALUE!	#VALUE!	#VALUE!	#VALUE!	#VALUE!	#VALUE!	0.77629	0.750705	-0.219169	0.145238	0.647353	0.776938	0.278529	0.257035	-0.0587112	-0.189269	-0.779695	-0.907436	0.632523	0.484719	0.195891	0.543193	0.522025	0.33134	0.338445	0.510941	0.37092	0.412088	0.250505	0.0065492	0.321466	0.264108	0.025432	0.170595	-1.09798	-0.625144	0.700462	0.788535	0.00988324
CXCR3	-1.26999	-1.16383	1.47425	0.959567	#VALUE!	#VALUE!	#VALUE!	#VALUE!	-1.33515	0.630518	0.119116	0.585516	#VALUE!	#VALUE!	#VALUE!	#VALUE!	2.54944	2.52171	0.075147	2.38295	1.94302	1.80785	0.543033	0.829482	0.0405572	0.0978635	-0.380198	-0.153899	1.75029	3.55467	0.880153	1.78454	-0.0703303	0.402847	2.40383	1.24528	0.647888	-0.387461	1.61863	1.25838	-0.760491	1.50451	0.317293	0.300918	-0.317923	0.0453528	3.30994	2.32841	1.75135
MMP12	-1.12541	-0.984671	0.681446	1.42863	-4.73831	-4.2917	#VALUE!	#VALUE!	0.0179214	0.00580215	-0.153826	0.130102	-7.23438	-6.91095	#VALUE!	#VALUE!	0.692292	0.608815	1.37488	0.874441	0.0518688	-0.00869528	-0.972835	-1.06672	0.149134	0.433884	-0.308736	-0.0973508	-0.247057	-0.101652	-0.0897233	-0.0755612	-0.239786	-0.126081	0.0479816	0.137642	0.477267	0.774558	0.593655	0.836099	1.34212	1.15487	0.173377	0.139806	0.270703	-0.348724	1.21066	1.09151	-0.0700981
GNRHR	-2.40141	-2.59652	4.99793	#VALUE!	-10.8472	#VALUE!	#VALUE!	#VALUE!	#VALUE!	#VALUE!	#VALUE!	#VALUE!	#VALUE!	#VALUE!	#VALUE!	#VALUE!	0.100425	1.0836	-0.124337	0.853347	1.60537	#VALUE!	-1.99575	-1.7946	1.79133	0.336715	#VALUE!	2.74219	0.603942	1.18054	#VALUE!	2.59796	1.58483	-0.140807	2.70909	2.47908	1.08366	0.482871	1.95183	#VALUE!	2.804	1.9634	1.53163	1.73972	1.09446	1.24394	2.46522	2.85731	1.9649
IL17A	-1.98871	-1.39549	2.20529	1.17891	#VALUE!	-11.1293	#VALUE!	#VALUE!	#VALUE!	-0.140167	0.140167	#VALUE!	#VALUE!	-12.8363	#VALUE!	#VALUE!	2.0735	2.6721	-1.05558	-0.146073	-0.988402	1.76605	-0.515725	-0.962958	1.39021	0.523128	1.63539	0.573665	0.3297	-0.161744	1.94036	#VALUE!	#VALUE!	0.311801	#VALUE!	1.80184	1.31502	0.331398	#VALUE!	0.139099	#VALUE!	#VALUE!	1.5649	#VALUE!	1.51545	#VALUE!	0.666282	#VALUE!	0.0247458
KCTD11	0.11414	0.165806	-0.219528	-0.0604172	#VALUE!	#VALUE!	#VALUE!	#VALUE!	0.0663967	0.195974	-0.230639	-0.0317326	#VALUE!	#VALUE!	#VALUE!	#VALUE!	0.290555	0.284617	-0.0331146	-0.112226	0.495257	0.603787	0.791457	0.73906	-0.0306312	0.00345119	0.0548905	0.0150345	-0.0632755	0.188824	0.07701	0.0860165	0.588986	0.636468	0.402131	0.533261	0.529676	0.510087	-0.419465	-0.33018	1.17682	1.18058	-0.389125	-0.378785	-0.227675	-0.122956	0.403598	0.425691	0.142337
OSTF1	0.277375	0.263423	-0.259221	-0.281577	#VALUE!	#VALUE!	#DIV/0!	#VALUE!	0.100768	0.117774	-0.156871	-0.0616713	#VALUE!	0.0439954	#VALUE!	#VALUE!	0.424797	0.412422	-0.0939485	-0.107834	0.343777	0.341574	0.332092	0.329073	0.0582484	-0.0307008	-0.137219	-0.0448133	0.179802	0.215011	0.0164316	-0.0121042	0.0799311	0.079624	0.0860747	0.000718911	0.318016	0.220955	-0.442367	-0.375862	0.0635532	-0.00134627	-0.437212	-0.417236	-0.399862	-0.487297	0.159293	0.171055	-0.239809
DNMT3A	-0.603315	-1.05955	0.735074	0.927796	-4.5361	#VALUE!	#VALUE!	#DIV/0!	-0.953899	-0.594233	0.496687	1.05145	-5.35247	#VALUE!	#VALUE!	#VALUE!	1.32433	0.437192	0.308175	1.09875	0.378724	0.928659	0.393089	0.161907	0.14923	0.404275	0.427306	-0.211764	0.374883	0.501214	0.0736097	0.710958	0.270803	0.735006	1.36256	1.42749	-1.20509	-0.221937	0.718664	1.15372	1.19093	1.98255	0.478433	0.145082	-0.187998	-0.158726	0.713446	1.98136	1.02544
RAB27A	0.0175586	-0.00572443	-0.0943971	0.0825629	#VALUE!	#VALUE!	#VALUE!	#VALUE!	0.120744	0.270986	-0.291596	-0.100134	#VALUE!	#VALUE!	#VALUE!	#VALUE!	0.267758	0.218106	0.298386	0.419733	0.510439	0.364312	0.679304	0.526543	-0.323381	-0.417272	-0.367534	-0.192463	0.0461868	0.00513109	-0.204893	-0.369737	0.403061	0.330975	-0.174104	-0.276563	0.304356	0.101401	-0.727245	-0.345897	0.451672	0.356805	-0.367757	-0.377896	-0.708924	-0.766668	0.145846	0.228665	-0.588241
CCL3	-2.14544	-1.65303	3.79847	#VALUE!	#VALUE!	#VALUE!	#VALUE!	#DIV/0!	-2.07701	#VALUE!	2.07701	#VALUE!	#VALUE!	#VALUE!	#VALUE!	#VALUE!	0.909353	3.07097	0.427934	0.385831	3.30475	2.93438	-0.317067	-0.617468	2.68622	1.42275	2.01502	5.8428	1.33548	1.53136	#VALUE!	3.48865	7.30452	3.5568	#VALUE!	3.44213	1.336	3.08043	4.04391	#VALUE!	3.94076	3.20806	#VALUE!	3.21897	#VALUE!	#VALUE!	2.92262	2.18079	1.34225
GAPDH	0.35541	0.377985	-0.358852	-0.374542	0.515021	1.25377	#VALUE!	#VALUE!	-0.153407	0.539239	-0.135003	-0.25083	1.82811	3.14343	#VALUE!	#VALUE!	0.431876	0.360297	-0.265561	-0.183833	-0.727588	-0.720107	0.396462	0.420308	-0.165668	-0.148048	-0.329427	-0.321698	-0.0232441	-0.0307857	-0.183662	-0.174276	-0.0436412	-0.0497619	-0.278722	-0.223132	0.0481752	0.0100263	-0.602517	-0.579228	-0.190922	-0.194264	-0.558003	-0.594706	-0.589921	-0.616648	-0.136202	-0.118251	-0.50335
ACTB	0.15811	0.143837	-0.126953	-0.174995	4.4429	4.51801	#VALUE!	#VALUE!	-0.0122461	-0.000498772	0.0185156	-0.00577068	2.89108	2.51431	#VALUE!	#VALUE!	0.354148	0.333394	0.162229	0.0719789	0.235414	0.238023	0.50323	0.507232	-0.194199	-0.21132	-0.299252	-0.295813	0.0235113	0.0275892	-0.249642	-0.2389	0.4995	0.477767	0.0635541	0.0616048	0.427519	0.741217	-0.22119	-0.319243	-0.343289	-0.339386	-0.365931	-0.372135	-0.687458	-0.628121	0.243135	0.192257	-0.0821878
TBP	0.0894079	0.0461111	-0.207961	0.0724421	#VALUE!	#VALUE!	#VALUE!	#VALUE!	-0.117801	0.0244398	-0.0530882	0.146449	#VALUE!	#VALUE!	#VALUE!	#VALUE!	0.339821	0.100742	0.0205	-0.0417406	0.3983	0.374279	0.38845	0.267912	-0.0331728	-0.100645	-0.673771	-0.463045	0.0659407	0.160627	-0.599468	-0.469584	0.0895651	0.274782	-0.0280782	0.118748	-0.0607583	-0.299316	-0.503771	-0.49513	0.551197	0.272105	-0.389326	-0.418855	-0.444877	-0.558067	0.0273441	-0.00199095	-0.324577
GDC	-2.26944	-2.19062	4.46007	#VALUE!	#VALUE!	#VALUE!	#VALUE!	#VALUE!	#VALUE!	#VALUE!	-0.0437469	0.0437469	#VALUE!	#VALUE!	#VALUE!	#VALUE!	#VALUE!	-0.11563	1.0563	-0.638342	-0.409495	#VALUE!	-3.39433	-2.96329	-0.236643	1.12368	-0.0797868	-0.192423	-2.19529	-0.175364	#VALUE!	#VALUE!	0.425066	1.56033	1.09137	-0.0852647	1.31677	#VALUE!	#VALUE!	#VALUE!	#VALUE!	-0.494623	-1.06618	-0.549517	-1.37567	-0.380812	#VALUE!	0.95756	#VALUE!
RTC	-0.0057826	0.0729318	-0.100566	0.0334172	#VALUE!	#VALUE!	#VALUE!	#VALUE!	0.0893283	0.217821	-0.132052	-0.175097	#VALUE!	#VALUE!	#VALUE!	#VALUE!	-0.190098	-0.207099	-0.537085	-0.515233	-0.00224177	-0.0300509	-0.399783	-0.379729	-0.436024	-0.463084	-0.456916	-0.404748	-0.156132	-0.127251	-0.224778	-0.287244	-0.448928	-0.340058	-0.367732	-0.37621	-0.364958	-0.387129	-0.608551	-0.684422	-0.211182	-0.176617	-0.556935	-0.584604	-0.837158	-0.793236	-0.774586	-0.842222	-0.378361
HPRT1	0.323224	0.320844	-0.355809	-0.288259	0.985275	#VALUE!	#VALUE!	#VALUE!	-0.0874457	-0.0908694	0.0444798	0.133835	#VALUE!	0.125801	#VALUE!	#VALUE!	0.488878	0.473228	-0.185648	-0.238022	0.406423	0.388254	0.609043	0.596653	-0.00123803	-0.0566045	-0.11369	-0.0523054	0.095312	0.186327	-0.18923	-0.226423	0.279068	0.342602	-0.0181181	-0.0270616	0.00422319	0.161087	-0.284311	-0.304153	0.269574	0.26821	-0.185619	-0.165266	-0.384288	-0.365081	-0.139154	-0.130871	-0.177513
PPC	-0.268038	-0.128739	-0.177718	0.574495	-13.5978	-13.7315	#DIV/0!	#DIV/0!	-0.118644	0.338428	-0.180785	-0.0389986	-12.2586	-12.5328	#DIV/0!	#DIV/0!	-1.75342	-1.58592	-0.0986935	-0.297817	-1.56061	-1.45651	-1.52867	-1.3065	-1.36192	-1.14062	-1.82539	-1.42441	-1.93022	-1.72008	-1.4917	-1.38896	-1.39944	-1.45258	-1.70769	-1.67231	-1.49898	-1.55647	-1.75279	-1.72104	-1.88276	-1.97144	-1.57461	-1.59432	-2.1998	-1.63448	-1.19289	-1.13206	-1.9849
2^-delta delta Ct
	Control																bCSC High Fert																				bCSC Low Fert
	No EXO bCSC 1		No EXO bCSC 2		RTC bCSC		TC bCSC		No EXO bEEL 1		No EXO bEEL 2		RTC bEEL		TC bEEL		1B		2B		3B		4B		5B		6B		7B		8B		9B		10B		28B		29B		30B		31B		32B		33B		34B
PLCB2	#VALUE!	#VALUE!	#VALUE!	#VALUE!	#VALUE!	#VALUE!	#VALUE!	#VALUE!	#VALUE!	#VALUE!	#VALUE!	#VALUE!	#VALUE!	#VALUE!	#VALUE!	#VALUE!	#VALUE!	#VALUE!	#VALUE!	#VALUE!	#VALUE!	#VALUE!	#VALUE!	#VALUE!	#VALUE!	#VALUE!	#VALUE!	#VALUE!	#VALUE!	#VALUE!	#VALUE!	#VALUE!	#VALUE!	#VALUE!	#VALUE!	#VALUE!	#VALUE!	#VALUE!	#VALUE!	#VALUE!	#VALUE!	#VALUE!	#VALUE!	#VALUE!	#VALUE!	#VALUE!	#VALUE!	#VALUE!	#VALUE!
PTGES	0.947344	0.87007	1.0844	1.11879	#VALUE!	#VALUE!	#VALUE!	#VALUE!	1.74149	0.29863	1.27346	1.50994	#VALUE!	#VALUE!	#VALUE!	#VALUE!	0.777993	0.818889	0.951306	1.11138	0.821147	0.860946	0.589394	0.676439	1.09801	1.19094	1.25881	1.29472	1.00069	0.922568	0.916947	0.948603	0.699389	0.79613	1.09914	1.02057	0.678454	0.837354	1.19602	1.20772	0.667219	0.756857	1.01322	1.07391	1.46312	1.32616	0.899022	1.09923	1.28918
MGLL	1.7501	1.56418	0.756266	0.483033	#VALUE!	398.397	#VALUE!	#VALUE!	2.25789	#VALUE!	0.673031	0.658055	#VALUE!	#VALUE!	#VALUE!	#VALUE!	0.208219	0.254551	0.857105	0.824878	0.43022	0.283522	0.859108	0.724847	0.508661	0.652802	0.587055	0.183803	0.223114	0.327093	0.921929	1.10967	0.117929	0.209951	0.165734	0.518386	0.560718	0.180948	0.164304	0.260986	#VALUE!	0.203903	0.600716	0.201891	0.245653	1.08049	0.230939	0.13693	0.2472
IL1A	1.17224	1.14289	0.782195	0.954251	#VALUE!	#VALUE!	#VALUE!	#VALUE!	0.540335	14.7214	0.385867	0.3258	#VALUE!	#VALUE!	#VALUE!	#VALUE!	0.575299	0.497037	0.485685	0.443956	0.448099	0.685675	0.523912	0.496413	0.632626	0.661715	0.865765	0.726038	0.5381	0.589755	0.680035	0.822297	0.859954	0.721521	0.906034	0.620212	0.567101	0.652528	0.805841	0.838269	0.565066	0.631388	0.991736	1.32204	1.02838	1.24475	0.531297	0.632881	0.750115
IL10	4.11471	3.82277	0.154926	0.410354	#VALUE!	#VALUE!	#VALUE!	#VALUE!	0.613267	#VALUE!	#VALUE!	1.63061	#VALUE!	#VALUE!	#VALUE!	#VALUE!	0.292953	0.136897	0.548729	0.509283	0.130202	0.502709	4.88069	3.65952	0.752475	1.12525	0.412648	0.684335	0.119216	0.199933	0.258143	0.382558	0.181508	0.364643	1.51011	1.06155	0.380017	#VALUE!	0.277844	0.174368	#VALUE!	0.488054	0.229861	#VALUE!	0.280456	1.46864	0.437644	0.179095	0.242428
CXCL11	1.16495	0.858405	#VALUE!	#VALUE!	#VALUE!	#VALUE!	#VALUE!	#VALUE!	#VALUE!	2.49523	0.400765	#VALUE!	#VALUE!	#VALUE!	#VALUE!	#VALUE!	0.1356	0.23804	0.27337	0.23635	#VALUE!	0.0746603	0.396876	0.304998	0.0620186	0.0867763	0.253096	0.14412	0.118281	0.118114	0.13877	#VALUE!	0.343831	0.176635	0.0732485	#VALUE!	0.0569545	0.00497844	0.10684	0.102783	#VALUE!	0.0829302	#VALUE!	0.054046	0.107113	0.354827	0.0722409	0.0702044	0.517197
IFNG	1.09177	0.915947	#VALUE!	#VALUE!	#VALUE!	#VALUE!	#VALUE!	#VALUE!	#VALUE!	1	#VALUE!	#VALUE!	#VALUE!	#VALUE!	#VALUE!	#VALUE!	0.0616778	0.0523428	0.0838965	0.0784065	0.183939	0.124395	0.484559	0.417151	0.459916	#VALUE!	0.0694336	0.300868	0.114654	0.330394	#VALUE!	#VALUE!	0.333933	0.0814535	0.338813	0.215132	0.0745606	0.0343308	0.168665	#VALUE!	0.0947617	#VALUE!	#VALUE!	#VALUE!	0.105021	0.221424	#VALUE!	#VALUE!	0.11344
TIMP1	0.870829	0.861571	1.13989	1.16927	0.447233	0.279056	#VALUE!	#VALUE!	0.940982	#VALUE!	1.04098	1.02088	0.0910279	0.0410793	#VALUE!	#VALUE!	0.804615	0.827868	1.05788	1.07127	0.981026	1.00418	0.808744	0.783292	1.25145	1.24083	1.21878	1.23279	1.06136	0.970351	1.19621	1.21115	0.804308	0.805331	1.04531	1.06871	0.892905	0.902741	1.55679	1.57082	0.729188	0.691311	1.26995	1.20919	1.70793	1.65295	1.09212	1.12733	1.17708
DES	0.891593	0.890049	1.09253	1.15341	0.382446	0.739196	#VALUE!	#VALUE!	1.20319	#VALUE!	#VALUE!	0.831125	1859.12	307.749	#DIV/0!	#VALUE!	0.566397	0.671125	0.744066	0.881371	0.713565	0.91821	0.514419	0.632713	0.237494	0.287958	0.31275	0.315935	0.249521	0.241585	0.740273	0.869388	1.02372	1.02451	0.952336	0.967712	0.887669	1.03046	1.08729	1.3605	3.01275	3.23078	1.05685	1.24985	0.382095	0.390422	0.218854	0.265748	2.16361
CL43	1.02492	0.975685	#VALUE!	#VALUE!	#VALUE!	#VALUE!	#VALUE!	#VALUE!	#VALUE!	#VALUE!	#VALUE!	#VALUE!	#VALUE!	#VALUE!	#VALUE!	#DIV/0!	#VALUE!	0.0418357	0.112957	0.384506	0.0861423	0.0908626	0.555177	0.640458	0.315237	0.15569	#VALUE!	#VALUE!	0.0979721	0.034367	#VALUE!	#VALUE!	0.0412064	0.0395234	#VALUE!	#VALUE!	#VALUE!	#VALUE!	0.124256	0.0359398	#VALUE!	0.0436236	#VALUE!	#VALUE!	0.0971744	#VALUE!	#VALUE!	#VALUE!	0.0290012
AHCY	0.860812	0.921323	1.09524	1.15126	#VALUE!	#VALUE!	#VALUE!	#VALUE!	0.826582	2.12299	0.745525	0.764372	#VALUE!	#VALUE!	#VALUE!	#VALUE!	0.836942	0.777792	1.12324	1.22486	0.705945	0.655956	0.589805	0.606323	0.935128	0.910223	0.847234	0.817268	0.83073	0.800123	1.12925	0.932834	0.709114	0.757237	0.808371	0.824125	0.905219	0.852044	1.20288	1.27192	0.520575	0.496336	1.13176	1.10158	1.05798	1.18334	0.829827	0.849619	1.01976
IL12A	1.27879	1.32921	0.910749	0.645962	#VALUE!	#VALUE!	#VALUE!	#VALUE!	0.0375278	32.455	0.567706	1.44625	557.632	9437.83	#DIV/0!	#VALUE!	0.317208	0.539254	0.607729	0.485657	0.374412	0.690624	1.04848	0.701427	0.693599	0.625218	0.422868	0.775504	1.97376	1.8788	0.849392	0.728199	0.449003	0.618672	0.816484	0.825751	2.18152	2.33156	3.13627	3.25968	2.17901	2.77347	4.91322	5.60138	1.0142	0.820064	1.37606	2.69027	0.788429
DNMT3B	0.956634	0.89906	1.11677	1.04112	#VALUE!	#VALUE!	#VALUE!	#VALUE!	0.525271	5.47723	0.571497	0.608194	#VALUE!	#VALUE!	#VALUE!	#DIV/0!	0.689852	0.721649	0.909324	0.967598	0.717956	0.670865	0.672544	0.782507	0.953322	0.962724	1.14454	1.28998	1.10557	1.07668	1.10877	1.17434	0.669536	0.619417	0.737351	0.84218	0.790526	0.760272	0.903009	1.01701	0.58501	0.534731	1.44086	1.31437	1.43934	1.32074	0.888738	0.914233	1.19844
TNF	6.6759	9.81319	0.189352	0.0806137	#VALUE!	#VALUE!	#VALUE!	#VALUE!	1.22311	0.955283	2.01761	0.424195	#VALUE!	#VALUE!	#VALUE!	#VALUE!	0.598071	0.703076	0.181681	0.14789	0.480701	0.519791	0.996856	1.02307	0.196328	0.140086	0.659507	0.454228	0.915202	0.888886	0.761334	1.26479	0.658408	0.447035	0.0986849	0.172178	0.26266	0.275805	3.36668	1.63725	0.773652	0.373635	0.769114	0.872836	0.140017	0.179498	0.200936	0.50089	1.22147
CCL4	1.04084	0.960762	#VALUE!	#VALUE!	#VALUE!	1152.39	#VALUE!	#VALUE!	#VALUE!	#VALUE!	#VALUE!	#VALUE!	#VALUE!	#VALUE!	#VALUE!	#VALUE!	0.0681002	0.158515	0.194792	0.167303	0.474905	0.337975	1.25557	1.89443	0.108337	0.290646	0.0882037	0.0595436	0.169069	0.145166	#VALUE!	#VALUE!	0.283244	0.0904379	#VALUE!	#VALUE!	0.2646	0.127043	#VALUE!	0.169685	#VALUE!	#VALUE!	0.118726	#VALUE!	0.170587	#VALUE!	#VALUE!	#VALUE!	0.0988286
FAAH	1.01772	0.954032	1.10849	0.929131	#VALUE!	#VALUE!	#VALUE!	#VALUE!	0.928295	0.996782	1.01225	1.06764	#VALUE!	#VALUE!	#VALUE!	#VALUE!	0.80714	0.913959	0.940569	0.872333	0.859935	0.722612	0.644327	0.640158	0.971743	0.99376	1.22108	1.23341	0.924711	1.00099	1.12623	1.27712	0.766778	0.768474	0.905167	0.788937	0.747482	0.842413	1.16641	0.943165	0.806449	0.759633	1.42326	1.42453	1.53495	1.62446	0.892696	0.976194	1.36428
PTGIS	1.19988	1.18619	0.955021	0.735687	#VALUE!	483.995	#VALUE!	#VALUE!	#VALUE!	#VALUE!	#VALUE!	1	#VALUE!	#VALUE!	#VALUE!	#VALUE!	0.209296	0.236407	0.831375	0.795706	1.18267	1.70015	1.34454	1.11914	0.485457	0.502088	2.66324	1.82774	0.658693	0.801498	0.981062	0.325725	0.580632	0.392504	1.50331	2.17974	0.0702284	0.192666	0.933097	1.02592	0.153558	0.246189	1.00717	0.459061	0.852813	0.509257	0.324927	0.857471	0.345118
PTGES2	0.857939	0.848939	1.22092	1.12455	#VALUE!	#VALUE!	#VALUE!	#VALUE!	0.950612	0.95681	1.0601	1.03711	#VALUE!	#VALUE!	#VALUE!	#VALUE!	0.846635	0.825736	1.03037	0.944539	0.980136	0.860308	0.733582	0.752244	1.13318	1.12222	1.21843	1.25301	1.09808	1.02276	1.23859	1.21748	0.99988	0.954181	1.09547	1.12741	0.988581	0.918926	1.45398	1.7633	0.701467	0.70867	1.46962	1.29396	1.47142	1.44194	1.07269	1.08082	1.37301
CXCL8	0.862125	0.912043	1.18861	1.06998	#VALUE!	#VALUE!	#VALUE!	#VALUE!	3.05328	1.99983	0.416332	0.39337	#VALUE!	#VALUE!	#VALUE!	#VALUE!	0.803837	0.685104	0.782837	1.18563	0.39757	0.383749	0.403742	0.339498	0.672046	0.396328	2.34669	2.70074	0.524498	0.452529	2.32712	2.27237	2.02769	2.29346	0.401558	0.366211	2.46313	3.11947	0.85567	0.494374	0.426923	0.436949	2.57313	2.6208	0.639023	0.604968	0.842633	0.584891	4.16604
CXCL5	0.930564	0.859355	1.14468	1.09244	#VALUE!	#VALUE!	#VALUE!	#VALUE!	0.948181	0.903377	1.07195	1.08909	#VALUE!	#VALUE!	#VALUE!	#VALUE!	0.843681	0.95236	0.978001	1.00737	0.881558	1.03573	0.708705	0.77707	0.86453	1.25953	1.43605	1.52507	1.18216	1.10574	1.74051	1.52772	0.945205	1.00332	1.25545	1.20031	1.00268	1.05088	1.89527	1.91691	0.860961	0.90191	1.63326	1.62082	1.96051	1.86669	1.06628	1.14703	1.52254
CXCL12	0.933604	0.979345	1.11006	0.985266	1.92428	#VALUE!	#VALUE!	#VALUE!	0.35216	#VALUE!	2.34374	1.21157	#VALUE!	#VALUE!	#VALUE!	#VALUE!	0.607413	0.677931	0.960944	0.783086	1.07113	0.969337	0.641782	0.641638	1.08575	1.13593	1.38812	1.49652	0.894094	0.865252	3.32784	3.24724	2.69993	2.68377	0.974907	0.982748	0.835772	0.651609	3.76757	3.76513	0.694066	0.712251	1.36599	1.45942	1.69709	1.66707	1.1586	1.01837	4.55126
MMP7	1.15297	1.24542	0.881593	0.789948	108.734	#VALUE!	#VALUE!	#VALUE!	1.03901	1.05578	0.973333	0.936581	#VALUE!	0.0726321	#VALUE!	#VALUE!	0.601516	0.540247	0.871101	1.00156	0.728877	0.659454	1.36078	1.02212	0.786164	0.787659	0.956053	0.87797	0.708931	0.913984	0.789907	1.02464	0.715094	0.830544	0.890282	0.835095	0.632175	1.03358	0.805322	1.20525	0.491892	0.533131	0.825545	1.1191	0.918379	1.38039	0.9396	1.00577	0.852229
TIMP2	0.91592	0.906511	1.11945	1.07588	#VALUE!	#VALUE!	#VALUE!	#DIV/0!	0.951444	1.00872	1.00357	1.03824	#VALUE!	#VALUE!	#VALUE!	#VALUE!	0.610268	0.638663	0.688088	0.740585	0.609899	0.622125	0.526745	0.567184	0.890488	0.925204	1.02451	0.975292	0.936266	0.905372	1.15497	0.942828	0.669142	0.663201	0.968286	0.948739	0.669278	0.695382	1.09859	1.06158	0.700703	0.695345	1.05679	1.06296	1.2556	1.29211	0.809867	0.81198	1.06612
ACTA2	0.893569	0.962324	1.13939	1.02065	0.435369	0.100824	#VALUE!	#VALUE!	1.3336	0.575273	0.949331	1.37304	#VALUE!	#VALUE!	#VALUE!	#VALUE!	0.86716	0.926251	0.880128	0.879938	1.02183	1.04995	0.804401	0.792864	1.34189	1.41531	1.36847	1.66313	1.30181	1.20273	1.69718	1.67971	1.12856	1.15305	1.42426	1.39514	0.95785	0.99802	1.38011	1.40081	0.895255	0.874511	2.01981	2.0267	1.69168	1.71178	0.683903	0.676867	1.92742
DNASE1	1.16903	1.01336	0.934299	0.903499	#VALUE!	#VALUE!	#VALUE!	#VALUE!	0.978875	0.865905	1.19479	0.987441	#VALUE!	#VALUE!	#VALUE!	#VALUE!	0.855087	0.873405	0.841912	0.818966	0.885656	0.883665	0.633905	0.71879	1.08261	0.99613	1.21331	1.05686	0.953273	0.858306	1.28544	1.23395	0.977274	0.959657	0.921979	0.894306	0.762723	0.851716	1.10121	1.17091	0.464713	0.532336	1.21848	1.31605	1.48527	1.32502	0.725577	0.772373	1.24383
PRKDC	0.830628	0.873775	1.1735	1.17411	#VALUE!	#VALUE!	#VALUE!	#VALUE!	1.01424	1.01111	1.02631	0.950124	22.5919	#VALUE!	#VALUE!	#VALUE!	0.631738	0.579741	0.585576	0.827233	0.70892	0.76419	0.468181	0.513603	0.855326	0.876087	1.12045	1.08958	1.00861	0.884047	1.20597	1.15266	0.738038	0.728898	0.960241	0.923779	0.839472	0.76186	0.815566	1.19412	0.603589	0.56292	1.26195	1.32121	1.541	1.43194	0.808198	0.82562	1.13437
CXCL3	0.968204	0.917084	1.06837	1.05415	#VALUE!	#VALUE!	#VALUE!	#VALUE!	0.780425	0.972708	1.12264	1.1734	#VALUE!	#VALUE!	#VALUE!	#VALUE!	0.820672	0.717285	0.761175	0.884899	0.767064	0.811924	0.739499	0.542035	0.896792	0.902383	1.09959	1.19623	0.945107	0.821288	0.947444	0.924149	0.775472	0.944118	0.989685	1.0273	0.570281	0.604092	1.10141	1.43858	0.629282	0.711839	1.13423	1.01661	1.60269	1.34072	0.6902	0.56127	1.06408
TGFB1	0.836576	1.23249	0.99144	0.978236	#VALUE!	#VALUE!	#VALUE!	#VALUE!	1.00169	0.957859	1.00301	1.03911	#VALUE!	#VALUE!	#VALUE!	#VALUE!	1.07248	1.07696	0.799456	0.791623	0.909613	0.900271	0.581483	0.650316	0.978814	0.980712	1.04376	1.09801	1.13875	1.15291	1.05751	1.0729	0.828188	1.05794	1.05596	1.08585	0.940055	0.960623	1.41168	1.26452	0.847304	0.923088	1.30432	1.29789	1.3349	1.3845	1.15213	1.18786	1.19479
PTGES3	0.676917	0.379448	3.45968	1.12532	0.376482	0.346159	#VALUE!	#VALUE!	1.16171	0.975977	0.959767	0.918964	0.583139	0.230268	#VALUE!	#VALUE!	0.713694	0.692408	0.753158	1.04743	1.42034	1.38512	0.872147	0.847014	1.09264	1.04647	1.04237	0.943532	1.13026	1.16606	0.971741	0.985305	0.850473	0.850313	0.888991	0.914895	0.780824	0.779706	1.09655	1.10682	1.0721	1.08961	1.03451	1.04287	1.62561	1.57098	1.14525	1.12109	1.2908
PTGS2	0.9344	0.973591	1.0628	1.03428	#VALUE!	#VALUE!	#VALUE!	#VALUE!	0.970992	1.01508	0.977336	1.03811	#VALUE!	#VALUE!	#VALUE!	#VALUE!	0.51825	0.61217	0.736751	0.789677	0.7458	0.706246	0.548963	0.595393	0.884045	0.919037	0.919375	0.936545	0.728651	0.734629	0.896906	0.846612	0.260043	0.544906	0.948783	0.970619	0.93084	0.911845	1.01432	1.02404	0.670326	0.605203	1.04635	0.995566	1.43108	1.43021	1.15472	1.21314	0.971759
HPGDS	3.38877	4.04343	0.405368	0.180035	2312.13	#VALUE!	#VALUE!	#VALUE!	#VALUE!	#VALUE!	#VALUE!	#VALUE!	#VALUE!	#VALUE!	#VALUE!	#VALUE!	0.282244	0.601166	0.855454	2.48416	0.809832	1.02709	4.98029	3.15626	#VALUE!	0.392126	0.333404	#VALUE!	2.57796	1.09115	#VALUE!	#VALUE!	0.345267	0.299405	1.22784	#VALUE!	#VALUE!	0.38147	0.461072	#VALUE!	#VALUE!	0.262234	#VALUE!	#VALUE!	#VALUE!	0.514422	1.36024	0.919841	1.3835
PTGS1	0.93491	1.08198	0.993519	0.995026	#VALUE!	#VALUE!	#VALUE!	#VALUE!	1.02865	0.981722	0.989959	1.00029	#VALUE!	2.28221	#VALUE!	#VALUE!	0.832497	0.688627	0.777927	0.838269	0.75591	0.738054	0.516795	0.611788	1.01798	0.917675	1.19812	1.15067	0.777652	0.768353	1.04125	0.844774	0.747284	0.657576	0.81647	0.864971	0.908952	1.00318	1.39493	1.41618	0.646721	0.611798	1.42212	1.26077	1.5825	1.5326	0.920714	0.804201	1.21045
IL4	1.57451	1.24021	0.781531	0.655258	#VALUE!	#VALUE!	#VALUE!	#VALUE!	1.15368	0.983841	1.03418	0.851908	#VALUE!	#VALUE!	#VALUE!	#VALUE!	0.437326	0.580025	0.217147	0.41955	0.668022	0.225537	0.555882	0.414821	0.422047	0.491268	0.681589	0.337508	0.695638	0.53347	1.31043	0.96043	0.390699	0.332094	0.504764	0.726716	0.454635	0.668614	0.507404	0.395419	0.320657	0.418207	0.947618	0.981422	0.862094	0.649471	0.478918	0.642536	0.717833
CXCL9	1.02121	1.12309	0.984558	0.885577	4.0163	#VALUE!	#DIV/0!	#DIV/0!	#VALUE!	#VALUE!	#VALUE!	#VALUE!	#VALUE!	#VALUE!	#VALUE!	#DIV/0!	0.878673	0.800179	0.850379	0.76287	1.88917	2.19736	1.51098	1.43861	0.708464	0.653488	1.21695	1.26584	0.607511	0.615975	0.964383	0.870696	0.727347	0.705502	0.599197	0.555125	1.42596	1.45547	2.21421	2.74509	0.354174	0.422264	0.715539	0.744384	0.985189	0.809874	0.45633	0.548205	2.20387
CX3CL1	1.13396	1.08669	0.86106	0.942464	#VALUE!	#VALUE!	#VALUE!	#VALUE!	1.04805	0.841508	1.03707	1.09333	#VALUE!	#VALUE!	#VALUE!	#VALUE!	0.592735	0.533231	0.799229	0.920306	0.591396	0.55735	0.770761	0.717215	1.53329	1.81669	0.880932	0.792958	1.02236	0.946934	0.899996	0.697062	0.584098	0.552302	1.01623	0.855201	0.630754	0.641612	0.940969	1.05967	0.257765	0.284644	0.920288	0.87228	2.22094	3.01794	0.997616	0.618693	0.816107
MMP9	4.86341	3.69753	0.3351	0.165949	#VALUE!	#VALUE!	#VALUE!	#VALUE!	0.458466	1.18456	1.40231	1.31308	1686.6	#VALUE!	#VALUE!	#VALUE!	0.256158	0.707902	0.321222	0.479333	0.281334	0.248638	1.48776	1.40929	0.303595	0.272541	0.593551	0.59518	0.634983	0.256482	0.195254	0.348582	0.195028	0.404002	1.21469	0.689619	0.517352	0.352927	0.149863	0.295628	0.471279	0.161599	0.197136	1.03283	0.503186	0.254492	0.327963	0.332842	1.22682
KISS1	4.16012	3.29283	0.0730002	#VALUE!	#VALUE!	#VALUE!	#VALUE!	#VALUE!	#VALUE!	#VALUE!	#VALUE!	#VALUE!	#VALUE!	#VALUE!	#VALUE!	#VALUE!	0.00748404	0.479513	0.304643	0.264086	1.00302	0.488911	1.3711	0.736798	0.827632	0.610291	#VALUE!	#VALUE!	0.910343	0.269691	0.188809	0.0837996	1.58207	1.64366	0.230029	#VALUE!	#VALUE!	0.841343	#VALUE!	0.740689	0.0172198	#VALUE!	0.19544	#VALUE!	0.786339	#VALUE!	#VALUE!	0.0853712	0.733559
PRDX6	0.86842	0.82489	1.19979	1.16351	1.02359	#VALUE!	#VALUE!	#DIV/0!	1.03486	0.977243	1.0063	0.982626	#VALUE!	#VALUE!	#VALUE!	#VALUE!	0.843165	0.861019	1.12222	1.16038	0.87246	0.899344	0.692442	0.716329	1.14583	1.17426	1.2983	1.31266	0.941742	0.877738	1.15581	1.12718	0.798043	0.793106	0.926458	0.90086	0.962246	0.877442	1.39089	1.40104	0.725083	0.754977	1.31434	1.30961	1.60526	1.52803	0.850282	0.91029	1.06944
BOLA-N	0.836072	0.894609	1.19966	1.11446	#VALUE!	#VALUE!	#VALUE!	#VALUE!	0.953657	1.02997	1.02238	0.995798	#VALUE!	#VALUE!	#VALUE!	#VALUE!	1.03704	0.884219	0.915059	0.970346	1.19969	1.2749	0.813482	0.926584	1.32166	1.59233	1.73658	1.76967	1.28237	1.28538	1.38521	1.32946	1.16076	1.13902	1.42245	1.5214	1.06068	1.54655	1.32549	2.05543	0.881494	0.959414	1.55503	1.44492	1.74659	1.62067	1.19641	1.14611	1.81724
PLA2G2A	4.88276	4.7639	0.275903	0.155817	1331.98	380.309	#VALUE!	#VALUE!	#VALUE!	#VALUE!	0.918101	1.08921	#VALUE!	#VALUE!	#VALUE!	#VALUE!	0.182278	0.288698	3.76888	1.50564	0.787984	1.27716	1.15431	1.17733	0.202115	0.748001	0.605747	0.318693	1.24549	1.35197	0.309339	0.423855	1.25862	0.899645	0.215121	0.493266	2.6862	1.4775	0.784228	0.8258	#VALUE!	#VALUE!	0.819915	0.351877	0.88522	0.621743	0.77041	#VALUE!	1.06872
DNMT1	0.879294	0.931009	1.12397	1.08682	#VALUE!	#VALUE!	#VALUE!	#VALUE!	1.01022	0.943302	0.990792	1.05914	#VALUE!	#VALUE!	#VALUE!	#VALUE!	0.745189	0.751776	0.772941	0.76774	0.664171	0.700109	0.566327	0.557061	0.840084	0.853532	0.98274	0.999899	0.803634	0.84597	1.06672	1.04803	0.660516	0.650185	0.93324	0.970947	0.738514	0.729481	1.17432	1.09679	0.619235	0.59056	1.17102	1.25089	1.17084	1.21209	0.891495	0.900261	1.06498
TGFB2	0.837911	0.858675	1.17178	1.18611	#VALUE!	#VALUE!	#VALUE!	#VALUE!	0.966498	0.97869	1.0326	1.02381	#VALUE!	#VALUE!	#VALUE!	#VALUE!	0.709836	0.725204	1.0731	1.01939	0.697799	0.696912	0.599381	0.603442	1.09335	1.0825	1.06562	0.991898	0.885478	0.910093	0.981071	1.01859	0.82984	0.808244	0.951668	0.942793	0.815983	0.824629	1.13858	1.15529	0.653698	0.683272	1.34479	1.25973	1.54105	1.49036	0.85814	0.889674	1.20325
CCL2	1.27218	1.71355	0.621675	0.737887	#VALUE!	#VALUE!	#VALUE!	#VALUE!	2.30009	#VALUE!	0.434765	#VALUE!	#VALUE!	3372.03	#VALUE!	#VALUE!	0.485802	0.318327	0.351662	0.524173	1.90448	2.23919	0.613539	0.714548	0.454282	0.570895	0.387009	0.566793	0.751035	0.697248	0.381433	0.410229	0.655629	0.620897	0.379612	0.290484	1.48939	1.75838	0.480593	0.39498	0.409075	0.281353	0.565656	0.687065	0.439244	0.927044	0.339661	0.545801	2.59685
HPGD	1.97551	2.40252	0.486662	0.432938	#VALUE!	#VALUE!	#VALUE!	#VALUE!	#VALUE!	#VALUE!	1.48207	0.674731	1096.03	#VALUE!	#VALUE!	#VALUE!	1.15751	1.42359	0.442188	0.328337	0.931727	0.858446	2.0291	1.79732	1.13139	1.19729	1.1505	2.07864	2.12202	4.15757	0.962759	1.45302	1.0342	0.511984	1.0407	0.828322	0.813398	0.965037	4.80352	3.17147	1.42863	0.602281	0.369564	13.5063	1.14135	2.30857	1.8281	0.94195	3.73038
DAGLA	1.1949	1.1315	0.921578	0.802568	#VALUE!	#VALUE!	#VALUE!	#VALUE!	0.832438	0.924612	1.30676	0.994243	#VALUE!	#VALUE!	#VALUE!	#VALUE!	0.52078	0.616854	0.723464	0.763257	0.786972	0.692337	0.684532	0.805667	0.8124	0.776185	0.865336	0.803905	0.763092	0.77057	0.912304	0.955937	0.850726	0.748855	0.87469	0.788623	0.664581	0.643065	1.04308	1.13017	0.607078	0.509219	1.26311	1.13119	1.30122	1.3392	0.893832	0.857502	1.05232
IL1B	6.55247	5.50121	0.167717	0.165409	#VALUE!	#VALUE!	#VALUE!	#VALUE!	#VALUE!	#VALUE!	#VALUE!	#VALUE!	#VALUE!	#VALUE!	#VALUE!	#VALUE!	0.712867	1.17984	0.509376	0.624731	0.309417	0.300059	1.82059	0.82174	0.403109	0.622729	0.136556	0.397479	0.873544	0.466462	#VALUE!	#VALUE!	#VALUE!	0.829757	0.13385	#VALUE!	0.467268	#VALUE!	#VALUE!	#VALUE!	0.271783	0.662743	0.475081	1.11955	0.685299	2.07758	0.389491	#VALUE!	0.769666
IL6	2.02341	1.86722	0.408729	0.647568	#VALUE!	#VALUE!	#VALUE!	#VALUE!	1.13606	1.04351	0.908064	0.928943	#VALUE!	#VALUE!	#VALUE!	#VALUE!	0.341539	0.445399	0.447692	0.362106	0.492922	0.088557	0.531506	0.629638	0.474866	0.278429	0.347668	0.145274	0.291485	0.218699	0.475433	0.466742	0.338685	0.351345	0.570906	0.693951	0.585884	0.334895	0.4574	0.401325	0.469541	0.24557	0.436357	0.876977	1.01795	0.629078	0.23191	0.591405	0.432738
CXCL10	0.982839	1.08589	0.983017	0.953167	#VALUE!	#VALUE!	#VALUE!	#VALUE!	#VALUE!	#VALUE!	#VALUE!	#VALUE!	#VALUE!	#VALUE!	#VALUE!	#VALUE!	0.583866	0.594313	1.16406	0.90423	0.638451	0.583604	0.824431	0.836806	1.04153	1.14019	1.71677	1.87571	0.645047	0.714636	0.873033	0.686251	0.696394	0.794798	0.790894	0.701764	0.773289	0.751535	0.840602	0.995471	0.800256	0.832713	0.982526	0.888476	2.14054	1.54236	0.615375	0.578932	0.993173
CXCR3	2.4116	2.24051	0.35992	0.514211	#VALUE!	#VALUE!	#VALUE!	#VALUE!	2.52302	0.645944	0.920752	0.666411	#VALUE!	#VALUE!	#VALUE!	#VALUE!	0.170822	0.174137	0.949245	0.191717	0.260071	0.285617	0.686327	0.562731	0.972279	0.934416	1.30152	1.11257	0.297241	0.0851015	0.54331	0.290269	1.04996	0.756364	0.188962	0.421825	0.638214	1.30809	0.325646	0.418014	1.69407	0.35245	0.802574	0.811735	1.24653	0.969053	0.100835	0.199104	0.297023
MMP12	2.18163	1.97886	0.62354	0.371482	26.6915	19.5853	#VALUE!	#VALUE!	0.987655	0.995986	1.11252	0.913767	150.579	120.338	#VALUE!	#VALUE!	0.61887	0.655735	0.385586	0.545465	0.964686	1.00605	1.96269	2.09467	0.901792	0.740266	1.23862	1.06981	1.18678	1.073	1.06417	1.05377	1.18082	1.09133	0.967289	0.909004	0.718337	0.584568	0.662662	0.560156	0.394442	0.449106	0.886765	0.907641	0.828915	1.27343	0.43207	0.469269	1.04979
GNRHR	5.28319	6.04825	0.0312949	#VALUE!	1842.2	#VALUE!	#VALUE!	#VALUE!	#VALUE!	#VALUE!	#VALUE!	#VALUE!	#VALUE!	#VALUE!	#VALUE!	#VALUE!	0.932758	0.471851	1.09001	0.553499	0.328651	#VALUE!	3.98823	3.4692	0.288905	0.791843	#VALUE!	0.149457	0.657954	0.441187	#VALUE!	0.165172	0.333364	1.10252	0.152926	0.179359	0.47183	0.715552	0.258489	#VALUE!	0.143189	0.256423	0.345887	0.299427	0.468312	0.422218	0.181091	0.137995	0.256156
IL17A	3.96882	2.63078	0.21684	0.441686	#VALUE!	2240.06	#VALUE!	#VALUE!	#VALUE!	1.10203	0.907414	#VALUE!	#VALUE!	7313.18	#VALUE!	#VALUE!	0.237582	0.156898	2.07856	1.10655	1.98399	0.294013	1.42971	1.9493	0.381509	0.695862	0.321882	0.671908	0.795702	1.11864	0.260552	#VALUE!	#VALUE!	0.805635	#VALUE!	0.286809	0.40192	0.794766	#VALUE!	0.908086	#VALUE!	#VALUE!	0.338001	#VALUE!	0.349787	#VALUE!	0.630128	#VALUE!	0.982994
KCTD11	0.923933	0.89143	1.16435	1.04277	#VALUE!	#VALUE!	#VALUE!	#VALUE!	0.95502	0.872983	1.17335	1.02224	#VALUE!	#VALUE!	#VALUE!	#VALUE!	0.817588	0.820959	1.02322	1.08089	0.709435	0.658024	0.57776	0.599129	1.02146	0.997611	0.962668	0.989633	1.04484	0.87732	0.94802	0.942121	0.66481	0.643286	0.75674	0.690991	0.69271	0.70218	1.33743	1.25717	0.442326	0.441175	1.3096	1.30025	1.17095	1.08896	0.755971	0.744482	0.90605
OSTF1	0.825091	0.833109	1.19683	1.21552	#VALUE!	#VALUE!	#DIV/0!	#VALUE!	0.932536	0.921609	1.11487	1.04367	#VALUE!	0.969965	#VALUE!	#VALUE!	0.744944	0.751361	1.06729	1.07761	0.787976	0.78918	0.794384	0.796048	0.96043	1.02151	1.09978	1.03155	0.882824	0.861539	0.988675	1.00843	0.946103	0.946304	0.942083	0.999502	0.802172	0.857997	1.35883	1.29761	0.956904	1.00093	1.35398	1.33537	1.31938	1.40182	0.895464	0.888193	1.18084
DNMT3A	1.5192	2.08429	0.600787	0.525661	23.2007	#VALUE!	#VALUE!	#DIV/0!	1.9371	1.50967	0.708732	0.482485	40.8557	#VALUE!	#VALUE!	#VALUE!	0.399334	0.738571	0.807663	0.466921	0.769117	0.525347	0.761498	0.893843	0.901731	0.755616	0.743649	1.1581	0.771168	0.706512	0.950257	0.610914	0.828858	0.600816	0.388892	0.371778	2.30551	1.1663	0.60766	0.449464	0.43802	0.253043	0.717757	0.904328	1.13918	1.1163	0.609862	0.25325	0.491261
RAB27A	0.987903	1.00398	1.06762	0.944378	#VALUE!	#VALUE!	#VALUE!	#VALUE!	0.919713	0.828753	1.22399	1.07187	#VALUE!	#VALUE!	#VALUE!	#VALUE!	0.830609	0.859694	0.813162	0.747563	0.702009	0.776839	0.624466	0.694216	1.25126	1.3354	1.29015	1.14271	0.968493	0.99645	1.1526	1.29212	0.756252	0.794999	1.12826	1.21131	0.809803	0.932127	1.65547	1.27094	0.731195	0.780892	1.29035	1.29945	1.63459	1.70134	0.903849	0.853424	1.50341
CCL3	4.42427	3.14493	0.07187	#VALUE!	#VALUE!	#VALUE!	#VALUE!	#DIV/0!	4.21933	#VALUE!	0.237004	#VALUE!	#VALUE!	#VALUE!	#VALUE!	#VALUE!	0.532424	0.119	0.743325	0.765338	0.101198	0.130817	1.24579	1.53418	0.15537	0.373002	0.247411	0.0174237	0.39626	0.345951	#VALUE!	0.0890863	0.00632585	0.0849761	#VALUE!	0.0920057	0.396116	0.118222	0.0606264	#VALUE!	0.0651196	0.108213	#VALUE!	0.107397	#VALUE!	#VALUE!	0.131888	0.220555	0.394405
GAPDH	0.781648	0.769512	1.28241	1.29643	0.699783	0.419351	#VALUE!	#VALUE!	1.11219	0.688134	1.09809	1.18989	0.281634	0.11317	#VALUE!	#VALUE!	0.741297	0.779004	1.2021	1.1359	1.65587	1.6473	0.759719	0.747265	1.12169	1.10807	1.25651	1.2498	1.01624	1.02157	1.13576	1.1284	1.03071	1.03509	1.21312	1.16727	0.967159	0.993074	1.51836	1.49405	1.14149	1.14414	1.47223	1.51017	1.50516	1.53331	1.09901	1.08542	1.4175
ACTB	0.896198	0.905108	1.09198	1.12896	0.0459783	0.043646	#VALUE!	#VALUE!	1.00852	1.00035	0.987248	1.00401	0.134803	0.175032	#VALUE!	#VALUE!	0.782331	0.793667	0.893643	0.951332	0.849441	0.847906	0.705525	0.703571	1.14409	1.15775	1.23051	1.22758	0.983835	0.981058	1.18891	1.18009	0.707352	0.718088	0.956904	0.958198	0.74354	0.598235	1.16569	1.24768	1.26865	1.26522	1.28871	1.29427	1.61044	1.54555	0.844907	0.875236	1.05862
TBP	0.939908	0.968544	1.15505	0.951027	#VALUE!	#VALUE!	#VALUE!	#VALUE!	1.08508	0.983202	1.03748	0.903471	#VALUE!	#VALUE!	#VALUE!	#VALUE!	0.79014	0.932553	0.985891	1.02935	0.758752	0.771491	0.76395	0.830521	1.02326	1.07225	1.59524	1.37845	0.955322	0.894636	1.51516	1.38471	0.939806	0.826575	1.01965	0.920987	1.04301	1.23056	1.41791	1.40945	0.682453	0.828111	1.30978	1.33687	1.3612	1.4723	0.981225	1.00138	1.2523
GDC	4.82138	4.56503	0.0454345	#VALUE!	#VALUE!	#VALUE!	#VALUE!	#VALUE!	#VALUE!	#VALUE!	1.03079	0.970132	#VALUE!	#VALUE!	#VALUE!	#VALUE!	#VALUE!	1.08345	0.480864	1.55654	1.32822	#VALUE!	10.5147	7.79898	1.17825	0.458921	1.05686	1.14268	4.57982	1.12925	#VALUE!	#VALUE!	0.744805	0.339072	0.469315	1.06088	0.401434	#VALUE!	#VALUE!	#VALUE!	#VALUE!	1.40895	2.09388	1.4636	2.59488	1.30207	#VALUE!	0.514927	#VALUE!
RTC	1.00402	0.950704	1.07219	0.977103	#VALUE!	#VALUE!	#VALUE!	#VALUE!	0.93996	0.859863	1.09585	1.12904	#VALUE!	#VALUE!	#VALUE!	#VALUE!	1.14084	1.15436	1.45104	1.42922	1.00156	1.02105	1.31931	1.3011	1.35287	1.37849	1.3726	1.32386	1.1143	1.09221	1.1686	1.22031	1.36503	1.26581	1.29032	1.29793	1.28784	1.30779	1.52473	1.60706	1.15764	1.13023	1.47114	1.49963	1.78653	1.73296	1.7107	1.79281	1.29986
HPRT1	0.799282	0.800602	1.2797	1.22117	0.50513	#VALUE!	#VALUE!	#VALUE!	1.06249	1.06501	0.969639	0.911405	#VALUE!	0.916495	#VALUE!	#VALUE!	0.712579	0.720351	1.13733	1.17937	0.754492	0.764054	0.655631	0.661286	1.00086	1.04002	1.08199	1.03692	0.93607	0.87884	1.14016	1.16993	0.824123	0.788618	1.01264	1.01893	0.997077	0.894351	1.21783	1.23469	0.829565	0.830349	1.1373	1.12137	1.30522	1.28795	1.10126	1.09495	1.13093
PPC	1.20417	1.09334	1.13109	0.671521	12397.9	13601.4	#DIV/0!	#DIV/0!	1.08571	0.790903	1.1335	1.0274	4900.28	5925.94	#DIV/0!	#DIV/0!	3.37157	3.00199	1.0708	1.22928	2.94978	2.74444	2.88519	2.4734	2.57026	2.20476	3.54402	2.68405	3.81113	3.29456	2.8122	2.61889	2.638	2.73698	3.26638	3.18725	2.82643	2.94134	3.37009	3.29675	3.68779	3.92158	2.97855	3.01951	4.59416	3.10475	2.2861	2.19172	3.95836
[truncated: 56 more columns]
