# Supplementary material for: Prostaglandin synthases and pro-inflammatory cytokine gene expression dynamics in bovine endometrial cells exposed to cow blood plasma small extracellular vesicles (sEV) reflect the fertility breeding value
Source: Research Square preprint supplement (doi:10.21203/rs.3.rs-2342758/v1), 2022-12-13
Supplement: Supplementary file 2 [file a3e84880bf2c6505af4c0084.docx]

Western Blot results

- BSA

Low Fertile sEV

High Fertile sEV

**R1 R2 R3 R1 R2 R3 R1 R2 R3 R1 R2 R3**

**R1 R2 R3 R1 R2 R3 R1 R2 R3 R1 R2 R3**


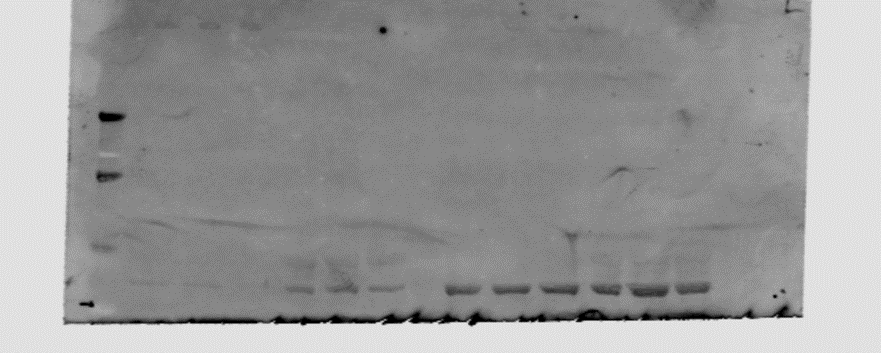


69 kDa

Pooled sEV fractions 7-10

Pooled sEV fractions 11-16

Low Fertile sEV

High Fertile sEV

- CD81


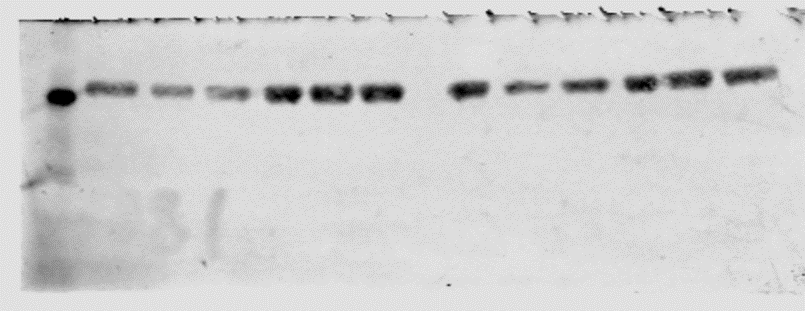


**R1 R2 R3 R1 R2 R3 R1 R2 R3 R1 R2 R3**

High Fertile sEV

Low Fertile sEV

Pooled sEV fractions 7-10

Pooled sEV fractions 11-16

Low Fertile sEV

High Fertile sEV

25 kDa

- Flotillin -1
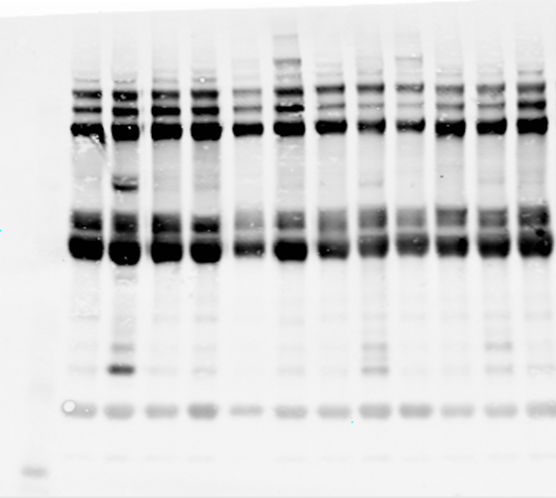


**R1 R2 R3 R1 R2 R3 R1 R2 R3 R1 R2 R3**

High Fertile sEV

Low Fertile sEV

Pooled sEV fractions 7-10

Pooled sEV fractions 11-16

49 kDa

Low Fertile sEV

High Fertile sEV
